# Supplementary material
Source: publisher site journal article supplement (https://www.spandidos-publications.com/1939/downloadSupplementary)
Supplement: Supplementary file 2 [file downloadSupplementary]

## Sheet: Differential_analysis_results
Table SI. Differential analysis results.
gene_id	gene_name	gene_chr	gene_start	gene_end	gene_strand	gene_length	gene_biotype	gene_description	tf_family	Test	Control	log2FoldChange	pvalue	padj
ENSG00000129824	RPS4Y1	Y	2841486	2932000	+	2275	protein_coding	ribosomal protein S4 Y-linked 1 [Source:HGNC Symbol;Acc:HGNC:10425]	-	80.03	0	9.20413	1.77336e-266	2.63219e-262
ENSG00000229807	XIST	X	73820651	73852723	-	25264	lincRNA	X inactive specific transcript [Source:HGNC Symbol;Acc:HGNC:12810]	-	0	5.96	-8.91984	7.28832e-239	5.40903e-235
ENSG00000012817	KDM5D	Y	19703865	19744939	-	9463	protein_coding	lysine demethylase 5D [Source:HGNC Symbol;Acc:HGNC:11115]	ARID	12.02	0	8.69283	1.3111e-232	6.4869e-229
ENSG00000067048	DDX3Y	Y	12904108	12920478	+	5738	protein_coding	DEAD-box helicase 3 Y-linked [Source:HGNC Symbol;Acc:HGNC:2699]	-	20.29	0	8.70279	2.97591e-232	1.10429e-228
ENSG00000131002	TXLNGY	Y	19567313	19606274	+	11377	transcribed_unprocessed_pseudogene	taxilin gamma pseudogene, Y-linked [Source:HGNC Symbol;Acc:HGNC:18473]	-	7.37	0	8.3161	8.53418e-207	2.53346e-203
ENSG00000099725	PRKY	Y	7273972	7381548	+	7674	transcribed_unprocessed_pseudogene	protein kinase Y-linked (pseudogene) [Source:HGNC Symbol;Acc:HGNC:9444]	-	9.31	0.02	7.25178	2.09215e-190	5.17563e-187
ENSG00000114374	USP9Y	Y	12701231	12860839	+	11237	protein_coding	ubiquitin specific peptidase 9 Y-linked [Source:HGNC Symbol;Acc:HGNC:12633]	-	4.77	0	7.60254	8.13124e-163	1.72417e-159
ENSG00000183878	UTY	Y	13248379	13480673	-	9191	protein_coding	ubiquitously transcribed tetratricopeptide repeat containing, Y-linked [Source:HGNC Symbol;Acc:HGNC:12638]	-	5.36	0	7.61367	7.70997e-162	1.43049e-158
ENSG00000198692	EIF1AY	Y	20575725	20593154	+	4074	protein_coding	eukaryotic translation initiation factor 1A Y-linked [Source:HGNC Symbol;Acc:HGNC:3252]	-	8.69	0	7.09454	2.17888e-131	3.59345e-128
ENSG00000185736	ADARB2	10	1177318	1737476	-	10513	protein_coding	adenosine deaminase, RNA specific B2 (inactive) [Source:HGNC Symbol;Acc:HGNC:227]	-	0.02	4.53	-6.36977	2.67562e-131	3.97143e-128
ENSG00000233864	TTTY15	Y	12662334	12692233	+	5284	lincRNA	testis-specific transcript, Y-linked 15 [Source:HGNC Symbol;Acc:HGNC:18567]	-	1.29	0	5.02375	3.73896e-54	5.04522e-51
ENSG00000241859	ANOS2P	Y	13751656	13915824	+	2369	transcribed_unprocessed_pseudogene	anosmin 2, pseudogene [Source:HGNC Symbol;Acc:HGNC:6214]	-	2.83	0.01	4.89676	2.26452e-53	2.80102e-50
ENSG00000231535	LINC00278	Y	3002912	3102272	+	775	lincRNA	long intergenic non-protein coding RNA 278 [Source:HGNC Symbol;Acc:HGNC:38712]	-	7.4	0	4.565	8.0318e-42	9.17046e-39
ENSG00000215580	BCORP1	Y	19455431	19503153	-	7069	transcribed_unprocessed_pseudogene	BCL6 corepressor pseudogene 1 [Source:HGNC Symbol;Acc:HGNC:23953]	-	1.32	0	4.60094	7.07623e-41	7.50232e-38
ENSG00000067646	ZFY	Y	2935281	2982506	+	5527	protein_coding	zinc finger protein Y-linked [Source:HGNC Symbol;Acc:HGNC:12870]	zf-C2H2	0.54	0	3.88909	3.20273e-29	3.16921e-26
ENSG00000154620	TMSB4Y	Y	13703567	13706024	+	1669	protein_coding	thymosin beta 4 Y-linked [Source:HGNC Symbol;Acc:HGNC:11882]	-	1.51	0	3.64991	2.53723e-25	2.35375e-22
ENSG00000260197	AC010889.1	Y	19691941	19694606	-	2666	lincRNA	novel transcript	-	0.99	0	3.44615	4.32952e-22	3.78018e-19
ENSG00000229236	TTTY10	Y	20465668	20519228	-	1726	lincRNA	testis-specific transcript, Y-linked 10 [Source:HGNC Symbol;Acc:HGNC:18491]	-	1.33	0	3.38774	2.12437e-21	1.75178e-18
ENSG00000226918	AC010086.1	Y	21311268	21318895	+	1052	unprocessed_pseudogene	RNA binding motif protein, Y-linked, family 1, member A1 (RBMY1A1) pseudogene	-	1.36	0	2.82835	6.89927e-15	5.38978e-12
ENSG00000002933	TMEM176A	7	150800403	150805120	+	3479	protein_coding	transmembrane protein 176A [Source:HGNC Symbol;Acc:HGNC:24930]	-	1.67	6.92	-1.773	1.09191e-13	8.10359e-11
ENSG00000145730	PAM	5	102753981	103031105	+	8846	protein_coding	peptidylglycine alpha-amidating monooxygenase [Source:HGNC Symbol;Acc:HGNC:8596]	-	5.59	11.61	-0.971268	7.59514e-12	5.36831e-09
ENSG00000150687	PRSS23	11	86791059	86952910	+	11725	protein_coding	serine protease 23 [Source:HGNC Symbol;Acc:HGNC:14370]	-	1.26	2.63	-0.979497	1.98084e-11	1.33644e-08
ENSG00000106565	TMEM176B	7	150791285	150801360	-	1979	protein_coding	transmembrane protein 176B [Source:HGNC Symbol;Acc:HGNC:29596]	-	8.97	26.83	-1.40501	3.39815e-11	2.19299e-08
ENSG00000146070	PLA2G7	6	46704201	46735693	-	2026	protein_coding	phospholipase A2 group VII [Source:HGNC Symbol;Acc:HGNC:9040]	-	3.13	0.79	1.6921	2.98162e-10	1.84401e-07
ENSG00000133055	MYBPH	1	203167811	203175813	-	1805	protein_coding	myosin binding protein H [Source:HGNC Symbol;Acc:HGNC:7552]	-	1.59	0.3	1.89242	4.74221e-10	2.81554e-07
ENSG00000176728	TTTY14	Y	18872501	19077416	-	3239	lincRNA	testis-specific transcript, Y-linked 14 [Source:HGNC Symbol;Acc:HGNC:18495]	-	1.13	0.04	2.23967	8.35761e-10	4.77123e-07
ENSG00000101220	C20orf27	20	3753508	3768387	-	2415	protein_coding	chromosome 20 open reading frame 27 [Source:HGNC Symbol;Acc:HGNC:15873]	-	21.33	10.95	0.954369	1.55449e-09	8.54565e-07
ENSG00000170298	LGALS9B	17	20449395	20467539	-	2670	protein_coding	galectin 9B [Source:HGNC Symbol;Acc:HGNC:24842]	-	1.13	2.91	-1.20601	2.33878e-09	1.23981e-06
ENSG00000137474	MYO7A	11	77128264	77215241	+	10147	protein_coding	myosin VIIA [Source:HGNC Symbol;Acc:HGNC:7606]	-	0.64	0.26	1.21556	1.29231e-08	6.61441e-06
ENSG00000165246	NLGN4Y	Y	14522573	14845650	+	8589	protein_coding	neuroligin 4 Y-linked [Source:HGNC Symbol;Acc:HGNC:15529]	-	0.09	0	1.96928	6.22165e-08	NA
ENSG00000180113	TDRD6	6	46687875	46704319	+	9041	protein_coding	tudor domain containing 6 [Source:HGNC Symbol;Acc:HGNC:21339]	-	0.25	0.06	1.61393	2.11155e-07	0.000104473
ENSG00000149534	MS4A2	11	60088261	60098466	+	4453	protein_coding	membrane spanning 4-domains A2 [Source:HGNC Symbol;Acc:HGNC:7316]	-	1.07	2.58	-1.10287	1.16158e-06	0.000556171
ENSG00000214548	MEG3	14	100779410	100861031	+	23224	lincRNA	maternally expressed 3 [Source:HGNC Symbol;Acc:HGNC:14575]	-	0.1	0.02	1.59058	1.50677e-06	0.000698908
ENSG00000120370	GORAB	1	170532129	170553446	+	3773	protein_coding	golgin, RAB6 interacting [Source:HGNC Symbol;Acc:HGNC:25676]	-	2.99	1.64	0.844055	1.81481e-06	0.000816278
ENSG00000137441	FGFBP2	4	15960243	15969309	-	1250	protein_coding	fibroblast growth factor binding protein 2 [Source:HGNC Symbol;Acc:HGNC:29451]	-	30.46	57.02	-0.810593	2.50311e-06	0.00109276
ENSG00000106066	CPVL	7	28995231	29195451	-	3340	protein_coding	carboxypeptidase, vitellogenic like [Source:HGNC Symbol;Acc:HGNC:14399]	-	30.54	20.37	0.605846	2.88698e-06	0.00122433
ENSG00000121807	CCR2	3	46353734	46360928	+	3733	protein_coding	C-C motif chemokine receptor 2 [Source:HGNC Symbol;Acc:HGNC:1603]	-	33.89	20.8	0.711128	3.59717e-06	0.00148313
ENSG00000184368	MAP7D2	X	20006713	20116917	-	4376	protein_coding	MAP7 domain containing 2 [Source:HGNC Symbol;Acc:HGNC:25899]	-	0.03	0.27	-1.67635	3.8173e-06	0.00149328
ENSG00000183943	PRKX	X	3604370	3713608	-	6452	protein_coding	protein kinase X-linked [Source:HGNC Symbol;Acc:HGNC:9441]	-	8.47	13.51	-0.608552	3.91213e-06	0.00149328
ENSG00000107731	UNC5B	10	71212570	71302864	+	6841	protein_coding	unc-5 netrin receptor B [Source:HGNC Symbol;Acc:HGNC:12568]	-	0.39	0.13	1.29619	3.92359e-06	0.00149328
ENSG00000189306	RRP7A	22	42509968	42519802	-	4082	protein_coding	ribosomal RNA processing 7 homolog A [Source:HGNC Symbol;Acc:HGNC:24286]	-	6.96	4.47	0.652055	5.10636e-06	0.00189484
ENSG00000242550	SERPINB10	18	63897174	63936111	+	2700	protein_coding	serpin family B member 10 [Source:HGNC Symbol;Acc:HGNC:8942]	-	0.61	0.13	1.5305	6.80527e-06	0.00246368
ENSG00000205336	ADGRG1	16	57610652	57665580	+	8659	protein_coding	adhesion G protein-coupled receptor G1 [Source:HGNC Symbol;Acc:HGNC:4512]	-	15.03	27.3	-0.773812	8.32335e-06	0.00288168
ENSG00000116133	DHCR24	1	54849627	54887271	-	6290	protein_coding	24-dehydrocholesterol reductase [Source:HGNC Symbol;Acc:HGNC:2859]	-	1.05	2.15	-0.90626	8.34821e-06	0.00288168
ENSG00000071246	VASH1	14	76762189	76783015	+	6502	protein_coding	vasohibin 1 [Source:HGNC Symbol;Acc:HGNC:19964]	-	3.53	1.76	0.951564	1.05897e-05	0.00357235
ENSG00000179348	GATA2	3	128479427	128493185	-	4459	protein_coding	GATA binding protein 2 [Source:HGNC Symbol;Acc:HGNC:4171]	zf-GATA	6.17	10.78	-0.719341	1.28346e-05	0.00423342
ENSG00000196352	CD55	1	207321376	207386804	+	5908	protein_coding	CD55 molecule (Cromer blood group) [Source:HGNC Symbol;Acc:HGNC:2665]	-	20.88	36.39	-0.714235	1.79808e-05	0.00580192
ENSG00000233070	ZFY-AS1	Y	2966844	3002626	-	796	antisense	ZFY antisense RNA 1 [Source:HGNC Symbol;Acc:HGNC:38798]	-	0.67	0	1.51135	1.93863e-05	NA
ENSG00000165061	ZMAT4	8	40530590	40897833	-	3691	protein_coding	zinc finger matrin-type 4 [Source:HGNC Symbol;Acc:HGNC:25844]	-	0.11	0.49	-1.42325	2.02238e-05	0.00638684
ENSG00000104918	RETN	19	7669044	7670454	+	520	protein_coding	resistin [Source:HGNC Symbol;Acc:HGNC:20389]	-	7.52	3.43	1.02426	2.27587e-05	0.00703765
ENSG00000173674	EIF1AX	X	20124518	20141844	-	4427	protein_coding	eukaryotic translation initiation factor 1A X-linked [Source:HGNC Symbol;Acc:HGNC:3250]	-	7.86	13.3	-0.682257	2.47684e-05	0.00750281
ENSG00000134545	KLRC1	12	10442264	10454685	-	2698	protein_coding	killer cell lectin like receptor C1 [Source:HGNC Symbol;Acc:HGNC:6374]	-	2.1	4.02	-0.82757	2.72622e-05	0.00809305
ENSG00000135218	CD36	7	80369575	80679277	+	10880	protein_coding	CD36 molecule [Source:HGNC Symbol;Acc:HGNC:1663]	-	16.77	11.13	0.608093	2.88249e-05	0.00838918
ENSG00000109956	B3GAT1	11	134378504	134411918	-	11425	protein_coding	beta-1,3-glucuronyltransferase 1 [Source:HGNC Symbol;Acc:HGNC:921]	-	1.72	3.04	-0.729914	3.19187e-05	0.00911095
ENSG00000188372	ZP3	7	76397518	76442071	+	2716	protein_coding	zona pellucida glycoprotein 3 [Source:HGNC Symbol;Acc:HGNC:13189]	-	1.15	0.45	1.15249	4.0536e-05	0.0113524
ENSG00000255398	HCAR3	12	122714756	122716892	-	2137	protein_coding	hydroxycarboxylic acid receptor 3 [Source:HGNC Symbol;Acc:HGNC:16824]	-	15.78	28.08	-0.736178	4.19146e-05	0.0115211
ENSG00000177606	JUN	1	58780788	58784327	-	3540	protein_coding	Jun proto-oncogene, AP-1 transcription factor subunit [Source:HGNC Symbol;Acc:HGNC:6204]	TF_bZIP	5.89	9.73	-0.646343	4.36023e-05	0.0116855
ENSG00000272602	ZNF595	4	53285	88211	+	3933	protein_coding	zinc finger protein 595 [Source:HGNC Symbol;Acc:HGNC:27196]	zf-C2H2	0.94	1.93	-0.900528	4.40872e-05	0.0116855
ENSG00000180712	LINC02363	4	184340756	184353977	-	2353	lincRNA	long intergenic non-protein coding RNA 2363 [Source:HGNC Symbol;Acc:HGNC:53286]	-	2.06	0.98	0.975104	4.49956e-05	0.011717
ENSG00000184557	SOCS3	17	78356778	78360077	-	2734	protein_coding	suppressor of cytokine signaling 3 [Source:HGNC Symbol;Acc:HGNC:19391]	-	17.41	29.37	-0.677771	5.22037e-05	0.0132064
ENSG00000160179	ABCG1	21	42199689	42297244	+	6121	protein_coding	ATP binding cassette subfamily G member 1 [Source:HGNC Symbol;Acc:HGNC:73]	-	7.09	11.74	-0.647156	5.24946e-05	0.0132064
ENSG00000147050	KDM6A	X	44873177	45112602	+	7139	protein_coding	lysine demethylase 6A [Source:HGNC Symbol;Acc:HGNC:12637]	-	8.29	12.45	-0.526025	5.91479e-05	0.0146322
ENSG00000072952	MRVI1	11	10573091	10693988	-	7700	protein_coding	murine retrovirus integration site 1 homolog [Source:HGNC Symbol;Acc:HGNC:7237]	-	0.38	0.9	-1.02215	6.17429e-05	0.0149283
ENSG00000103811	CTSH	15	78921058	78949574	-	5892	protein_coding	cathepsin H [Source:HGNC Symbol;Acc:HGNC:2535]	-	20.39	13.54	0.602862	6.23564e-05	0.0149283
ENSG00000005889	ZFX	X	24149173	24216255	+	9037	protein_coding	zinc finger protein X-linked [Source:HGNC Symbol;Acc:HGNC:12869]	zf-C2H2	5	7.89	-0.585924	6.45425e-05	0.0151008
ENSG00000267453	LINC01835	19	15851993	15864904	-	774	transcribed_unprocessed_pseudogene	long intergenic non-protein coding RNA 1835 [Source:HGNC Symbol;Acc:HGNC:52651]	-	1.84	5.96	-1.2514	6.5693e-05	0.0151008
ENSG00000211716	TRBV9	7	142391891	142392412	+	390	TR_V_gene	T cell receptor beta variable 9 [Source:HGNC Symbol;Acc:HGNC:12246]	-	8.5	34.57	-1.36132	6.67351e-05	0.0151008
ENSG00000158473	CD1D	1	158179947	158184896	+	2253	protein_coding	CD1d molecule [Source:HGNC Symbol;Acc:HGNC:1637]	-	25.15	15.96	0.65866	6.71462e-05	0.0151008
ENSG00000171596	NMUR1	2	231523160	231530495	-	3298	protein_coding	neuromedin U receptor 1 [Source:HGNC Symbol;Acc:HGNC:4518]	-	5.75	12.12	-0.915438	6.92839e-05	0.015349
ENSG00000179639	FCER1A	1	159289714	159308224	+	1165	protein_coding	Fc fragment of IgE receptor Ia [Source:HGNC Symbol;Acc:HGNC:3609]	-	19.25	30.37	-0.593373	7.47427e-05	0.0163148
ENSG00000250510	GPR162	12	6821545	6829972	+	3295	protein_coding	G protein-coupled receptor 162 [Source:HGNC Symbol;Acc:HGNC:16693]	-	14.56	5.43	1.16038	8.27589e-05	0.0178028
ENSG00000278196	IGLV2-8	22	22822658	22823289	+	517	IG_V_gene	immunoglobulin lambda variable 2-8 [Source:HGNC Symbol;Acc:HGNC:5895]	-	5.92	24.71	-1.35507	8.64237e-05	0.0183255
ENSG00000105251	SHD	19	4278601	4290724	+	2811	protein_coding	Src homology 2 domain containing transforming protein D [Source:HGNC Symbol;Acc:HGNC:30633]	-	0.11	0.55	-1.38865	8.79644e-05	0.0183895
ENSG00000205221	VIT	2	36696690	36814792	+	3710	protein_coding	vitrin [Source:HGNC Symbol;Acc:HGNC:12697]	-	0.18	0.65	-1.28432	9.02346e-05	0.0186021
ENSG00000169994	MYO7B	2	127535802	127637729	+	8800	protein_coding	myosin VIIB [Source:HGNC Symbol;Acc:HGNC:7607]	-	1.73	0.95	0.81526	9.44461e-05	0.0190429
ENSG00000279058	AGAP14P	10	46337224	46358714	+	2060	unprocessed_pseudogene	ArfGAP with GTPase domain, ankyrin repeat and PH domain 14, pseudogene [Source:HGNC Symbol;Acc:HGNC:23660]	-	3.74	2.17	0.767081	9.49386e-05	0.0190429
ENSG00000051128	HOMER3	19	18929201	18941261	-	3422	protein_coding	homer scaffold protein 3 [Source:HGNC Symbol;Acc:HGNC:17514]	-	1.8	0.9	0.909948	0.000101181	0.0200244
ENSG00000239961	LILRA4	19	54333185	54339150	-	2171	protein_coding	leukocyte immunoglobulin like receptor A4 [Source:HGNC Symbol;Acc:HGNC:15503]	-	0.75	2.25	-1.19154	0.000103488	0.0202115
ENSG00000149516	MS4A3	11	60056587	60071128	+	2095	protein_coding	membrane spanning 4-domains A3 [Source:HGNC Symbol;Acc:HGNC:7317]	-	2.66	4.79	-0.74771	0.000112516	0.0216893
ENSG00000113721	PDGFRB	5	150113837	150155872	-	7137	protein_coding	platelet derived growth factor receptor beta [Source:HGNC Symbol;Acc:HGNC:8804]	-	0.75	1.31	-0.699676	0.000114546	0.0217976
ENSG00000038427	VCAN	5	83471465	83582303	+	14831	protein_coding	versican [Source:HGNC Symbol;Acc:HGNC:2464]	-	9.46	5.47	0.761101	0.000117031	0.0219884
ENSG00000198848	CES1	16	55802851	55833337	-	2937	protein_coding	carboxylesterase 1 [Source:HGNC Symbol;Acc:HGNC:1863]	-	3.91	1	1.329	0.000122309	0.0226929
ENSG00000224635	AL391095.1	20	38406011	38416797	-	2004	lincRNA	novel transcript	-	0.45	1.17	-1.09079	0.000144266	0.0264364
ENSG00000080573	COL5A3	19	9959561	10010471	-	6750	protein_coding	collagen type V alpha 3 chain [Source:HGNC Symbol;Acc:HGNC:14864]	-	2.2	1.13	0.886103	0.000149164	0.0270004
ENSG00000132740	IGHMBP2	11	68903842	68940602	+	6465	protein_coding	immunoglobulin mu DNA binding protein 2 [Source:HGNC Symbol;Acc:HGNC:5542]	-	5.46	3.32	0.701762	0.000160621	0.0287241
ENSG00000102837	OLFM4	13	53028759	53052057	+	2897	protein_coding	olfactomedin 4 [Source:HGNC Symbol;Acc:HGNC:17190]	-	0.7	0.14	1.34756	0.00017165	0.030331
ENSG00000138646	HERC5	4	88457117	88506163	+	4766	protein_coding	HECT and RLD domain containing E3 ubiquitin protein ligase 5 [Source:HGNC Symbol;Acc:HGNC:24368]	-	4.81	7.26	-0.52872	0.000180071	0.031187
ENSG00000276345	AC004556.1	KI270721.1	2585	11802	+	740	protein_coding	39S ribosomal protein L23, mitochondrial-like [Source:NCBI gene;Acc:107987373]	-	7.63	2.24	1.26015	0.000181231	0.031187
ENSG00000166436	TRIM66	11	8612037	8682694	-	11752	protein_coding	tripartite motif containing 66 [Source:HGNC Symbol;Acc:HGNC:29005]	-	3	2.12	0.521985	0.000182798	0.031187
ENSG00000162692	VCAM1	1	100719742	100739045	+	6049	protein_coding	vascular cell adhesion molecule 1 [Source:HGNC Symbol;Acc:HGNC:12663]	-	0	0.08	-1.27411	0.000193393	NA
ENSG00000175040	CHST2	3	143119331	143124014	+	4582	protein_coding	carbohydrate sulfotransferase 2 [Source:HGNC Symbol;Acc:HGNC:1970]	-	10.33	17.26	-0.652941	0.000209418	0.0353226
ENSG00000157168	NRG1	8	31639386	32767959	+	11328	protein_coding	neuregulin 1 [Source:HGNC Symbol;Acc:HGNC:7997]	-	1.86	0.94	0.889529	0.000249651	0.0416357
ENSG00000099250	NRP1	10	33177492	33336262	-	11522	protein_coding	neuropilin 1 [Source:HGNC Symbol;Acc:HGNC:8004]	-	0.06	0.17	-1.11943	0.00025607	0.0419897
ENSG00000237667	LINC01115	2	779840	868608	-	3201	lincRNA	long intergenic non-protein coding RNA 1115 [Source:HGNC Symbol;Acc:HGNC:49258]	-	0.42	1.61	-1.26601	0.000257432	0.0419897
ENSG00000263069	AC124319.2	17	80351828	80415168	-	3983	antisense	uncharacterized LOC100294362 [Source:NCBI gene;Acc:100294362]	-	0.07	0.28	-1.26209	0.000278963	0.044644
ENSG00000198756	COLGALT2	1	183929854	184037729	-	7806	protein_coding	collagen beta(1-O)galactosyltransferase 2 [Source:HGNC Symbol;Acc:HGNC:16790]	-	0.65	1.14	-0.720318	0.00027972	0.044644
ENSG00000145476	CYP4V2	4	186191520	186213456	+	9807	protein_coding	cytochrome P450 family 4 subfamily V member 2 [Source:HGNC Symbol;Acc:HGNC:23198]	-	3	1.81	0.699632	0.000299154	0.0472377
ENSG00000169249	ZRSR2	X	15790472	15823260	+	2077	protein_coding	zinc finger CCCH-type, RNA binding motif and serine/arginine rich 2 [Source:HGNC Symbol;Acc:HGNC:23019]	-	12.99	19.16	-0.501714	0.000303755	0.0474594
ENSG00000167618	LAIR2	19	54497879	54510687	+	1078	protein_coding	leukocyte associated immunoglobulin like receptor 2 [Source:HGNC Symbol;Acc:HGNC:6478]	-	5.91	14.41	-1.01181	0.000314531	0.048314
ENSG00000280350	LINC01726	20	21610787	21703585	-	1253	lincRNA	long intergenic non-protein coding RNA 1726 [Source:HGNC Symbol;Acc:HGNC:52514]	-	0.4	1.37	-1.20462	0.000315735	0.048314
ENSG00000221957	KIR2DS4	19	54832676	54848569	+	1608	polymorphic_pseudogene	killer cell immunoglobulin like receptor, two Ig domains and short cytoplasmic tail 4 [Source:HGNC Symbol;Acc:HGNC:6336]	-	2.48	5.69	-0.960378	0.000334778	0.0503595
ENSG00000002726	AOC1	7	150824627	150861504	+	3824	protein_coding	amine oxidase, copper containing 1 [Source:HGNC Symbol;Acc:HGNC:80]	-	0.1	0.91	-1.30183	0.000335888	0.0503595
ENSG00000171812	COL8A2	1	36095236	36125220	-	4670	protein_coding	collagen type VIII alpha 2 chain [Source:HGNC Symbol;Acc:HGNC:2216]	-	1.49	0.86	0.760045	0.000358197	0.0531671
ENSG00000146072	TNFRSF21	6	47231532	47309905	-	3595	protein_coding	TNF receptor superfamily member 21 [Source:HGNC Symbol;Acc:HGNC:13469]	-	0.4	0.9	-0.939024	0.000379631	0.055641
ENSG00000211795	TRAV8-6	14	21978459	21979120	+	561	TR_V_gene	T cell receptor alpha variable 8-6 [Source:HGNC Symbol;Acc:HGNC:12151]	-	4.2	10.56	-1.04084	0.000382361	0.055641
ENSG00000117013	KCNQ4	1	40783814	40840452	+	4381	protein_coding	potassium voltage-gated channel subfamily Q member 4 [Source:HGNC Symbol;Acc:HGNC:6298]	-	0.27	0.08	1.20284	0.000430797	0.0620807
ENSG00000103042	SLC38A7	16	58665109	58685104	-	6991	protein_coding	solute carrier family 38 member 7 [Source:HGNC Symbol;Acc:HGNC:25582]	-	2.55	1.77	0.541472	0.00047465	0.0661258
ENSG00000179915	NRXN1	2	49918505	51225575	-	24320	protein_coding	neurexin 1 [Source:HGNC Symbol;Acc:HGNC:8008]	-	0.03	0.09	-1.07492	0.000475759	0.0661258
ENSG00000261222	AC064805.1	17	74599840	74607229	+	3602	lincRNA	novel transcript	-	5.46	3.28	0.715554	0.000480633	0.0661258
ENSG00000186815	TPCN1	12	113221050	113298585	+	8728	protein_coding	two pore segment channel 1 [Source:HGNC Symbol;Acc:HGNC:18182]	-	10.23	6.7	0.609109	0.000480879	0.0661258
ENSG00000166963	MAP1A	15	43510958	43531620	+	10629	protein_coding	microtubule associated protein 1A [Source:HGNC Symbol;Acc:HGNC:6835]	-	0.62	1.18	-0.790678	0.000481142	0.0661258
ENSG00000145014	TMEM44	3	194587673	194633689	-	4561	protein_coding	transmembrane protein 44 [Source:HGNC Symbol;Acc:HGNC:25120]	-	0.19	0.53	-1.07609	0.000486588	0.0662608
ENSG00000196502	SULT1A1	16	28605196	28623625	-	8909	protein_coding	sulfotransferase family 1A member 1 [Source:HGNC Symbol;Acc:HGNC:11453]	-	14.63	10.69	0.475656	0.000534421	0.0714766
ENSG00000105641	SLC5A5	19	17871973	17895174	+	3652	protein_coding	solute carrier family 5 member 5 [Source:HGNC Symbol;Acc:HGNC:11040]	-	0.48	0.18	1.07003	0.000534521	0.0714766
ENSG00000198178	CLEC4C	12	7729415	7751605	-	1551	protein_coding	C-type lectin domain family 4 member C [Source:HGNC Symbol;Acc:HGNC:13258]	-	0.9	3.28	-1.18231	0.000636508	0.0843544
ENSG00000183780	SLC35F3	1	233904933	234324516	+	3195	protein_coding	solute carrier family 35 member F3 [Source:HGNC Symbol;Acc:HGNC:23616]	-	0.14	0.51	-1.18534	0.000649055	0.085256
ENSG00000100427	MLC1	22	50059391	50085902	-	4297	protein_coding	megalencephalic leukoencephalopathy with subcortical cysts 1 [Source:HGNC Symbol;Acc:HGNC:17082]	-	4.14	6.51	-0.577839	0.000673304	0.085705
ENSG00000136002	ARHGEF4	2	130836916	131047263	+	10611	protein_coding	Rho guanine nucleotide exchange factor 4 [Source:HGNC Symbol;Acc:HGNC:684]	-	0.77	0.46	0.694879	0.000678056	0.085705
ENSG00000221866	PLXNA4	7	132123332	132648688	-	16372	protein_coding	plexin A4 [Source:HGNC Symbol;Acc:HGNC:9102]	-	0.14	0.39	-1.07969	0.000683286	0.085705
ENSG00000228463	AP006222.1	1	257864	359681	-	8224	transcribed_processed_pseudogene	ribosomal protein L23a (RPL23A) pseudogene	-	0.16	0.46	-1.09845	0.000690944	0.085705
ENSG00000211777	TRAV3	14	21723713	21724321	+	519	TR_V_gene	T cell receptor alpha variable 3 (gene/pseudogene) [Source:HGNC Symbol;Acc:HGNC:12128]	-	4.58	9.02	-0.818991	0.00069181	0.085705
ENSG00000133048	CHI3L1	1	203178931	203186749	-	3408	protein_coding	chitinase 3 like 1 [Source:HGNC Symbol;Acc:HGNC:1932]	-	23.16	12.26	0.844649	0.000692568	0.085705
ENSG00000134755	DSC2	18	31058840	31102522	-	12495	protein_coding	desmocollin 2 [Source:HGNC Symbol;Acc:HGNC:3036]	-	2.71	4.39	-0.609677	0.000692892	0.085705
ENSG00000226281	AL031123.1	6	6692744	6739030	-	1317	lincRNA	novel transcript	-	6.99	3.55	0.868401	0.000706038	0.0866092
ENSG00000285635	AC021660.3	3	98521133	98585498	-	592	protein_coding	novel transcript	-	19.55	10.84	0.782147	0.0007565	0.0914136
ENSG00000050555	LAMC3	9	131009082	131094473	+	7594	protein_coding	laminin subunit gamma 3 [Source:HGNC Symbol;Acc:HGNC:6494]	-	0.16	0.05	1.14944	0.00075752	0.0914136
ENSG00000203814	HIST2H2BF	1	149782689	149812373	-	3196	protein_coding	histone cluster 2 H2B family member f [Source:HGNC Symbol;Acc:HGNC:24700]	-	5.91	8.7	-0.492888	0.000790543	0.0946293
ENSG00000257743	MGAM2	7	142111749	142222324	+	8162	protein_coding	maltase-glucoamylase 2 (putative) [Source:HGNC Symbol;Acc:HGNC:28101]	-	0.86	1.57	-0.731537	0.00081748	0.0962613
ENSG00000183307	TMEM121B	22	17116299	17121367	-	5069	protein_coding	transmembrane protein 121B [Source:HGNC Symbol;Acc:HGNC:1844]	-	4.06	2.87	0.515217	0.000825074	0.0962613
ENSG00000104951	IL4I1	19	49889654	49929539	-	2563	protein_coding	interleukin 4 induced 1 [Source:HGNC Symbol;Acc:HGNC:19094]	-	1.74	0.92	0.830011	0.00082781	0.0962613
ENSG00000177335	C8orf31	8	143039209	143059942	+	2929	processed_transcript	chromosome 8 open reading frame 31 (putative) [Source:HGNC Symbol;Acc:HGNC:26731]	-	0.85	0.39	0.953944	0.000830118	0.0962613
ENSG00000276241	AC243829.2	17	36116177	36177510	+	610	antisense	novel transcript, antisense TBC1D3B	-	11.78	26.98	-0.937055	0.000837386	0.0963513
ENSG00000120708	TGFBI	5	136028895	136063818	+	7810	protein_coding	transforming growth factor beta induced [Source:HGNC Symbol;Acc:HGNC:11771]	-	25.05	17.51	0.531917	0.000864096	0.0986598
ENSG00000280969	RPS4Y2	Y	20756164	20781032	+	792	protein_coding	ribosomal protein S4 Y-linked 2 [Source:HGNC Symbol;Acc:HGNC:18501]	-	0.51	0	1.10638	0.000897494	NA
ENSG00000100373	UPK3A	22	45284982	45295874	+	1051	protein_coding	uroplakin 3A [Source:HGNC Symbol;Acc:HGNC:12580]	-	1.77	0.72	1.02314	0.000931172	0.105507
ENSG00000249437	NAIP	5	70968483	71025114	-	9513	protein_coding	NLR family apoptosis inhibitory protein [Source:HGNC Symbol;Acc:HGNC:7634]	-	4.57	2.73	0.708723	0.000946894	0.106475
ENSG00000172037	LAMB2	3	49121114	49133118	-	6865	protein_coding	laminin subunit beta 2 [Source:HGNC Symbol;Acc:HGNC:6487]	-	1.26	0.59	0.914577	0.000975718	0.108235
ENSG00000211789	TRAV12-2	14	21887857	21888502	+	445	TR_V_gene	T cell receptor alpha variable 12-2 [Source:HGNC Symbol;Acc:HGNC:12106]	-	8.3	17.99	-0.903971	0.000977125	0.108235
ENSG00000103316	CRYM	16	21238874	21303083	-	3782	protein_coding	crystallin mu [Source:HGNC Symbol;Acc:HGNC:2418]	-	0.02	0.17	-1.20433	0.000991962	NA
ENSG00000170962	PDGFD	11	103907186	104164379	-	4266	protein_coding	platelet derived growth factor D [Source:HGNC Symbol;Acc:HGNC:30620]	-	1.25	3.02	-0.97904	0.000993828	0.108691
ENSG00000234456	MAGI2-AS3	7	79452877	79471208	+	11625	processed_transcript	MAGI2 antisense RNA 3 [Source:HGNC Symbol;Acc:HGNC:40862]	-	0.05	0.22	-1.19039	0.000995888	0.108691
ENSG00000146674	IGFBP3	7	45912245	45921874	-	4571	protein_coding	insulin like growth factor binding protein 3 [Source:HGNC Symbol;Acc:HGNC:5472]	-	0.66	1.35	-0.844663	0.00100857	0.109271
ENSG00000178695	KCTD12	13	76880166	76886390	-	6225	protein_coding	potassium channel tetramerization domain containing 12 [Source:HGNC Symbol;Acc:HGNC:14678]	-	37.88	25.34	0.582014	0.00102495	0.10987
ENSG00000133105	RXFP2	13	31739542	31803388	+	3319	protein_coding	relaxin family peptide receptor 2 [Source:HGNC Symbol;Acc:HGNC:17318]	-	1.92	0.76	1.03461	0.0010289	0.10987
ENSG00000105967	TFEC	7	115935148	116159896	-	8644	protein_coding	transcription factor EC [Source:HGNC Symbol;Acc:HGNC:11754]	bHLH	4.31	2.06	0.909722	0.00106035	0.11242
ENSG00000235636	NUS1P1	X	47512602	47513483	-	882	processed_pseudogene	NUS1 pseudogene 1 [Source:HGNC Symbol;Acc:HGNC:38472]	-	1.63	0.37	1.18954	0.00107759	0.113437
ENSG00000197355	UAP1L1	9	137077501	137084539	+	5283	protein_coding	UDP-N-acetylglucosamine pyrophosphorylase 1 like 1 [Source:HGNC Symbol;Acc:HGNC:28082]	-	6.31	4.26	0.572976	0.00109178	0.114122
ENSG00000263327	TAPT1-AS1	4	16226685	16320140	+	2763	antisense	TAPT1 antisense RNA 1 (head to head) [Source:HGNC Symbol;Acc:HGNC:26832]	-	4.81	3.28	0.554314	0.00110956	0.115169
ENSG00000185168	LINC00482	17	81303771	81309248	-	2197	lincRNA	long intergenic non-protein coding RNA 482 [Source:HGNC Symbol;Acc:HGNC:26816]	-	2.55	1.26	0.888321	0.00113514	0.11675
ENSG00000095932	SMIM24	19	3473986	3480542	-	1498	protein_coding	small integral membrane protein 24 [Source:HGNC Symbol;Acc:HGNC:37244]	-	4.62	2.52	0.793279	0.00114771	0.11675
ENSG00000105426	PTPRS	19	5158495	5340803	-	8565	protein_coding	protein tyrosine phosphatase, receptor type S [Source:HGNC Symbol;Acc:HGNC:9681]	-	0.69	1.13	-0.627604	0.00114839	0.11675
ENSG00000255026	AC136475.3	11	287305	288987	+	860	antisense	novel transcript	-	72.44	48.71	0.580986	0.00118181	0.118956
ENSG00000180061	TMEM150B	19	55312801	55334048	-	1713	protein_coding	transmembrane protein 150B [Source:HGNC Symbol;Acc:HGNC:34415]	-	15.65	7.86	0.866531	0.00118612	0.118956
ENSG00000137267	TUBB2A	6	3153669	3157526	-	1727	protein_coding	tubulin beta 2A class IIa [Source:HGNC Symbol;Acc:HGNC:12412]	-	0.4	1.92	-1.17592	0.00127007	0.125999
ENSG00000179242	CDH4	20	61252426	61940617	+	7351	protein_coding	cadherin 4 [Source:HGNC Symbol;Acc:HGNC:1763]	-	0.71	0.39	0.769992	0.00127331	0.125999
ENSG00000183813	CCR4	3	32951574	32956349	+	3095	protein_coding	C-C motif chemokine receptor 4 [Source:HGNC Symbol;Acc:HGNC:1605]	-	6.22	9.23	-0.506482	0.0012973	0.127509
ENSG00000164125	FAM198B	4	158124474	158173318	-	7880	protein_coding	family with sequence similarity 198 member B [Source:HGNC Symbol;Acc:HGNC:25312]	-	6.19	3.82	0.668925	0.00130613	0.127509
ENSG00000170345	FOS	14	75278774	75282230	+	3238	protein_coding	Fos proto-oncogene, AP-1 transcription factor subunit [Source:HGNC Symbol;Acc:HGNC:3796]	TF_bZIP	35.21	56.02	-0.580403	0.00131989	0.127509
ENSG00000127528	KLF2	19	16324817	16327874	+	2018	protein_coding	Kruppel like factor 2 [Source:HGNC Symbol;Acc:HGNC:6347]	zf-C2H2	340.89	464.41	-0.391321	0.0013314	0.127509
ENSG00000142173	COL6A2	21	46098097	46132849	+	5386	protein_coding	collagen type VI alpha 2 chain [Source:HGNC Symbol;Acc:HGNC:2212]	-	5.92	10.55	-0.705656	0.00133153	0.127509
ENSG00000231246	AL445426.1	1	112177234	112360528	-	547	lincRNA	novel transcript	-	2.65	5.96	-0.911087	0.00140665	0.133202
ENSG00000170873	MTSS1	8	124550790	124728429	-	7727	protein_coding	MTSS1, I-BAR domain containing [Source:HGNC Symbol;Acc:HGNC:20443]	-	1.58	2.36	-0.516071	0.00140893	0.133202
ENSG00000262370	AC108134.3	16	3076911	3087100	-	1326	lincRNA	uncharacterized LOC105371058 [Source:NCBI gene;Acc:105371058]	-	12.1	7.63	0.642094	0.00142769	0.13364
ENSG00000154734	ADAMTS1	21	26835747	26845409	-	7063	protein_coding	ADAM metallopeptidase with thrombospondin type 1 motif 1 [Source:HGNC Symbol;Acc:HGNC:217]	-	0.25	0.55	-0.89854	0.00143157	0.13364
ENSG00000179455	MKRN3	15	23565674	23630075	+	5735	protein_coding	makorin ring finger protein 3 [Source:HGNC Symbol;Acc:HGNC:7114]	-	0.29	0.08	1.12872	0.00154661	0.143477
ENSG00000169583	CLIC3	9	136994635	136996803	-	1177	protein_coding	chloride intracellular channel 3 [Source:HGNC Symbol;Acc:HGNC:2064]	-	8.97	18.78	-0.856635	0.00158019	0.145682
ENSG00000183019	MCEMP1	19	7676628	7679826	+	1906	protein_coding	mast cell expressed membrane protein 1 [Source:HGNC Symbol;Acc:HGNC:27291]	-	3.73	1.98	0.811796	0.00161114	0.147618
ENSG00000206159	GYG2P1	Y	12354416	12420456	-	2159	transcribed_unprocessed_pseudogene	glycogenin 2 pseudogene 1 [Source:HGNC Symbol;Acc:HGNC:4701]	-	0.2	0	1.05682	0.00162849	NA
ENSG00000204179	PTPN20	10	46911396	47002488	+	4506	protein_coding	protein tyrosine phosphatase, non-receptor type 20 [Source:HGNC Symbol;Acc:HGNC:23423]	-	0.22	0.06	1.12937	0.00168278	0.153237
ENSG00000172348	RCAN2	6	46220736	46491972	-	3712	protein_coding	regulator of calcineurin 2 [Source:HGNC Symbol;Acc:HGNC:3041]	-	0.16	0.62	-1.12931	0.00170704	0.154498
ENSG00000119457	SLC46A2	9	112878920	112890913	-	2502	protein_coding	solute carrier family 46 member 2 [Source:HGNC Symbol;Acc:HGNC:16055]	-	7.01	3.9	0.774407	0.00173492	0.156069
ENSG00000184232	OAF	11	120210767	120230332	+	3176	protein_coding	out at first homolog [Source:HGNC Symbol;Acc:HGNC:28752]	-	9.01	5.33	0.713729	0.00175276	0.156536
ENSG00000179532	DNHD1	11	6497260	6593758	+	19629	protein_coding	dynein heavy chain domain 1 [Source:HGNC Symbol;Acc:HGNC:26532]	-	2.56	1.9	0.45159	0.0017612	0.156536
ENSG00000166444	ST5	11	8693351	8910951	-	14262	protein_coding	suppression of tumorigenicity 5 [Source:HGNC Symbol;Acc:HGNC:11350]	-	0.01	0.07	-1.11845	0.00177211	0.156568
ENSG00000284690	CD300H	17	74560701	74567343	-	606	polymorphic_pseudogene	CD300H molecule (gene/pseudogene) [Source:HGNC Symbol;Acc:HGNC:52292]	-	61.18	36.71	0.703171	0.00188634	0.165648
ENSG00000005020	SKAP2	7	26667062	26995239	-	5520	protein_coding	src kinase associated phosphoprotein 2 [Source:HGNC Symbol;Acc:HGNC:15687]	-	26.45	36.42	-0.404305	0.0018972	0.165648
ENSG00000204103	MAFB	20	40685848	40689240	-	3393	protein_coding	MAF bZIP transcription factor B [Source:HGNC Symbol;Acc:HGNC:6408]	TF_bZIP	21.9	16.69	0.414819	0.00197259	0.171223
ENSG00000161179	YDJC	22	21628089	21630064	-	1754	protein_coding	YdjC chitooligosaccharide deacetylase homolog [Source:HGNC Symbol;Acc:HGNC:27158]	-	12.57	9.31	0.453478	0.00201547	0.173928
ENSG00000162510	MATN1	1	30711277	30723587	-	4606	protein_coding	matrilin 1 [Source:HGNC Symbol;Acc:HGNC:6907]	-	0.07	0	1.00777	0.00203459	NA
ENSG00000267123	LINC02081	17	78605233	78632155	-	4576	lincRNA	long intergenic non-protein coding RNA 2081 [Source:HGNC Symbol;Acc:HGNC:52930]	-	0.66	0.34	0.823113	0.00205169	0.17603
ENSG00000144354	CDCA7	2	173354820	173368997	+	3934	protein_coding	cell division cycle associated 7 [Source:HGNC Symbol;Acc:HGNC:14628]	-	0.55	1.17	-0.87222	0.00207597	0.176082
ENSG00000211959	IGHV4-39	14	106421711	106422218	-	425	IG_V_gene	immunoglobulin heavy variable 4-39 [Source:HGNC Symbol;Acc:HGNC:5651]	-	18.7	39.7	-0.868544	0.00207602	0.176082
ENSG00000224805	LINC00853	1	47179250	47180339	+	661	antisense	long intergenic non-protein coding RNA 853 [Source:HGNC Symbol;Acc:HGNC:43716]	-	0.8	2.41	-1.04464	0.00211125	0.178053
ENSG00000164626	KCNK5	6	39188973	39229450	-	3756	protein_coding	potassium two pore domain channel subfamily K member 5 [Source:HGNC Symbol;Acc:HGNC:6280]	-	0.05	0.21	-1.11442	0.00215483	0.180307
ENSG00000285756	BX890604.2	X	3817528	3937855	-	14235	lincRNA	novel transcript	-	0.63	0.99	-0.56645	0.00216604	0.180307
ENSG00000107551	RASSF4	10	44959407	44995891	+	9481	protein_coding	Ras association domain family member 4 [Source:HGNC Symbol;Acc:HGNC:20793]	-	7.6	4.96	0.606871	0.00217443	0.180307
ENSG00000156475	PPP2R2B	5	146581146	147084784	-	13206	protein_coding	protein phosphatase 2 regulatory subunit Bbeta [Source:HGNC Symbol;Acc:HGNC:9305]	-	0.29	0.49	-0.643356	0.00219777	0.18123
ENSG00000080986	NDC80	18	2571511	2616635	+	3600	protein_coding	NDC80, kinetochore complex component [Source:HGNC Symbol;Acc:HGNC:16909]	-	0.8	1.52	-0.760511	0.00230882	0.189336
ENSG00000213694	S1PR3	9	88990863	89005010	+	13578	protein_coding	sphingosine-1-phosphate receptor 3 [Source:HGNC Symbol;Acc:HGNC:3167]	-	1.63	0.79	0.871628	0.00240575	0.196201
ENSG00000145214	DGKQ	4	958887	986895	-	4970	protein_coding	diacylglycerol kinase theta [Source:HGNC Symbol;Acc:HGNC:2856]	-	17.9	13.76	0.402728	0.00248944	0.201198
ENSG00000110448	CD5	11	61102395	61127852	+	3221	protein_coding	CD5 molecule [Source:HGNC Symbol;Acc:HGNC:1685]	-	27.36	38.68	-0.438143	0.00249414	0.201198
ENSG00000161921	CXCL16	17	4733526	4739922	-	2794	protein_coding	C-X-C motif chemokine ligand 16 [Source:HGNC Symbol;Acc:HGNC:16642]	-	21.53	32.14	-0.504646	0.00255466	0.204966
ENSG00000251349	MSANTD3-TMEFF1	9	100442271	100577636	+	2069	protein_coding	MSANTD3-TMEFF1 readthrough [Source:HGNC Symbol;Acc:HGNC:38838]	-	0.82	1.55	-0.755998	0.00259937	0.207433
ENSG00000073737	DHRS9	2	169064789	169096167	+	3750	protein_coding	dehydrogenase/reductase 9 [Source:HGNC Symbol;Acc:HGNC:16888]	-	8.56	13.49	-0.564471	0.00269311	0.213764
ENSG00000182379	NXPH4	12	57216795	57226449	+	2150	protein_coding	neurexophilin 4 [Source:HGNC Symbol;Acc:HGNC:8078]	-	0.86	1.62	-0.749715	0.00272553	0.215186
ENSG00000141744	PNMT	17	39667981	39670475	+	1457	protein_coding	phenylethanolamine N-methyltransferase [Source:HGNC Symbol;Acc:HGNC:9160]	-	0.5	0.13	1.08518	0.00273721	NA
ENSG00000130176	CNN1	19	11538717	11550323	+	2887	protein_coding	calponin 1 [Source:HGNC Symbol;Acc:HGNC:2155]	-	0	0.13	-1.01122	0.00274237	NA
ENSG00000242258	LINC00996	7	150433654	150448140	+	2171	lincRNA	long intergenic non-protein coding RNA 996 [Source:HGNC Symbol;Acc:HGNC:27800]	-	1.72	3.06	-0.702473	0.00284103	0.223118
ENSG00000164253	WDR41	5	77425970	77620611	-	7230	protein_coding	WD repeat domain 41 [Source:HGNC Symbol;Acc:HGNC:25601]	-	2.86	2.12	0.44957	0.0028574	0.223223
ENSG00000148814	LRRC27	10	132332154	132379918	+	9910	protein_coding	leucine rich repeat containing 27 [Source:HGNC Symbol;Acc:HGNC:29346]	-	1.01	0.71	0.518097	0.00299219	0.232529
ENSG00000105472	CLEC11A	19	50723329	50725718	+	1469	protein_coding	C-type lectin domain containing 11A [Source:HGNC Symbol;Acc:HGNC:10576]	-	3.07	1.81	0.707118	0.00307354	0.237607
ENSG00000091986	CCDC80	3	112596794	112649530	-	13071	protein_coding	coiled-coil domain containing 80 [Source:HGNC Symbol;Acc:HGNC:30649]	-	0.01	0.05	-1.05924	0.0030748	NA
ENSG00000033867	SLC4A7	3	27372721	27484420	-	9616	protein_coding	solute carrier family 4 member 7 [Source:HGNC Symbol;Acc:HGNC:11033]	-	4.29	5.89	-0.402379	0.00317536	0.243596
ENSG00000260565	ERVK13-1	16	2660349	2673444	-	8966	processed_transcript	endogenous retrovirus group K13 member 1 [Source:HGNC Symbol;Acc:HGNC:27548]	-	2.06	1.55	0.436135	0.00318393	0.243596
ENSG00000123213	NLN	5	65722196	65871725	+	10948	protein_coding	neurolysin [Source:HGNC Symbol;Acc:HGNC:16058]	-	1.06	0.7	0.574533	0.00320025	0.243596
ENSG00000059915	PSD	10	102402617	102421539	-	6338	protein_coding	pleckstrin and Sec7 domain containing [Source:HGNC Symbol;Acc:HGNC:9507]	-	0.55	0.31	0.740887	0.00322867	0.243607
ENSG00000134827	TCN1	11	59852800	59866575	-	1586	protein_coding	transcobalamin 1 [Source:HGNC Symbol;Acc:HGNC:11652]	-	3.71	6.67	-0.700653	0.00323321	0.243607
ENSG00000121743	GJA3	13	20138255	20161049	-	5211	protein_coding	gap junction protein alpha 3 [Source:HGNC Symbol;Acc:HGNC:4277]	-	0.04	0.16	-1.06979	0.00325983	0.244372
ENSG00000130021	PUDP	X	7048920	7148190	-	3168	protein_coding	pseudouridine 5'-phosphatase [Source:HGNC Symbol;Acc:HGNC:16818]	-	3.51	5	-0.449447	0.00335918	0.250327
ENSG00000102804	TSC22D1	13	44432143	44577147	-	8586	protein_coding	TSC22 domain family member 1 [Source:HGNC Symbol;Acc:HGNC:16826]	TSC22	4.07	6.1	-0.504967	0.003373	0.250327
ENSG00000175544	CABP4	11	67452406	67460313	+	3786	protein_coding	calcium binding protein 4 [Source:HGNC Symbol;Acc:HGNC:1386]	-	0.56	1.02	-0.72198	0.0034392	0.25397
ENSG00000132535	DLG4	17	7187169	7219841	-	10317	protein_coding	discs large MAGUK scaffold protein 4 [Source:HGNC Symbol;Acc:HGNC:2903]	-	1.99	1.3	0.595833	0.00348921	0.256388
ENSG00000133067	LGR6	1	202193901	202319781	+	4583	protein_coding	leucine rich repeat containing G protein-coupled receptor 6 [Source:HGNC Symbol;Acc:HGNC:19719]	-	2.86	5.12	-0.69634	0.00350895	0.256568
ENSG00000128604	IRF5	7	128937612	128950035	+	4375	protein_coding	interferon regulatory factor 5 [Source:HGNC Symbol;Acc:HGNC:6120]	IRF	16.55	11.45	0.536532	0.00353976	0.257552
ENSG00000111961	SASH1	6	148272304	148552050	+	11143	protein_coding	SAM and SH3 domain containing 1 [Source:HGNC Symbol;Acc:HGNC:19182]	-	0.85	0.57	0.580115	0.0036095	0.261346
ENSG00000273270	AC090114.2	7	128524016	128531069	-	7054	lincRNA	novel transcript	-	0.41	0.71	-0.668003	0.00366547	0.263028
ENSG00000198561	CTNND1	11	57753243	57819546	+	8798	protein_coding	catenin delta 1 [Source:HGNC Symbol;Acc:HGNC:2515]	-	4.6	3.53	0.408846	0.00367163	0.263028
ENSG00000006757	PNPLA4	X	7898247	7927739	-	3441	protein_coding	patatin like phospholipase domain containing 4 [Source:HGNC Symbol;Acc:HGNC:24887]	-	0.75	1.3	-0.662544	0.0036859	0.263028
ENSG00000262730	AC104581.2	17	7925931	7930622	-	348	protein_coding	novel transcript	-	1.78	0.42	1.06113	0.00369556	NA
ENSG00000120262	CCDC170	6	151494030	151621193	+	5419	protein_coding	coiled-coil domain containing 170 [Source:HGNC Symbol;Acc:HGNC:21177]	-	1.79	0.85	0.869299	0.00384839	0.272079
ENSG00000059804	SLC2A3	12	7919230	7936275	-	6159	protein_coding	solute carrier family 2 member 3 [Source:HGNC Symbol;Acc:HGNC:11007]	-	40.31	67.47	-0.624021	0.0038494	0.272079
ENSG00000241399	CD302	2	159768630	159798255	-	4075	protein_coding	CD302 molecule [Source:HGNC Symbol;Acc:HGNC:30843]	-	7.35	5.39	0.466965	0.00396774	0.277861
ENSG00000160013	PTGIR	19	46620468	46625118	-	3546	protein_coding	prostaglandin I2 receptor [Source:HGNC Symbol;Acc:HGNC:9602]	-	5.91	4.46	0.427653	0.00398585	0.277861
ENSG00000148158	SNX30	9	112750838	112881671	+	11578	protein_coding	sorting nexin family member 30 [Source:HGNC Symbol;Acc:HGNC:23685]	-	4.85	3.73	0.405011	0.00399635	0.277861
ENSG00000187164	SHTN1	10	116881482	117126586	-	8247	protein_coding	shootin 1 [Source:HGNC Symbol;Acc:HGNC:29319]	-	1.11	0.6	0.775165	0.00401017	0.277861
ENSG00000134668	SPOCD1	1	31790422	31816051	-	7085	protein_coding	SPOC domain containing 1 [Source:HGNC Symbol;Acc:HGNC:26338]	-	0.41	0.77	-0.73793	0.00402479	0.277861
ENSG00000176490	DIRAS1	19	2714567	2721418	-	3485	protein_coding	DIRAS family GTPase 1 [Source:HGNC Symbol;Acc:HGNC:19127]	-	0.16	0.43	-0.945978	0.00409907	0.281678
ENSG00000132514	CLEC10A	17	7074537	7080307	-	2469	protein_coding	C-type lectin domain containing 10A [Source:HGNC Symbol;Acc:HGNC:16916]	-	9.57	6.14	0.60863	0.00413741	0.283002
ENSG00000101751	POLI	18	54269404	54321266	+	9471	protein_coding	DNA polymerase iota [Source:HGNC Symbol;Acc:HGNC:9182]	-	2.83	2.11	0.446	0.00417762	0.284442
ENSG00000135898	GPR55	2	230907318	230961066	-	4130	protein_coding	G protein-coupled receptor 55 [Source:HGNC Symbol;Acc:HGNC:4511]	-	1.72	3.17	-0.728982	0.00422123	0.285349
ENSG00000211652	IGLV7-43	22	22395018	22395489	+	385	IG_V_gene	immunoglobulin lambda variable 7-43 [Source:HGNC Symbol;Acc:HGNC:5929]	-	16.99	5.94	1.00255	0.00424145	0.285349
ENSG00000161643	SIGLEC16	19	49969673	49975814	+	2510	transcribed_unprocessed_pseudogene	sialic acid binding Ig like lectin 16 (gene/pseudogene) [Source:HGNC Symbol;Acc:HGNC:24851]	-	2.15	1.24	0.720136	0.00424861	0.285349
ENSG00000197558	SSPO	7	149776042	149833979	+	21144	protein_coding	SCO-spondin [Source:HGNC Symbol;Acc:HGNC:21998]	-	0.33	0.2	0.677833	0.00428083	0.286008
ENSG00000171954	CYP4F22	19	15508493	15552317	+	2644	protein_coding	cytochrome P450 family 4 subfamily F member 22 [Source:HGNC Symbol;Acc:HGNC:26820]	-	1.28	2.51	-0.782629	0.00429696	0.286008
ENSG00000158062	UBXN11	1	26281328	26318363	-	4704	protein_coding	UBX domain protein 11 [Source:HGNC Symbol;Acc:HGNC:30600]	-	22.42	14.46	0.609428	0.00433845	0.287481
ENSG00000176595	KBTBD11	8	1973878	2006936	+	6710	protein_coding	kelch repeat and BTB domain containing 11 [Source:HGNC Symbol;Acc:HGNC:29104]	-	4.41	3.35	0.424389	0.00437138	0.288375
ENSG00000117281	CD160	1	145719471	145739288	+	3971	protein_coding	CD160 molecule [Source:HGNC Symbol;Acc:HGNC:17013]	-	3.42	6.84	-0.796647	0.00447924	0.294183
ENSG00000285544	AC115220.2	7	64045429	64114556	+	1881	processed_transcript	novel transcript	-	0.1	0.43	-1.03619	0.00451834	0.295444
ENSG00000135862	LAMC1	1	183023460	183145592	+	8406	protein_coding	laminin subunit gamma 1 [Source:HGNC Symbol;Acc:HGNC:6492]	-	0.97	0.67	0.538367	0.00454322	0.295768
ENSG00000131686	CA6	1	8945867	8975092	+	2662	protein_coding	carbonic anhydrase 6 [Source:HGNC Symbol;Acc:HGNC:1380]	-	4.28	2.9	0.558329	0.00456845	0.296112
ENSG00000167850	CD300C	17	74541108	74546143	-	1517	protein_coding	CD300c molecule [Source:HGNC Symbol;Acc:HGNC:19320]	-	15.61	11.42	0.468996	0.00459115	0.296289
ENSG00000174482	LINGO2	9	27948078	28670286	-	3480	protein_coding	leucine rich repeat and Ig domain containing 2 [Source:HGNC Symbol;Acc:HGNC:21207]	-	0.13	0.35	-0.965185	0.00465245	0.297453
ENSG00000182566	CLEC4G	19	7728957	7733906	-	1754	protein_coding	C-type lectin domain family 4 member G [Source:HGNC Symbol;Acc:HGNC:24591]	-	0.52	0.1	1.02681	0.00465443	0.297453
ENSG00000158373	HIST1H2BD	6	26158146	26171349	+	871	protein_coding	histone cluster 1 H2B family member d [Source:HGNC Symbol;Acc:HGNC:4747]	-	3.92	7.87	-0.786978	0.004684	0.297453
ENSG00000173372	C1QA	1	22636506	22639608	+	1272	protein_coding	complement C1q A chain [Source:HGNC Symbol;Acc:HGNC:1241]	-	1.71	3.42	-0.795814	0.00468935	0.297453
ENSG00000188322	SBK1	16	28292519	28323849	+	4992	protein_coding	SH3 domain binding kinase 1 [Source:HGNC Symbol;Acc:HGNC:17699]	-	8.39	12	-0.450177	0.00472232	0.29827
ENSG00000168329	CX3CR1	3	39263494	39281735	-	3655	protein_coding	C-X3-C motif chemokine receptor 1 [Source:HGNC Symbol;Acc:HGNC:2558]	-	67.2	93.18	-0.415628	0.00481588	0.30289
ENSG00000167123	CERCAM	9	128411751	128437351	+	6059	protein_coding	cerebral endothelial cell adhesion molecule [Source:HGNC Symbol;Acc:HGNC:23723]	-	0.45	0.75	-0.621562	0.00485749	0.304218
ENSG00000122674	CCZ1	7	5898725	5926550	+	6431	protein_coding	CCZ1 homolog, vacuolar protein trafficking and biogenesis associated [Source:HGNC Symbol;Acc:HGNC:21691]	-	2.59	1.73	0.573819	0.00501087	0.312506
ENSG00000283602	AC116353.5	5	140569962	140594570	-	2089	transcribed_unitary_pseudogene	novel pseudogene	-	0.39	0.1	1.02208	0.00506459	0.314534
ENSG00000165092	ALDH1A1	9	72900662	73080442	-	2849	protein_coding	aldehyde dehydrogenase 1 family member A1 [Source:HGNC Symbol;Acc:HGNC:402]	-	9.09	6.72	0.452422	0.00516045	0.319153
ENSG00000106571	GLI3	7	41960950	42237870	-	10950	protein_coding	GLI family zinc finger 3 [Source:HGNC Symbol;Acc:HGNC:4319]	zf-C2H2	0.01	0.08	-1.00181	0.00524412	0.322981
ENSG00000187017	ESPN	1	6424776	6461367	+	6952	protein_coding	espin [Source:HGNC Symbol;Acc:HGNC:13281]	-	2.69	1.4	0.789548	0.00529026	0.324477
ENSG00000229656	ITGB1-DT	10	32958845	33082102	+	1193	lincRNA	ITGB1 divergent transcript [Source:HGNC Symbol;Acc:HGNC:53718]	-	3.03	5.28	-0.670357	0.00532772	0.325429
ENSG00000264538	SUZ12P1	17	30709299	30790908	+	3776	transcribed_unprocessed_pseudogene	SUZ12 pseudogene 1 [Source:HGNC Symbol;Acc:HGNC:32421]	-	3.15	2.21	0.511631	0.00538382	0.326635
ENSG00000095209	TMEM38B	9	105694544	105776612	+	4511	protein_coding	transmembrane protein 38B [Source:HGNC Symbol;Acc:HGNC:25535]	-	1.28	1.94	-0.522805	0.00539146	0.326635
ENSG00000197253	TPSB2	16	1227272	1230184	-	1738	protein_coding	tryptase beta 2 (gene/pseudogene) [Source:HGNC Symbol;Acc:HGNC:14120]	-	0.03	0.27	-0.980252	0.00542653	NA
ENSG00000197903	HIST1H2BK	6	27146418	27146798	-	381	protein_coding	histone cluster 1 H2B family member k [Source:HGNC Symbol;Acc:HGNC:13954]	-	60.44	88.37	-0.475746	0.00543074	0.327677
ENSG00000164403	SHROOM1	5	132822141	132830898	-	4420	protein_coding	shroom family member 1 [Source:HGNC Symbol;Acc:HGNC:24084]	-	4.07	2.56	0.628165	0.00545676	0.327914
ENSG00000198892	SHISA4	1	201888680	201892306	+	1746	protein_coding	shisa family member 4 [Source:HGNC Symbol;Acc:HGNC:27139]	-	4.12	6.26	-0.523965	0.00557347	0.333577
ENSG00000162572	SCNN1D	1	1280436	1292029	+	4025	protein_coding	sodium channel epithelial 1 delta subunit [Source:HGNC Symbol;Acc:HGNC:10601]	-	1.63	1.11	0.54088	0.00561978	0.334997
ENSG00000248360	LINC00504	4	14470465	14888169	-	5095	lincRNA	long intergenic non-protein coding RNA 504 [Source:HGNC Symbol;Acc:HGNC:43555]	-	0.1	0.26	-0.90152	0.00567177	0.33565
ENSG00000149418	ST14	11	130159562	130210376	+	4350	protein_coding	suppression of tumorigenicity 14 [Source:HGNC Symbol;Acc:HGNC:11344]	-	8.97	6.1	0.553083	0.00567595	0.33565
ENSG00000188747	NOXA1	9	137423350	137434406	+	1678	protein_coding	NADPH oxidase activator 1 [Source:HGNC Symbol;Acc:HGNC:10668]	-	8.24	5.61	0.548885	0.00573401	0.337368
ENSG00000096006	CRISP3	6	49727384	49744437	-	2247	protein_coding	cysteine rich secretory protein 3 [Source:HGNC Symbol;Acc:HGNC:16904]	-	1.27	0.72	0.721158	0.00576739	0.337368
ENSG00000070404	FSTL3	19	676365	683399	+	3067	protein_coding	follistatin like 3 [Source:HGNC Symbol;Acc:HGNC:3973]	-	2.56	1.46	0.724074	0.0057732	0.337368
ENSG00000270276	HIST2H4B	1	149854045	149861210	-	1929	protein_coding	histone cluster 2 H4 family member b [Source:HGNC Symbol;Acc:HGNC:29607]	-	0.27	0.7	-0.913844	0.00584264	0.340088
ENSG00000077984	CST7	20	24949230	24959928	+	930	protein_coding	cystatin F [Source:HGNC Symbol;Acc:HGNC:2479]	-	110.95	157.58	-0.442192	0.00590402	0.341628
ENSG00000215788	TNFRSF25	1	6460786	6466195	-	4283	protein_coding	TNF receptor superfamily member 25 [Source:HGNC Symbol;Acc:HGNC:11910]	-	14.4	11.23	0.38566	0.00593507	0.341628
ENSG00000106113	CRHR2	7	30651943	30700129	-	3984	protein_coding	corticotropin releasing hormone receptor 2 [Source:HGNC Symbol;Acc:HGNC:2358]	-	0.6	0.31	0.801726	0.00597144	0.341628
ENSG00000167608	TMC4	19	54160108	54173250	-	3062	protein_coding	transmembrane channel like 4 [Source:HGNC Symbol;Acc:HGNC:22998]	-	1.05	1.94	-0.723897	0.00597738	0.341628
ENSG00000211753	TRBV28	7	142720660	142721160	+	364	TR_V_gene	T cell receptor beta variable 28 [Source:HGNC Symbol;Acc:HGNC:12209]	-	18.17	37.23	-0.808086	0.00598419	0.341628
ENSG00000160307	S100B	21	46598962	46605208	-	1448	protein_coding	S100 calcium binding protein B [Source:HGNC Symbol;Acc:HGNC:10500]	-	1.35	3.43	-0.912277	0.00607897	0.344614
ENSG00000174705	SH3PXD2B	5	172325000	172454523	-	8242	protein_coding	SH3 and PX domains 2B [Source:HGNC Symbol;Acc:HGNC:29242]	-	0.33	0.17	0.801512	0.00608293	0.344614
ENSG00000187808	SOWAHD	X	119758613	119760164	+	1552	protein_coding	sosondowah ankyrin repeat domain family member D [Source:HGNC Symbol;Acc:HGNC:32960]	-	12.43	8.49	0.548758	0.00623507	0.35189
ENSG00000126012	KDM5C	X	53191321	53225422	-	8727	protein_coding	lysine demethylase 5C [Source:HGNC Symbol;Acc:HGNC:11114]	ARID	18.68	25.76	-0.402517	0.00630393	0.354429
ENSG00000047634	SCML1	X	17737449	17754988	+	5497	protein_coding	Scm polycomb group protein like 1 [Source:HGNC Symbol;Acc:HGNC:10580]	-	2.65	1.75	0.587267	0.00636205	0.354722
ENSG00000285103	AL451123.1	9	27529085	27543902	+	9804	antisense	novel transcript	-	1.69	1.21	0.497741	0.00636609	0.354722
ENSG00000149256	TENM4	11	78652831	79440948	-	16330	protein_coding	teneurin transmembrane protein 4 [Source:HGNC Symbol;Acc:HGNC:29945]	-	0.07	0.02	0.958117	0.0063827	0.354722
ENSG00000211747	TRBV20-1	7	142626649	142627399	+	413	TR_V_gene	T cell receptor beta variable 20-1 [Source:HGNC Symbol;Acc:HGNC:12196]	-	20.85	36.31	-0.669414	0.00640474	0.354722
ENSG00000254119	AC025524.2	8	61785047	61944180	+	3155	lincRNA	uncharacterized LOC101929628 [Source:NCBI gene;Acc:101929628]	-	0.11	0.42	-0.992679	0.00644515	0.355633
ENSG00000147155	EBP	X	48521158	48528716	+	2409	protein_coding	EBP, cholestenol delta-isomerase [Source:HGNC Symbol;Acc:HGNC:3133]	-	5.05	7.28	-0.461985	0.00667494	0.366949
ENSG00000155465	SLC7A7	14	22773222	22829820	-	5131	protein_coding	solute carrier family 7 member 7 [Source:HGNC Symbol;Acc:HGNC:11065]	-	27.35	20.2	0.456255	0.00672028	0.368078
ENSG00000234076	TPRG1-AS1	3	188941715	188947639	-	697	lincRNA	TPRG1 antisense RNA 1 [Source:HGNC Symbol;Acc:HGNC:42391]	-	0.94	0.22	0.990399	0.00677827	NA
ENSG00000166548	TK2	16	66508003	66552544	-	7169	protein_coding	thymidine kinase 2, mitochondrial [Source:HGNC Symbol;Acc:HGNC:11831]	-	0.72	0.43	0.681779	0.00682423	0.370343
ENSG00000249937	LINC02223	5	17684584	17955857	+	6144	lincRNA	long intergenic non-protein coding RNA 2223 [Source:HGNC Symbol;Acc:HGNC:53092]	-	0.05	0.17	-0.965741	0.00683618	0.370343
ENSG00000130164	LDLR	19	11089362	11133816	+	7718	protein_coding	low density lipoprotein receptor [Source:HGNC Symbol;Acc:HGNC:6547]	-	1.69	2.36	-0.424065	0.00683648	0.370343
ENSG00000171208	NETO2	16	47077703	47143997	-	7481	protein_coding	neuropilin and tolloid like 2 [Source:HGNC Symbol;Acc:HGNC:14644]	-	1.06	0.66	0.627193	0.00690967	0.372946
ENSG00000000971	CFH	1	196651878	196747504	+	8145	protein_coding	complement factor H [Source:HGNC Symbol;Acc:HGNC:4883]	-	1	0.54	0.760295	0.00700059	0.376485
ENSG00000105383	CD33	19	51225064	51243860	+	5975	protein_coding	CD33 molecule [Source:HGNC Symbol;Acc:HGNC:1659]	-	10.83	6.66	0.64743	0.00706457	0.378554
ENSG00000130741	EIF2S3	X	24054716	24077971	+	3472	protein_coding	eukaryotic translation initiation factor 2 subunit gamma [Source:HGNC Symbol;Acc:HGNC:3267]	-	48.59	62.87	-0.320074	0.00715814	0.382188
ENSG00000124466	LYPD3	19	43460787	43465660	-	2519	protein_coding	LY6/PLAUR domain containing 3 [Source:HGNC Symbol;Acc:HGNC:24880]	-	0.26	0.62	-0.875965	0.00723546	0.383695
ENSG00000074416	MGLL	3	127689062	128052190	-	11849	protein_coding	monoglyceride lipase [Source:HGNC Symbol;Acc:HGNC:17038]	-	2.35	3.17	-0.376565	0.00723982	0.383695
ENSG00000230562	FAM133DP	2	157379724	157380414	-	691	processed_pseudogene	family with sequence similarity 133 member D, pseudogene [Source:HGNC Symbol;Acc:HGNC:44192]	-	1.08	2.36	-0.831535	0.00726392	0.383695
ENSG00000101412	E2F1	20	33675683	33686404	-	2503	protein_coding	E2F transcription factor 1 [Source:HGNC Symbol;Acc:HGNC:3113]	E2F	1.32	2.2	-0.619704	0.00737889	0.388331
ENSG00000259717	LINC00677	14	103120847	103123007	-	584	lincRNA	long intergenic non-protein coding RNA 677 [Source:HGNC Symbol;Acc:HGNC:20121]	-	13.16	8.25	0.632112	0.007404	0.388331
ENSG00000184731	FAM110C	2	38814	46870	-	3968	protein_coding	family with sequence similarity 110 member C [Source:HGNC Symbol;Acc:HGNC:33340]	-	0.28	0.67	-0.870971	0.00743968	0.388828
ENSG00000205822	TPTE2P6	13	24408157	24597676	+	1816	transcribed_unprocessed_pseudogene	transmembrane phosphoinositide 3-phosphatase and tensin homolog 2 pseudogene 6 [Source:HGNC Symbol;Acc:HGNC:42644]	-	0.34	0.05	0.950999	0.00746949	NA
ENSG00000197162	ZNF785	16	30573740	30585771	-	4952	protein_coding	zinc finger protein 785 [Source:HGNC Symbol;Acc:HGNC:26496]	zf-C2H2	0.49	0.26	0.758741	0.00748942	0.388846
ENSG00000074964	ARHGEF10L	1	17539835	17697874	+	7817	protein_coding	Rho guanine nucleotide exchange factor 10 like [Source:HGNC Symbol;Acc:HGNC:25540]	-	5.59	3.52	0.62771	0.00750378	0.388846
ENSG00000137628	DDX60	4	168216293	168318807	-	6750	protein_coding	DExD/H-box helicase 60 [Source:HGNC Symbol;Acc:HGNC:25942]	-	5.53	7.7	-0.41755	0.00753788	0.388846
ENSG00000105784	RUNDC3B	7	87627548	87832296	+	4710	protein_coding	RUN domain containing 3B [Source:HGNC Symbol;Acc:HGNC:30286]	-	0	0.08	-0.863712	0.0075382	NA
ENSG00000076067	RBMS2	12	56521929	56596196	+	8808	protein_coding	RNA binding motif single stranded interacting protein 2 [Source:HGNC Symbol;Acc:HGNC:9909]	-	1.93	1.26	0.595102	0.00754481	0.388846
ENSG00000169239	CA5B	X	15688830	15788409	+	8520	protein_coding	carbonic anhydrase 5B [Source:HGNC Symbol;Acc:HGNC:1378]	-	2.3	3.37	-0.479968	0.00760996	0.390846
ENSG00000125845	BMP2	20	6767664	6780280	+	3601	protein_coding	bone morphogenetic protein 2 [Source:HGNC Symbol;Acc:HGNC:1069]	-	0.29	0.08	0.972577	0.00770829	0.3938
ENSG00000243147	MRPL33	2	27771717	27988087	+	1539	protein_coding	mitochondrial ribosomal protein L33 [Source:HGNC Symbol;Acc:HGNC:14487]	-	11.5	8.73	0.41522	0.00773374	0.3938
ENSG00000138061	CYP1B1	2	38066973	38109902	-	6014	protein_coding	cytochrome P450 family 1 subfamily B member 1 [Source:HGNC Symbol;Acc:HGNC:2597]	-	9.13	5.81	0.61918	0.00774706	0.3938
ENSG00000122126	OCRL	X	129539849	129592561	+	6064	protein_coding	OCRL, inositol polyphosphate-5-phosphatase [Source:HGNC Symbol;Acc:HGNC:8108]	-	1.89	1.23	0.592821	0.00787594	0.398985
ENSG00000083457	ITGAE	17	3714628	3801243	-	6657	protein_coding	integrin subunit alpha E [Source:HGNC Symbol;Acc:HGNC:6147]	-	2.57	1.89	0.45612	0.00803255	0.405535
ENSG00000084731	KIF3C	2	25926596	25982749	-	6403	protein_coding	kinesin family member 3C [Source:HGNC Symbol;Acc:HGNC:6321]	-	2.09	3.08	-0.478218	0.00809569	0.407337
ENSG00000177946	CENPBD1	16	89969773	89972832	-	3060	protein_coding	CENPB DNA-binding domain containing 1 [Source:HGNC Symbol;Acc:HGNC:28272]	-	3.89	2.9	0.436949	0.00818916	0.410648
ENSG00000072501	SMC1A	X	53374149	53422728	-	10484	protein_coding	structural maintenance of chromosomes 1A [Source:HGNC Symbol;Acc:HGNC:11111]	-	10.56	13.94	-0.346162	0.00829412	0.414511
ENSG00000129757	CDKN1C	11	2883213	2885773	-	2478	protein_coding	cyclin dependent kinase inhibitor 1C [Source:HGNC Symbol;Acc:HGNC:1786]	-	5.18	8.88	-0.646858	0.00832265	0.414541
ENSG00000105501	SIGLEC5	19	51611927	51645545	-	2360	protein_coding	sialic acid binding Ig like lectin 5 [Source:HGNC Symbol;Acc:HGNC:10874]	-	1.05	1.91	-0.696576	0.00838887	0.416442
ENSG00000130052	STARD8	X	68647666	68725842	+	5558	protein_coding	StAR related lipid transfer domain containing 8 [Source:HGNC Symbol;Acc:HGNC:19161]	-	2.44	1.73	0.501336	0.0084432	0.417741
ENSG00000100075	SLC25A1	22	19175575	19178830	-	2096	protein_coding	solute carrier family 25 member 1 [Source:HGNC Symbol;Acc:HGNC:10979]	-	12.26	16.57	-0.379757	0.00853575	0.420917
ENSG00000100116	GCAT	22	37807905	37817176	+	2104	protein_coding	glycine C-acetyltransferase [Source:HGNC Symbol;Acc:HGNC:4188]	-	0.57	0.21	0.932335	0.00856535	0.420979
ENSG00000261654	AL360270.2	1	110936369	110942353	-	5985	sense_overlapping	novel transcript, sense overlapping C1orf103	-	0.02	0.1	-0.961145	0.0085979	NA
ENSG00000141736	ERBB2	17	39687914	39730426	+	10321	protein_coding	erb-b2 receptor tyrosine kinase 2 [Source:HGNC Symbol;Acc:HGNC:3430]	-	1.1	1.68	-0.518724	0.00859898	0.421236
ENSG00000185710	SMG1P4	16	21879338	21919156	-	6290	transcribed_unprocessed_pseudogene	SMG1 pseudogene 4 [Source:HGNC Symbol;Acc:HGNC:49861]	-	0.16	0.06	0.921336	0.00863723	0.421719
ENSG00000168758	SEMA4C	2	96859716	96870757	-	6157	protein_coding	semaphorin 4C [Source:HGNC Symbol;Acc:HGNC:10731]	-	4.59	6.92	-0.509182	0.00868033	0.422433
ENSG00000273819	ENPP7P7	11	67812557	67873367	-	1102	unprocessed_pseudogene	ectonucleotide pyrophosphatase/phosphodiesterase 7 pseudogene 7 [Source:HGNC Symbol;Acc:HGNC:48690]	-	0.16	0.64	-0.957144	0.00889885	NA
ENSG00000107104	KANK1	9	470291	746106	+	11908	protein_coding	KN motif and ankyrin repeat domains 1 [Source:HGNC Symbol;Acc:HGNC:19309]	-	0.42	0.73	-0.651166	0.00891547	0.432459
ENSG00000166685	COG1	17	73192632	73208507	+	5317	protein_coding	component of oligomeric golgi complex 1 [Source:HGNC Symbol;Acc:HGNC:6545]	-	3.45	4.61	-0.365014	0.00896991	0.433682
ENSG00000134780	DAGLA	11	61680433	61747001	+	5757	protein_coding	diacylglycerol lipase alpha [Source:HGNC Symbol;Acc:HGNC:1165]	-	1.49	1.08	0.476504	0.00899945	0.433697
ENSG00000226752	CUTALP	9	120824828	120854385	+	7224	transcribed_unitary_pseudogene	cutA divalent cation tolerance homolog-like, pseudogene [Source:HGNC Symbol;Acc:HGNC:27367]	-	5.25	2.3	0.873691	0.00913325	0.435979
ENSG00000215458	AATBC	21	43805758	43812567	-	4874	antisense	apoptosis associated transcript in bladder cancer [Source:HGNC Symbol;Acc:HGNC:51526]	-	5.54	3.74	0.54815	0.00914494	0.435979
ENSG00000127415	IDUA	4	986997	1004506	+	4000	protein_coding	iduronidase, alpha-L- [Source:HGNC Symbol;Acc:HGNC:5391]	-	6.42	5.07	0.365634	0.009147	0.435979
ENSG00000133246	PRAM1	19	8490056	8503112	-	3763	protein_coding	PML-RARA regulated adaptor molecule 1 [Source:HGNC Symbol;Acc:HGNC:30091]	-	67.02	43.85	0.586427	0.00916429	0.435979
ENSG00000198467	TPM2	9	35681992	35690121	-	3248	protein_coding	tropomyosin 2 [Source:HGNC Symbol;Acc:HGNC:12011]	-	2.99	2.18	0.463734	0.00919478	0.436032
ENSG00000237899	AL031289.1	1	40669089	40687588	-	471	lincRNA	novel transcript	-	3.5	6.44	-0.700069	0.009278	0.438577
ENSG00000254531	FLJ20021	4	101347780	101348883	+	790	lincRNA	uncharacterized LOC90024 [Source:NCBI gene;Acc:90024]	-	1.15	2.34	-0.772247	0.00938455	0.439411
ENSG00000225940	C5orf67	5	56511567	56606232	-	767	protein_coding	chromosome 5 open reading frame 67 [Source:HGNC Symbol;Acc:HGNC:51252]	-	2.37	4.57	-0.738768	0.00942174	0.439411
ENSG00000148735	PLEKHS1	10	113751454	113783429	+	5402	protein_coding	pleckstrin homology domain containing S1 [Source:HGNC Symbol;Acc:HGNC:26285]	-	0.04	0	0.795966	0.00942929	NA
ENSG00000211964	IGHV3-48	14	106537810	106538344	-	432	IG_V_gene	immunoglobulin heavy variable 3-48 [Source:HGNC Symbol;Acc:HGNC:5606]	-	3.22	8.53	-0.902546	0.00948218	0.439411
ENSG00000133812	SBF2	11	9778667	10294207	-	16767	protein_coding	SET binding factor 2 [Source:HGNC Symbol;Acc:HGNC:2135]	-	3.08	4.05	-0.343325	0.00949092	0.439411
ENSG00000250771	AC106865.1	4	153640168	153681180	+	3277	transcribed_unprocessed_pseudogene	toll like receptor 2 pseudogene [Source:NCBI gene;Acc:100419170]	-	0.72	0.33	0.841934	0.00953109	0.439411
ENSG00000105509	HAS1	19	51713112	51723994	-	2241	protein_coding	hyaluronan synthase 1 [Source:HGNC Symbol;Acc:HGNC:4818]	-	0.35	0.1	0.946268	0.0095471	0.439411
ENSG00000010327	STAB1	3	52495338	52524495	+	10588	protein_coding	stabilin 1 [Source:HGNC Symbol;Acc:HGNC:18628]	-	27.05	14.61	0.751818	0.00954835	0.439411
ENSG00000170385	SLC30A1	1	211571568	211578742	-	5474	protein_coding	solute carrier family 30 member 1 [Source:HGNC Symbol;Acc:HGNC:11012]	-	6.79	5.42	0.353846	0.00955577	0.439411
ENSG00000165752	STK32C	10	132207492	132331847	-	3543	protein_coding	serine/threonine kinase 32C [Source:HGNC Symbol;Acc:HGNC:21332]	-	4.93	3.65	0.44294	0.00956206	0.439411
ENSG00000197013	ZNF429	19	21496682	21556270	+	5054	protein_coding	zinc finger protein 429 [Source:HGNC Symbol;Acc:HGNC:20817]	zf-C2H2	3.89	6.63	-0.633049	0.00966129	0.442264
ENSG00000130202	NECTIN2	19	44846175	44889228	+	3747	protein_coding	nectin cell adhesion molecule 2 [Source:HGNC Symbol;Acc:HGNC:9707]	-	1.26	2.17	-0.647429	0.00970353	0.442264
ENSG00000166546	BEAN1	16	66427297	66493529	+	7379	protein_coding	brain expressed associated with NEDD4 1 [Source:HGNC Symbol;Acc:HGNC:24160]	-	1.16	0.57	0.797725	0.00971354	0.442264
ENSG00000211714	TRBV7-3	7	142384329	142384841	+	397	TR_V_gene	T cell receptor beta variable 7-3 [Source:HGNC Symbol;Acc:HGNC:12237]	-	3.39	6.27	-0.703876	0.00976143	0.443085
ENSG00000256206	AC018523.2	11	14493783	14520344	-	1221	protein_coding	novel transcript	-	0.33	0.05	0.903976	0.00982439	NA
ENSG00000197629	MPEG1	11	59208510	59212951	-	4442	protein_coding	macrophage expressed 1 [Source:HGNC Symbol;Acc:HGNC:29619]	-	155.5	115.65	0.442324	0.00988913	0.447513
ENSG00000123384	LRP1	12	57128493	57213351	+	20839	protein_coding	LDL receptor related protein 1 [Source:HGNC Symbol;Acc:HGNC:6692]	-	23.59	17.76	0.424526	0.0100582	0.453162
ENSG00000113758	DBN1	5	177456608	177474401	-	5119	protein_coding	drebrin 1 [Source:HGNC Symbol;Acc:HGNC:2695]	-	4.9	7.71	-0.545074	0.010075	0.453162
ENSG00000260496	AC009041.1	16	991151	1000926	-	1383	lincRNA	novel transcript	-	2.81	4.37	-0.541488	0.0101887	0.455281
ENSG00000111863	ADTRP	6	11712054	11807046	-	4150	protein_coding	androgen dependent TFPI regulating protein [Source:HGNC Symbol;Acc:HGNC:21214]	-	0.72	0.29	0.89866	0.0101947	0.455281
ENSG00000121064	SCPEP1	17	56978105	57006768	+	3853	protein_coding	serine carboxypeptidase 1 [Source:HGNC Symbol;Acc:HGNC:29507]	-	25.88	18.15	0.506241	0.0102507	0.455281
ENSG00000095383	TBC1D2	9	98198999	98255721	-	3681	protein_coding	TBC1 domain family member 2 [Source:HGNC Symbol;Acc:HGNC:18026]	-	13.55	10.21	0.427922	0.0102674	0.455281
ENSG00000170049	KCNAB3	17	7921859	7929803	-	4580	protein_coding	potassium voltage-gated channel subfamily A regulatory beta subunit 3 [Source:HGNC Symbol;Acc:HGNC:6230]	-	0.98	0.56	0.7129	0.0102755	0.455281
ENSG00000173950	XXYLT1	3	195068279	195271167	-	5409	protein_coding	xyloside xylosyltransferase 1 [Source:HGNC Symbol;Acc:HGNC:26639]	-	2.74	1.95	0.49055	0.0103673	0.457464
ENSG00000113369	ARRDC3	5	91368724	91383359	-	4934	protein_coding	arrestin domain containing 3 [Source:HGNC Symbol;Acc:HGNC:29263]	-	30.56	39.34	-0.312892	0.0104093	0.457464
ENSG00000168476	REEP4	8	22138020	22141951	-	2266	protein_coding	receptor accessory protein 4 [Source:HGNC Symbol;Acc:HGNC:26176]	-	16.89	12.59	0.435459	0.0104197	0.457464
ENSG00000146054	TRIM7	5	181193924	181205293	-	7338	protein_coding	tripartite motif containing 7 [Source:HGNC Symbol;Acc:HGNC:16278]	-	0.34	0.19	0.714	0.010448	0.457464
ENSG00000214063	TSPAN4	11	842808	867116	+	5841	protein_coding	tetraspanin 4 [Source:HGNC Symbol;Acc:HGNC:11859]	-	2.19	1.38	0.610031	0.0105411	0.46018
ENSG00000273748	AL592183.1	GL000219.1	54224	83311	-	372	protein_coding		-	114.43	91.01	0.357189	0.0106507	0.463601
ENSG00000125354	44080	X	119615724	119693370	-	6245	protein_coding	septin 6 [Source:HGNC Symbol;Acc:HGNC:15848]	-	31.33	41.97	-0.367951	0.0106867	0.463809
ENSG00000157216	SSBP3	1	54225432	54413479	-	5227	protein_coding	single stranded DNA binding protein 3 [Source:HGNC Symbol;Acc:HGNC:15674]	-	13.4	18.16	-0.380813	0.0107366	0.464352
ENSG00000169045	HNRNPH1	5	179614178	179634784	-	9480	protein_coding	heterogeneous nuclear ribonucleoprotein H1 [Source:HGNC Symbol;Acc:HGNC:5041]	-	63.34	52.91	0.292278	0.0107618	0.464352
ENSG00000187608	ISG15	1	1001138	1014540	+	941	protein_coding	ISG15 ubiquitin-like modifier [Source:HGNC Symbol;Acc:HGNC:4053]	-	37.32	51.48	-0.400168	0.0108162	0.465347
ENSG00000132669	RIN2	20	19757606	20002459	+	8273	protein_coding	Ras and Rab interactor 2 [Source:HGNC Symbol;Acc:HGNC:18750]	-	2.81	1.96	0.516557	0.0108818	0.466818
ENSG00000104879	CKM	19	45306414	45322977	-	1657	protein_coding	creatine kinase, M-type [Source:HGNC Symbol;Acc:HGNC:1994]	-	0.25	0.04	0.907087	0.0109317	NA
ENSG00000236682	AC068282.1	2	127389130	127400580	+	2690	lincRNA	novel transcript	-	0.8	1.53	-0.733136	0.0109632	0.467316
ENSG00000174469	CNTNAP2	7	146116002	148420998	+	16666	protein_coding	contactin associated protein like 2 [Source:HGNC Symbol;Acc:HGNC:13830]	-	0.3	0.67	-0.817922	0.0109742	0.467316
ENSG00000196372	ASB13	10	5638867	5666595	-	3003	protein_coding	ankyrin repeat and SOCS box containing 13 [Source:HGNC Symbol;Acc:HGNC:19765]	-	4.2	3.08	0.456769	0.0109879	0.467316
ENSG00000179163	FUCA1	1	23845077	23868294	-	2047	protein_coding	alpha-L-fucosidase 1 [Source:HGNC Symbol;Acc:HGNC:4006]	-	14.36	9.71	0.55277	0.0110203	0.467357
ENSG00000235169	SMIM1	1	3772761	3775982	+	981	protein_coding	small integral membrane protein 1 (Vel blood group) [Source:HGNC Symbol;Acc:HGNC:44204]	-	3.19	1.97	0.633551	0.0110643	0.46788
ENSG00000125492	BARHL1	9	132582185	132590266	+	2341	protein_coding	BarH like homeobox 1 [Source:HGNC Symbol;Acc:HGNC:953]	Homeobox	0.17	0.01	0.811864	0.011099	NA
ENSG00000163947	ARHGEF3	3	56727418	57079329	-	6594	protein_coding	Rho guanine nucleotide exchange factor 3 [Source:HGNC Symbol;Acc:HGNC:683]	-	14.68	20.27	-0.405316	0.0111257	0.46788
ENSG00000211793	TRAV9-2	14	21941128	21941657	+	394	TR_V_gene	T cell receptor alpha variable 9-2 [Source:HGNC Symbol;Acc:HGNC:12154]	-	7.28	12.89	-0.669858	0.0111272	0.46788
ENSG00000229358	DPY19L1P1	7	32580949	32761787	-	2594	unprocessed_pseudogene	DPY19L1 pseudogene 1 [Source:HGNC Symbol;Acc:HGNC:22395]	-	0.79	1.92	-0.850946	0.0112126	0.470137
ENSG00000109943	CRTAM	11	122838500	122872639	+	2675	protein_coding	cytotoxic and regulatory T cell molecule [Source:HGNC Symbol;Acc:HGNC:24313]	-	3.7	6.17	-0.613915	0.0112744	0.47123
ENSG00000105374	NKG7	19	51371606	51372715	-	935	protein_coding	natural killer cell granule protein 7 [Source:HGNC Symbol;Acc:HGNC:7830]	-	228.05	378.3	-0.613415	0.0113022	0.47123
ENSG00000105701	FKBP8	19	18531751	18544077	-	2902	protein_coding	FK506 binding protein 8 [Source:HGNC Symbol;Acc:HGNC:3724]	-	574.08	350.65	0.634894	0.0113745	0.472018
ENSG00000146700	SSC4D	7	76389334	76409695	-	2819	protein_coding	scavenger receptor cysteine rich family member with 4 domains [Source:HGNC Symbol;Acc:HGNC:14461]	-	0.2	0.05	0.925978	0.011382	NA
ENSG00000211666	IGLV2-14	22	22758700	22759218	+	402	IG_V_gene	immunoglobulin lambda variable 2-14 [Source:HGNC Symbol;Acc:HGNC:5888]	-	13.87	25.78	-0.69513	0.0113847	0.472018
ENSG00000185559	DLK1	14	100725705	100738224	+	5312	protein_coding	delta like non-canonical Notch ligand 1 [Source:HGNC Symbol;Acc:HGNC:2907]	-	0	0.07	-0.757102	0.0114204	NA
ENSG00000067836	ROGDI	16	4796968	4802950	-	3683	protein_coding	rogdi homolog [Source:HGNC Symbol;Acc:HGNC:29478]	-	1.78	1.13	0.61266	0.0114407	0.4722
ENSG00000184163	C1QTNF12	1	1242446	1246722	-	1794	protein_coding	C1q and TNF related 12 [Source:HGNC Symbol;Acc:HGNC:32308]	-	0.93	0.44	0.816993	0.0114527	0.4722
ENSG00000100346	CACNA1I	22	39570753	39689737	+	10792	protein_coding	calcium voltage-gated channel subunit alpha1 I [Source:HGNC Symbol;Acc:HGNC:1396]	-	0.92	1.37	-0.487758	0.0115121	0.473335
ENSG00000267528	AC008991.1	19	28883430	28953245	+	537	lincRNA	novel transcript	-	0.25	1.05	-0.922097	0.0115733	NA
ENSG00000175711	B3GNTL1	17	82942155	83051810	-	6891	protein_coding	UDP-GlcNAc:betaGal beta-1,3-N-acetylglucosaminyltransferase like 1 [Source:HGNC Symbol;Acc:HGNC:21727]	-	5.69	8.72	-0.521668	0.011588	0.473693
ENSG00000006534	ALDH3B1	11	68008578	68029282	+	6626	protein_coding	aldehyde dehydrogenase 3 family member B1 [Source:HGNC Symbol;Acc:HGNC:410]	-	4.41	3.27	0.440163	0.0116097	0.473693
ENSG00000223547	ZNF844	19	12064699	12081565	+	6620	protein_coding	zinc finger protein 844 [Source:HGNC Symbol;Acc:HGNC:25932]	zf-C2H2	1.34	1.95	-0.45848	0.0116165	0.473693
ENSG00000168477	TNXB	6	32041153	32115334	-	15909	protein_coding	tenascin XB [Source:HGNC Symbol;Acc:HGNC:11976]	-	0.21	0.11	0.761066	0.011651	0.473797
ENSG00000179921	GPBAR1	2	218259496	218263859	+	2692	protein_coding	G protein-coupled bile acid receptor 1 [Source:HGNC Symbol;Acc:HGNC:19680]	-	8.98	7.12	0.359193	0.0118643	0.481153
ENSG00000137310	TCF19	6	31158542	31167159	+	3538	protein_coding	transcription factor 19 [Source:HGNC Symbol;Acc:HGNC:11629]	Others	2.13	3.17	-0.48942	0.0121306	0.490613
ENSG00000010295	IFFO1	12	6538375	6556083	-	5203	protein_coding	intermediate filament family orphan 1 [Source:HGNC Symbol;Acc:HGNC:24970]	-	19.69	14.68	0.433879	0.0121856	0.491496
ENSG00000203999	LINC01270	20	50292720	50314922	+	3014	lincRNA	long intergenic non-protein coding RNA 1270 [Source:HGNC Symbol;Acc:HGNC:27658]	-	9.34	4.84	0.758452	0.0122411	0.492084
ENSG00000133687	TMTC1	12	29500840	29784759	-	14636	protein_coding	transmembrane and tetratricopeptide repeat containing 1 [Source:HGNC Symbol;Acc:HGNC:24099]	-	0.71	1.15	-0.577243	0.0122665	0.492084
ENSG00000170791	CHCHD7	8	56211686	56218798	+	5866	protein_coding	coiled-coil-helix-coiled-coil-helix domain containing 7 [Source:HGNC Symbol;Acc:HGNC:28314]	-	4.05	3.22	0.354782	0.0123142	0.492548
ENSG00000101096	NFATC2	20	51386957	51562831	-	8286	protein_coding	nuclear factor of activated T cells 2 [Source:HGNC Symbol;Acc:HGNC:7776]	RHD	11.05	15.29	-0.405181	0.012394	0.492548
ENSG00000226067	LINC00623	1	120913275	121009291	+	2075	lincRNA	long intergenic non-protein coding RNA 623 [Source:HGNC Symbol;Acc:HGNC:44252]	-	17.19	22.38	-0.329435	0.0124299	0.492548
ENSG00000007350	TKTL1	X	154295671	154330350	+	3650	protein_coding	transketolase like 1 [Source:HGNC Symbol;Acc:HGNC:11835]	-	0.97	1.8	-0.708096	0.0124414	0.492548
ENSG00000227159	DDX11L16	X	156025664	156027877	-	1306	unprocessed_pseudogene	DEAD/H-box helicase 11 like 16 [Source:HGNC Symbol;Acc:HGNC:37115]	-	0.37	0.94	-0.859948	0.0124439	0.492548
ENSG00000140836	ZFHX3	16	72782885	73891871	-	22594	protein_coding	zinc finger homeobox 3 [Source:HGNC Symbol;Acc:HGNC:777]	Homeobox	0.53	0.39	0.44301	0.0125701	0.496107
ENSG00000121316	PLBD1	12	14503661	14568349	-	2841	protein_coding	phospholipase B domain containing 1 [Source:HGNC Symbol;Acc:HGNC:26215]	-	70.9	48.9	0.524639	0.0126007	0.496107
ENSG00000276070	CCL4L2	17	36210924	36212878	+	1397	protein_coding	C-C motif chemokine ligand 4 like 2 [Source:HGNC Symbol;Acc:HGNC:24066]	-	5.33	8.8	-0.607406	0.0127058	0.497201
ENSG00000157335	CLEC18C	16	70173322	70187361	+	4894	protein_coding	C-type lectin domain family 18 member C [Source:HGNC Symbol;Acc:HGNC:28538]	-	0.1	0.35	-0.910899	0.0127212	0.497201
ENSG00000282826	FRG1CP	20	28580709	28602664	-	769	unprocessed_pseudogene	FSHD region gene 1 family member C, pseudogene [Source:HGNC Symbol;Acc:HGNC:51762]	-	23.87	15.16	0.599023	0.012729	0.497201
ENSG00000179241	LDLRAD3	11	35943981	36232136	+	4575	protein_coding	low density lipoprotein receptor class A domain containing 3 [Source:HGNC Symbol;Acc:HGNC:27046]	-	1.31	0.88	0.561972	0.012784	0.498041
ENSG00000233077	LINC01271	20	50310711	50321342	-	2250	lincRNA	long intergenic non-protein coding RNA 1271 [Source:HGNC Symbol;Acc:HGNC:50327]	-	0.49	0.21	0.852043	0.0128433	0.498113
ENSG00000183439	TRIM61	4	164954446	164977668	-	1582	protein_coding	tripartite motif containing 61 [Source:HGNC Symbol;Acc:HGNC:24339]	-	0.97	0.41	0.849103	0.012853	0.498113
ENSG00000196550	FAM72A	1	206186179	206204414	-	3783	protein_coding	family with sequence similarity 72 member A [Source:HGNC Symbol;Acc:HGNC:24044]	-	0.19	0.06	0.906856	0.0128787	NA
ENSG00000229981	LINC01435	10	107694973	108197849	-	6148	lincRNA	long intergenic non-protein coding RNA 1435 [Source:HGNC Symbol;Acc:HGNC:50753]	-	0.83	0.51	0.644919	0.0129136	0.498648
ENSG00000155366	RHOC	1	112701106	112707434	-	4028	protein_coding	ras homolog family member C [Source:HGNC Symbol;Acc:HGNC:669]	-	4.53	7.29	-0.573485	0.012934	0.498648
ENSG00000080007	DDX43	6	73394748	73417569	+	2807	protein_coding	DEAD-box helicase 43 [Source:HGNC Symbol;Acc:HGNC:18677]	-	0.49	0.15	0.905592	0.013121	0.503076
ENSG00000172366	MCRIP2	16	636817	648474	+	5034	protein_coding	MAPK regulated corepressor interacting protein 2 [Source:HGNC Symbol;Acc:HGNC:14142]	-	3.4	2.54	0.430232	0.0131356	0.503076
ENSG00000266970	AC061992.1	17	78360453	78373911	+	1188	lincRNA	uncharacterized LOC101928674 [Source:NCBI gene;Acc:101928674]	-	1.04	2.3	-0.805601	0.0131756	0.503076
ENSG00000158106	RHPN1	8	143368887	143384220	+	4172	protein_coding	rhophilin Rho GTPase binding protein 1 [Source:HGNC Symbol;Acc:HGNC:19973]	-	5.22	4	0.406617	0.0131967	0.503076
ENSG00000232434	AJM1	9	136844415	136848801	+	4387	protein_coding	apical junction component 1 homolog [Source:HGNC Symbol;Acc:HGNC:37284]	-	3.46	5.08	-0.476824	0.0132183	0.503076
ENSG00000156127	BATF	14	75522425	75547015	+	980	protein_coding	basic leucine zipper ATF-like transcription factor [Source:HGNC Symbol;Acc:HGNC:958]	TF_bZIP	15.05	20.69	-0.398626	0.013284	0.504281
ENSG00000176170	SPHK1	17	76376584	76387860	+	4416	protein_coding	sphingosine kinase 1 [Source:HGNC Symbol;Acc:HGNC:11240]	-	2.59	1.67	0.597448	0.0135335	0.511976
ENSG00000135144	DTX1	12	113056709	113098028	+	4387	protein_coding	deltex E3 ubiquitin ligase 1 [Source:HGNC Symbol;Acc:HGNC:3060]	-	4.05	3.12	0.397543	0.0135845	0.511976
ENSG00000111642	CHD4	12	6570082	6614524	-	12713	protein_coding	chromodomain helicase DNA binding protein 4 [Source:HGNC Symbol;Acc:HGNC:1919]	-	0.04	0.1	-0.821326	0.0135901	0.511976
ENSG00000186088	GSAP	7	77310751	77416400	-	9001	protein_coding	gamma-secretase activating protein [Source:HGNC Symbol;Acc:HGNC:28042]	-	3.61	2.87	0.359229	0.0136398	0.512546
ENSG00000129422	MTUS1	8	17643795	17800917	-	12010	protein_coding	microtubule associated scaffold protein 1 [Source:HGNC Symbol;Acc:HGNC:29789]	-	0.27	0.16	0.657069	0.0137348	0.514813
ENSG00000180596	HIST1H2BC	6	26114873	26123926	-	834	protein_coding	histone cluster 1 H2B family member c [Source:HGNC Symbol;Acc:HGNC:4757]	-	18.22	31.67	-0.634669	0.0138353	0.517274
ENSG00000183605	SFXN4	10	119140767	119165667	-	1868	protein_coding	sideroflexin 4 [Source:HGNC Symbol;Acc:HGNC:16088]	-	5.09	3.47	0.539431	0.0139631	0.52074
ENSG00000182901	RGS7	1	240775515	241357230	-	2575	protein_coding	regulator of G protein signaling 7 [Source:HGNC Symbol;Acc:HGNC:10003]	-	0.02	0.13	-0.858027	0.0139913	NA
ENSG00000185818	NAT8L	4	2059512	2069089	+	5871	protein_coding	N-acetyltransferase 8 like [Source:HGNC Symbol;Acc:HGNC:26742]	-	0.07	0.22	-0.885591	0.0140537	0.522804
ENSG00000104093	DMXL2	15	51447711	51622833	-	13807	protein_coding	Dmx like 2 [Source:HGNC Symbol;Acc:HGNC:2938]	-	4	2.8	0.507095	0.0143275	0.529904
ENSG00000188011	RTP5	2	241869600	241873823	+	2606	protein_coding	receptor transporter protein 5 (putative) [Source:HGNC Symbol;Acc:HGNC:26585]	-	0.3	0.63	-0.765628	0.0143523	0.529904
ENSG00000092820	EZR	6	158765741	158819412	-	3342	protein_coding	ezrin [Source:HGNC Symbol;Acc:HGNC:12691]	-	55.67	74.94	-0.37539	0.0143702	0.529904
ENSG00000132122	SPATA6	1	48295372	48472208	-	5939	protein_coding	spermatogenesis associated 6 [Source:HGNC Symbol;Acc:HGNC:18309]	-	1.95	0.99	0.772386	0.0143979	0.529904
ENSG00000218175	AC016739.1	2	176200908	176201252	-	345	processed_pseudogene	ribosomal protein, large, P1 (RPLP1) pseudogene	-	23.5	16.86	0.47718	0.014423	0.529904
ENSG00000100079	LGALS2	22	37570246	37582616	-	828	protein_coding	galectin 2 [Source:HGNC Symbol;Acc:HGNC:6562]	-	35.24	18.54	0.759273	0.014516	0.532004
ENSG00000187796	CARD9	9	136361903	136373681	-	6699	protein_coding	caspase recruitment domain family member 9 [Source:HGNC Symbol;Acc:HGNC:16391]	-	5.65	3.48	0.630548	0.0145829	0.533139
ENSG00000135736	CCDC102A	16	57512178	57536599	-	2582	protein_coding	coiled-coil domain containing 102A [Source:HGNC Symbol;Acc:HGNC:28097]	-	4.32	6.03	-0.412663	0.0146265	0.533418
ENSG00000072163	LIMS2	2	127638381	127681786	-	8487	protein_coding	LIM zinc finger domain containing 2 [Source:HGNC Symbol;Acc:HGNC:16084]	-	0.49	0.31	0.628284	0.0146947	0.534064
ENSG00000179542	SLITRK4	X	143622790	143635777	-	8914	protein_coding	SLIT and NTRK like family member 4 [Source:HGNC Symbol;Acc:HGNC:23502]	-	0.54	0.34	0.60994	0.0147403	0.534064
ENSG00000285210	AL136382.1	1	86288704	86320711	-	2885	lincRNA	novel transcript	-	0.27	0.09	0.884156	0.0147615	0.534064
ENSG00000176248	ANAPC2	9	137174784	137188549	-	5447	protein_coding	anaphase promoting complex subunit 2 [Source:HGNC Symbol;Acc:HGNC:19989]	-	14.96	12.47	0.295274	0.0147881	0.534064
ENSG00000215790	SLC35E2A	1	1724838	1745999	-	7713	protein_coding	solute carrier family 35 member E2A [Source:HGNC Symbol;Acc:HGNC:20863]	-	1.35	0.86	0.591271	0.0149855	0.539877
ENSG00000234232	AC243772.3	1	149676851	149747818	-	3340	transcribed_unprocessed_pseudogene	phosphodiesterase 4D interacting protein pseudogene [Source:NCBI gene;Acc:102723955]	-	0.49	0.93	-0.70072	0.0150406	0.540551
ENSG00000271882	AP001330.5	8	101208148	101208558	+	411	lincRNA	novel transcript	-	0	0.5	-0.720369	0.0150936	NA
ENSG00000233695	GAS6-AS1	13	113815630	113845744	+	7169	antisense	GAS6 antisense RNA 1 [Source:HGNC Symbol;Acc:HGNC:39826]	-	0.38	0.22	0.669891	0.0151274	0.542358
ENSG00000276747	PADI6	1	17372196	17401699	+	2396	protein_coding	peptidyl arginine deiminase 6 [Source:HGNC Symbol;Acc:HGNC:20449]	-	0.15	0.48	-0.88224	0.0152684	0.54509
ENSG00000186431	FCAR	19	54874248	54890472	+	2366	protein_coding	Fc fragment of IgA receptor [Source:HGNC Symbol;Acc:HGNC:3608]	-	15.72	9.85	0.620377	0.0152906	0.54509
ENSG00000239713	APOBEC3G	22	39077005	39087743	+	5437	protein_coding	apolipoprotein B mRNA editing enzyme catalytic subunit 3G [Source:HGNC Symbol;Acc:HGNC:17357]	-	12.16	16.04	-0.346029	0.0153285	0.54509
ENSG00000147813	NAPRT	8	143574785	143578649	-	3079	protein_coding	nicotinate phosphoribosyltransferase [Source:HGNC Symbol;Acc:HGNC:30450]	-	7.44	5.37	0.476535	0.0153505	0.54509
ENSG00000163870	TPRA1	3	127571266	127598267	-	5622	protein_coding	transmembrane protein adipocyte associated 1 [Source:HGNC Symbol;Acc:HGNC:30413]	-	4.98	3.88	0.382625	0.0154394	0.546938
ENSG00000242779	ZNF702P	19	52968251	53037898	-	4769	transcribed_processed_pseudogene	zinc finger protein 702, pseudogene [Source:HGNC Symbol;Acc:HGNC:25775]	-	0.01	0.08	-0.855281	0.0155274	NA
ENSG00000157227	MMP14	14	22836557	22849027	+	4464	protein_coding	matrix metallopeptidase 14 [Source:HGNC Symbol;Acc:HGNC:7160]	-	1.51	0.85	0.692865	0.0156311	0.552356
ENSG00000073861	TBX21	17	47733244	47746119	+	2614	protein_coding	T-box 21 [Source:HGNC Symbol;Acc:HGNC:11599]	T-box	30.4	45.48	-0.498586	0.0156902	0.552356
ENSG00000099985	OSM	22	30262829	30266840	-	2114	protein_coding	oncostatin M [Source:HGNC Symbol;Acc:HGNC:8506]	-	2	3.06	-0.517993	0.015704	0.552356
ENSG00000111664	GNB3	12	6839954	6847393	+	3437	protein_coding	G protein subunit beta 3 [Source:HGNC Symbol;Acc:HGNC:4400]	-	0.22	0.08	0.872368	0.0158136	0.55435
ENSG00000255422	AP002954.1	11	118700427	118750263	+	966	antisense	uncharacterized LOC105369519 [Source:NCBI gene;Acc:105369519]	-	5.24	3.51	0.550399	0.0158354	0.55435
ENSG00000170677	SOCS6	18	70288901	70330200	+	5984	protein_coding	suppressor of cytokine signaling 6 [Source:HGNC Symbol;Acc:HGNC:16833]	-	0.75	0.51	0.53282	0.0159418	0.556616
ENSG00000260563	AC132872.1	17	82293716	82294910	+	1195	lincRNA	novel transcript	-	6.91	4.92	0.490549	0.0159751	0.556616
ENSG00000241566	IGKV2D-24	2	90004797	90005629	+	390	IG_V_gene	immunoglobulin kappa variable 2D-24 (non-functional) [Source:HGNC Symbol;Acc:HGNC:5797]	-	0.12	1.04	-0.819292	0.0160404	NA
ENSG00000114455	HHLA2	3	108296490	108378285	+	3627	protein_coding	HERV-H LTR-associating 2 [Source:HGNC Symbol;Acc:HGNC:4905]	-	0.32	0.15	0.809823	0.0161761	0.561759
ENSG00000103168	TAF1C	16	84177847	84187070	-	5577	protein_coding	TATA-box binding protein associated factor, RNA polymerase I subunit C [Source:HGNC Symbol;Acc:HGNC:11534]	-	9.73	8.08	0.299541	0.0161984	0.561759
ENSG00000184811	TRARG1	17	1279663	1300987	+	3596	protein_coding	trafficking regulator of GLUT4 (SLC2A4) 1 [Source:HGNC Symbol;Acc:HGNC:29592]	-	0.01	0.12	-0.827723	0.0163651	NA
ENSG00000125864	BFSP1	20	17493905	17569220	-	3361	protein_coding	beaded filament structural protein 1 [Source:HGNC Symbol;Acc:HGNC:1040]	-	1.08	2.14	-0.730338	0.0163663	0.566258
ENSG00000128438	TBC1D27P	17	16922915	16934839	-	5250	transcribed_unprocessed_pseudogene	TBC1 domain family member 27, pseudogene [Source:HGNC Symbol;Acc:HGNC:28104]	-	1.57	0.97	0.615807	0.0165297	0.57058
ENSG00000173914	RBM4B	11	66664998	66677921	-	4325	protein_coding	RNA binding motif protein 4B [Source:HGNC Symbol;Acc:HGNC:28842]	-	1.95	2.76	-0.422939	0.0166354	0.572897
ENSG00000232869	TRBV29-1	7	142740206	142740894	+	402	TR_V_gene	T cell receptor beta variable 29-1 [Source:HGNC Symbol;Acc:HGNC:12210]	-	14.57	21.14	-0.458877	0.016748	0.574414
ENSG00000149554	CHEK1	11	125625136	125676255	+	6558	protein_coding	checkpoint kinase 1 [Source:HGNC Symbol;Acc:HGNC:1925]	-	0.18	0.34	-0.684453	0.0167568	0.574414
ENSG00000170801	HTRA3	4	8269765	8307111	+	3321	protein_coding	HtrA serine peptidase 3 [Source:HGNC Symbol;Acc:HGNC:30406]	-	0.08	0	0.763688	0.0168294	NA
ENSG00000211893	IGHG2	14	105639559	105644790	-	2737	IG_C_gene	immunoglobulin heavy constant gamma 2 (G2m marker) [Source:HGNC Symbol;Acc:HGNC:5526]	-	56.85	44.91	0.359347	0.0169443	0.579302
ENSG00000124104	SNX21	20	45833810	45843275	+	4066	protein_coding	sorting nexin family member 21 [Source:HGNC Symbol;Acc:HGNC:16154]	-	1.94	1.35	0.510648	0.0169856	0.579302
ENSG00000166428	PLD4	14	104924713	104937790	+	6977	protein_coding	phospholipase D family member 4 [Source:HGNC Symbol;Acc:HGNC:23792]	-	4.41	6.2	-0.421193	0.0170165	0.579302
ENSG00000167693	NXN	17	799313	979770	-	5880	protein_coding	nucleoredoxin [Source:HGNC Symbol;Acc:HGNC:18008]	-	0.09	0.22	-0.838644	0.0170968	0.580704
ENSG00000215548	FRG1JP	9	63832127	63859641	-	931	unprocessed_pseudogene	FSHD region gene 1 family member J, pseudogene [Source:HGNC Symbol;Acc:HGNC:51768]	-	1.19	0.39	0.868558	0.0171426	0.58093
ENSG00000102967	DHODH	16	72008588	72027664	+	6921	protein_coding	dihydroorotate dehydrogenase (quinone) [Source:HGNC Symbol;Acc:HGNC:2867]	-	2.43	1.93	0.356089	0.017277	0.583545
ENSG00000262877	AC110285.2	17	81388126	81390256	-	1565	lincRNA	novel transcript	-	1.95	1.21	0.618157	0.0172984	0.583545
ENSG00000196576	PLXNB2	22	50274979	50307627	-	7257	protein_coding	plexin B2 [Source:HGNC Symbol;Acc:HGNC:9104]	-	36.4	27.83	0.405726	0.0173887	0.585211
ENSG00000137094	DNAJB5	9	34989641	34998900	+	5891	protein_coding	DnaJ heat shock protein family (Hsp40) member B5 [Source:HGNC Symbol;Acc:HGNC:14887]	-	0.7	1.04	-0.479649	0.0174266	0.585211
ENSG00000281741	AC241377.3	1	120913151	120914238	-	1088	TEC	uncharacterized LOC100996720 [Source:NCBI gene;Acc:100996720]	-	0.48	1.12	-0.806275	0.0175246	0.587172
ENSG00000241294	IGKV2-24	2	89176328	89177160	-	390	IG_V_gene	immunoglobulin kappa variable 2-24 [Source:HGNC Symbol;Acc:HGNC:5781]	-	2.36	7.01	-0.85908	0.0176063	0.58858
ENSG00000157483	MYO1E	15	59132434	59372900	-	9106	protein_coding	myosin IE [Source:HGNC Symbol;Acc:HGNC:7599]	-	1.5	2.03	-0.37546	0.0177091	0.590689
ENSG00000248472	DDX11L9	15	101976558	101979093	-	1740	transcribed_unprocessed_pseudogene	DEAD/H-box helicase 11 like 9 [Source:HGNC Symbol;Acc:HGNC:37109]	-	0.2	0.51	-0.833028	0.0178651	0.594071
ENSG00000188229	TUBB4B	9	137241213	137243707	+	2111	protein_coding	tubulin beta 4B class IVb [Source:HGNC Symbol;Acc:HGNC:20771]	-	29.71	37.72	-0.293604	0.0179352	0.594071
ENSG00000185201	IFITM2	11	307631	315272	+	1543	protein_coding	interferon induced transmembrane protein 2 [Source:HGNC Symbol;Acc:HGNC:5413]	-	553.44	797.15	-0.444522	0.0179532	0.594071
ENSG00000204252	HLA-DOA	6	33004178	33009612	-	4012	protein_coding	major histocompatibility complex, class II, DO alpha [Source:HGNC Symbol;Acc:HGNC:4936]	-	8.8	11.57	-0.342606	0.0179706	0.594071
ENSG00000134215	VAV3	1	107571160	107965144	-	7271	protein_coding	vav guanine nucleotide exchange factor 3 [Source:HGNC Symbol;Acc:HGNC:12659]	-	6.06	8.3	-0.386812	0.018125	0.595609
ENSG00000213904	LIPE-AS1	19	42397128	42652355	+	4208	antisense	LIPE antisense RNA 1 [Source:HGNC Symbol;Acc:HGNC:48589]	-	0.32	0.58	-0.679171	0.0181268	0.595609
ENSG00000198483	ANKRD35	1	145866560	145885866	-	3363	protein_coding	ankyrin repeat domain 35 [Source:HGNC Symbol;Acc:HGNC:26323]	-	0.2	0.06	0.861691	0.0181603	NA
ENSG00000265888	DSCAS	18	31101588	31162789	+	553	antisense	DSC1/DSC2 antisense RNA [Source:HGNC Symbol;Acc:HGNC:51116]	-	0.72	1.79	-0.823211	0.0182609	0.595609
ENSG00000180822	PSMG4	6	3231403	3303373	+	10418	protein_coding	proteasome assembly chaperone 4 [Source:HGNC Symbol;Acc:HGNC:21108]	-	1.4	1.08	0.388392	0.0182813	0.595609
ENSG00000186193	SAPCD2	9	137062124	137070588	-	3848	protein_coding	suppressor APC domain containing 2 [Source:HGNC Symbol;Acc:HGNC:28055]	-	1.21	0.68	0.691353	0.0182915	0.595609
ENSG00000198792	TMEM184B	22	38219291	38273034	-	7080	protein_coding	transmembrane protein 184B [Source:HGNC Symbol;Acc:HGNC:1310]	-	9.83	12.77	-0.321415	0.0183258	0.595609
ENSG00000052126	PLEKHA5	12	19129752	19376400	+	12558	protein_coding	pleckstrin homology domain containing A5 [Source:HGNC Symbol;Acc:HGNC:30036]	-	0.34	0.56	-0.591606	0.0183398	0.595609
ENSG00000065600	TMEM206	1	212363931	212414901	-	2914	protein_coding	transmembrane protein 206 [Source:HGNC Symbol;Acc:HGNC:25593]	-	4.09	3.14	0.396266	0.0183729	0.595609
ENSG00000150540	HNMT	2	137964020	138016364	+	4756	protein_coding	histamine N-methyltransferase [Source:HGNC Symbol;Acc:HGNC:5028]	-	3.58	2.58	0.464785	0.0183783	0.595609
ENSG00000118620	ZNF430	19	21020620	21060050	+	6845	protein_coding	zinc finger protein 430 [Source:HGNC Symbol;Acc:HGNC:20808]	zf-C2H2	2.76	3.87	-0.42206	0.0186144	0.601946
ENSG00000279138	AP002847.1	8	104478539	104480783	-	2245	TEC	TEC	-	0	0.09	-0.68575	0.0186962	NA
ENSG00000146530	VWDE	7	12330885	12403941	-	6712	protein_coding	von Willebrand factor D and EGF domains [Source:HGNC Symbol;Acc:HGNC:21897]	-	0.02	0.13	-0.829798	0.0187388	0.604652
ENSG00000274602	PI4KAP1	22	18533646	18577968	-	4812	transcribed_unprocessed_pseudogene	phosphatidylinositol 4-kinase alpha pseudogene 1 [Source:HGNC Symbol;Acc:HGNC:33576]	-	10.72	8.88	0.304015	0.0188052	0.605479
ENSG00000230426	ERVMER61-1	1	187070700	187686622	+	10142	lincRNA	endogenous retrovirus group MER61 member 1 [Source:HGNC Symbol;Acc:HGNC:27919]	-	0.42	0.23	0.6925	0.0189139	0.607659
ENSG00000231770	TMEM44-AS1	3	194584011	194590260	+	1119	antisense	TMEM44 antisense RNA 1 [Source:HGNC Symbol;Acc:HGNC:44272]	-	1.53	3.01	-0.72176	0.0189999	0.609103
ENSG00000119411	BSPRY	9	113349541	113371233	+	2339	protein_coding	B-box and SPRY domain containing [Source:HGNC Symbol;Acc:HGNC:18232]	-	0.23	0.51	-0.780235	0.0192808	0.616776
ENSG00000106211	HSPB1	7	76302544	76304295	+	1634	protein_coding	heat shock protein family B (small) member 1 [Source:HGNC Symbol;Acc:HGNC:5246]	-	13.76	18.16	-0.345739	0.0193953	0.619105
ENSG00000007129	CEACAM21	19	41549518	41586844	+	1964	protein_coding	carcinoembryonic antigen related cell adhesion molecule 21 [Source:HGNC Symbol;Acc:HGNC:28834]	-	17.39	25.05	-0.457233	0.0194737	0.620274
ENSG00000234814	SVIL2P	10	30655489	30717266	+	3232	transcribed_unprocessed_pseudogene	supervillin family member 2, pseudogene [Source:HGNC Symbol;Acc:HGNC:44959]	-	0.73	1.21	-0.585023	0.0195398	0.621048
ENSG00000143162	CREG1	1	167529117	167553805	-	3286	protein_coding	cellular repressor of E1A stimulated genes 1 [Source:HGNC Symbol;Acc:HGNC:2351]	-	21.07	15.57	0.443743	0.0196307	0.622605
ENSG00000224184	MIR3681HG	2	11848622	12578348	+	3876	lincRNA	MIR3681 host gene [Source:HGNC Symbol;Acc:HGNC:52001]	-	0.87	1.7	-0.717377	0.0196849	0.622991
ENSG00000105464	GRIN2D	19	48394875	48444931	+	5093	protein_coding	glutamate ionotropic receptor NMDA type subunit 2D [Source:HGNC Symbol;Acc:HGNC:4588]	-	0.74	0.5	0.548235	0.0197291	0.623063
ENSG00000167634	NLRP7	19	54923509	54966312	-	3914	protein_coding	NLR family pyrin domain containing 7 [Source:HGNC Symbol;Acc:HGNC:22947]	-	0.37	0.74	-0.723682	0.0198127	0.623937
ENSG00000275713	HIST1H2BH	6	26251651	26253710	+	2060	protein_coding	histone cluster 1 H2B family member h [Source:HGNC Symbol;Acc:HGNC:4755]	-	0.87	2.09	-0.800055	0.0198409	0.623937
ENSG00000206047	DEFA1	8	6977649	6980080	-	486	protein_coding	defensin alpha 1 [Source:HGNC Symbol;Acc:HGNC:2761]	-	1.41	0.26	0.816534	0.0198987	NA
ENSG00000166598	HSP90B1	12	103930107	103953645	+	4695	protein_coding	heat shock protein 90 beta family member 1 [Source:HGNC Symbol;Acc:HGNC:12028]	-	53.44	44.32	0.299437	0.0200403	0.628856
ENSG00000249992	TMEM158	3	45224466	45226278	-	1813	protein_coding	transmembrane protein 158 (gene/pseudogene) [Source:HGNC Symbol;Acc:HGNC:30293]	-	2.32	1.6	0.51874	0.020082	0.628856
ENSG00000087074	PPP1R15A	19	48872392	48876057	+	3093	protein_coding	protein phosphatase 1 regulatory subunit 15A [Source:HGNC Symbol;Acc:HGNC:14375]	-	34.86	49.72	-0.431048	0.0203469	0.635808
ENSG00000249592	AC139887.2	4	762387	781849	-	1575	antisense	uncharacterized LOC100129917 [Source:NCBI gene;Acc:100129917]	-	13.46	10.59	0.370144	0.0204366	0.637269
ENSG00000156453	PCDH1	5	141853111	141879246	-	5903	protein_coding	protocadherin 1 [Source:HGNC Symbol;Acc:HGNC:8655]	-	0.52	1.34	-0.815824	0.0204813	0.637326
ENSG00000231826	LINC01819	2	43027853	43039547	-	2759	lincRNA	long intergenic non-protein coding RNA 1819 [Source:HGNC Symbol;Acc:HGNC:52624]	-	0.74	0.36	0.773028	0.0205646	0.637377
ENSG00000142627	EPHA2	1	16124337	16156087	-	4159	protein_coding	EPH receptor A2 [Source:HGNC Symbol;Acc:HGNC:3386]	-	0.12	0.34	-0.833945	0.0205688	0.637377
ENSG00000166165	CKB	14	103519659	103523111	-	2669	protein_coding	creatine kinase B [Source:HGNC Symbol;Acc:HGNC:1991]	-	1.38	2.56	-0.68672	0.0206244	0.637768
ENSG00000198216	CACNA1E	1	181317690	181808084	+	18271	protein_coding	calcium voltage-gated channel subunit alpha1 E [Source:HGNC Symbol;Acc:HGNC:1392]	-	0.59	0.96	-0.572726	0.0207304	0.639541
ENSG00000180537	RNF182	6	13924446	13980302	+	4090	protein_coding	ring finger protein 182 [Source:HGNC Symbol;Acc:HGNC:28522]	-	0.43	0.01	0.687588	0.020768	0.639541
ENSG00000130508	PXDN	2	1631887	1744852	-	11257	protein_coding	peroxidasin [Source:HGNC Symbol;Acc:HGNC:14966]	-	0.01	0.03	-0.8369	0.0208462	NA
ENSG00000242485	MRPL20	1	1401908	1407313	-	2788	protein_coding	mitochondrial ribosomal protein L20 [Source:HGNC Symbol;Acc:HGNC:14478]	-	14.31	11.67	0.324452	0.0209102	0.642588
ENSG00000197857	ZNF44	19	12224686	12294887	-	6061	protein_coding	zinc finger protein 44 [Source:HGNC Symbol;Acc:HGNC:13110]	zf-C2H2	5.81	7.42	-0.302356	0.020974	0.643043
ENSG00000112096	SOD2	6	159669057	159745186	-	16493	protein_coding	superoxide dismutase 2 [Source:HGNC Symbol;Acc:HGNC:11180]	-	0.84	1.23	-0.458571	0.0210117	0.643043
ENSG00000159674	SPON2	4	1166932	1208962	-	6013	protein_coding	spondin 2 [Source:HGNC Symbol;Acc:HGNC:11253]	-	13.76	18.59	-0.36962	0.0213802	0.652976
ENSG00000159374	M1AP	2	74557883	74648338	-	3000	protein_coding	meiosis 1 associated protein [Source:HGNC Symbol;Acc:HGNC:25183]	-	0.69	0.35	0.756279	0.021527	0.654725
ENSG00000256072	AC078889.1	12	66251745	66257434	-	523	antisense	novel transcript	-	0.78	0.08	0.75024	0.0215327	NA
ENSG00000232828	AC231533.1	X	48698963	48737163	-	925	antisense	novel transcript	-	0.89	0.37	0.811414	0.0215467	0.654725
ENSG00000187583	PLEKHN1	1	966497	975865	+	2833	protein_coding	pleckstrin homology domain containing N1 [Source:HGNC Symbol;Acc:HGNC:25284]	-	0.58	0.3	0.724596	0.0215698	0.654725
ENSG00000164638	SLC29A4	7	5274369	5306870	+	5811	protein_coding	solute carrier family 29 member 4 [Source:HGNC Symbol;Acc:HGNC:23097]	-	0.01	0.09	-0.812724	0.0217291	NA
ENSG00000006756	ARSD	X	2903970	2929351	-	7030	protein_coding	arylsulfatase D [Source:HGNC Symbol;Acc:HGNC:717]	-	3.1	4.13	-0.356227	0.0217984	0.659504
ENSG00000119042	SATB2	2	199269500	199471266	-	10958	protein_coding	SATB homeobox 2 [Source:HGNC Symbol;Acc:HGNC:21637]	CUT	0.07	0.16	-0.783048	0.0218161	0.659504
ENSG00000251387	AC008667.3	5	139772528	139775406	-	553	lincRNA	novel transcript	-	0.51	0.06	0.769905	0.0218491	NA
ENSG00000189013	KIR2DL4	19	54803535	54814517	+	1724	protein_coding	killer cell immunoglobulin like receptor, two Ig domains and long cytoplasmic tail 4 [Source:HGNC Symbol;Acc:HGNC:6332]	-	0.21	0.79	-0.837524	0.0219048	0.660839
ENSG00000162433	AK4	1	65147549	65232145	+	7578	protein_coding	adenylate kinase 4 [Source:HGNC Symbol;Acc:HGNC:363]	-	0.04	0.12	-0.831066	0.0220944	0.665208
ENSG00000007264	MATK	19	3777970	3802129	-	4141	protein_coding	megakaryocyte-associated tyrosine kinase [Source:HGNC Symbol;Acc:HGNC:6906]	-	14.01	22.72	-0.573988	0.0221799	0.666111
ENSG00000167992	VWCE	11	61258286	61295424	-	4874	protein_coding	von Willebrand factor C and EGF domains [Source:HGNC Symbol;Acc:HGNC:26487]	-	4.17	2.25	0.703328	0.0222142	0.666111
ENSG00000225873	C3orf86	3	44421127	44439946	-	1204	transcribed_unitary_pseudogene	chromosome 3 open reading frame 86 [Source:HGNC Symbol;Acc:HGNC:44570]	-	8.33	11.44	-0.393691	0.0223724	0.669503
ENSG00000118420	UBE3D	6	82892398	83065841	-	6394	protein_coding	ubiquitin protein ligase E3D [Source:HGNC Symbol;Acc:HGNC:21381]	-	0.66	0.45	0.530345	0.0224592	0.670747
ENSG00000134107	BHLHE40	3	4979116	4985323	+	3837	protein_coding	basic helix-loop-helix family member e40 [Source:HGNC Symbol;Acc:HGNC:1046]	bHLH	20.87	27.59	-0.350619	0.0225911	0.673331
ENSG00000269082	AC010328.3	19	52956041	52981654	-	553	processed_transcript	novel transcript	-	0	0.33	-0.653933	0.0229163	NA
ENSG00000049768	FOXP3	X	49250436	49264826	-	2647	protein_coding	forkhead box P3 [Source:HGNC Symbol;Acc:HGNC:6106]	Fork	1.56	2.32	-0.483992	0.023076	0.686405
ENSG00000104936	DMPK	19	45769717	45782552	-	5807	protein_coding	DM1 protein kinase [Source:HGNC Symbol;Acc:HGNC:2933]	-	1.01	1.59	-0.539239	0.0232074	0.688935
ENSG00000231671	LINC01307	1	101323337	101390303	+	1238	lincRNA	long intergenic non-protein coding RNA 1307 [Source:HGNC Symbol;Acc:HGNC:50494]	-	0.01	0.21	-0.708053	0.0234101	NA
ENSG00000244617	ASPRV1	2	69960089	69962265	-	2177	protein_coding	aspartic peptidase retroviral like 1 [Source:HGNC Symbol;Acc:HGNC:26321]	-	5.08	7.64	-0.489504	0.0234439	0.694565
ENSG00000170035	UBE2E3	2	180967248	181076585	+	2973	protein_coding	ubiquitin conjugating enzyme E2 E3 [Source:HGNC Symbol;Acc:HGNC:12479]	-	10.57	13.52	-0.302771	0.0235699	0.696907
ENSG00000141622	RNF165	18	46326809	46463140	+	11419	protein_coding	ring finger protein 165 [Source:HGNC Symbol;Acc:HGNC:31696]	-	0.33	0.55	-0.599348	0.0237662	0.7
ENSG00000277117	FP565260.3	21	5022493	5040666	+	3357	protein_coding	Homo sapiens ICOS ligand (LOC102723996), mRNA. [Source:RefSeq mRNA;Acc:NM_001363770]	-	0.25	0.92	-0.82349	0.0237688	0.7
ENSG00000255545	AP004608.1	11	134436473	134505661	+	8255	processed_transcript	uncharacterized LOC283177 [Source:NCBI gene;Acc:283177]	-	0.17	0.33	-0.675373	0.0238292	0.700388
ENSG00000181035	SLC25A42	19	19063999	19112888	+	4519	protein_coding	solute carrier family 25 member 42 [Source:HGNC Symbol;Acc:HGNC:28380]	-	6.54	8.64	-0.34418	0.0239577	0.700667
ENSG00000141258	SGSM2	17	2337498	2381058	+	9771	protein_coding	small G protein signaling modulator 2 [Source:HGNC Symbol;Acc:HGNC:29026]	-	7.85	6.57	0.288016	0.0239834	0.700667
ENSG00000211785	TRAV12-1	14	21841240	21841774	+	340	TR_V_gene	T cell receptor alpha variable 12-1 [Source:HGNC Symbol;Acc:HGNC:12105]	-	7.53	18.23	-0.796907	0.0240035	0.700667
ENSG00000267320	AC005580.1	19	28316705	28386204	-	1155	lincRNA	novel transcript	-	0	0.17	-0.645073	0.0240537	NA
ENSG00000166012	TAF1D	11	93729948	93784391	-	8420	protein_coding	TATA-box binding protein associated factor, RNA polymerase I subunit D [Source:HGNC Symbol;Acc:HGNC:28759]	-	5.97	4.88	0.322514	0.0240848	0.700667
ENSG00000092295	TGM1	14	24249114	24264432	-	3735	protein_coding	transglutaminase 1 [Source:HGNC Symbol;Acc:HGNC:11777]	-	1.33	0.85	0.585924	0.0241324	0.700667
ENSG00000171224	FAM241B	10	69630251	69633599	+	1349	protein_coding	family with sequence similarity 241 member B [Source:HGNC Symbol;Acc:HGNC:23519]	-	1.42	0.73	0.728298	0.0241473	0.700667
ENSG00000109667	SLC2A9	4	9771153	10054936	-	6614	protein_coding	solute carrier family 2 member 9 [Source:HGNC Symbol;Acc:HGNC:13446]	-	3.6	2.62	0.453117	0.0241691	0.700667
ENSG00000261556	SMG1P7	16	70219574	70246610	-	4433	transcribed_unprocessed_pseudogene	SMG1 pseudogene 7 [Source:HGNC Symbol;Acc:HGNC:49864]	-	2.05	1.49	0.462966	0.0242515	0.701478
ENSG00000171658	NMRAL2P	3	185959943	185980872	+	2628	transcribed_unprocessed_pseudogene	NmrA like redox sensor 2, pseudogene [Source:HGNC Symbol;Acc:HGNC:52332]	-	0.16	0.03	0.798844	0.0242721	NA
ENSG00000133612	AGAP3	7	151085831	151144436	+	11032	protein_coding	ArfGAP with GTPase domain, ankyrin repeat and PH domain 3 [Source:HGNC Symbol;Acc:HGNC:16923]	-	3.74	2.95	0.364725	0.0242916	0.701478
ENSG00000182809	CRIP2	14	105472962	105480170	+	4837	protein_coding	cysteine rich protein 2 [Source:HGNC Symbol;Acc:HGNC:2361]	-	2.95	4.46	-0.506339	0.0245305	0.703987
ENSG00000111275	ALDH2	12	111766887	111817529	+	9720	protein_coding	aldehyde dehydrogenase 2 family member [Source:HGNC Symbol;Acc:HGNC:404]	-	6.03	4.13	0.518624	0.0245426	0.703987
ENSG00000100024	UPB1	22	24494107	24528390	+	6793	protein_coding	beta-ureidopropionase 1 [Source:HGNC Symbol;Acc:HGNC:16297]	-	0.63	0.41	0.57372	0.0245487	0.703987
ENSG00000149531	FRG1BP	20	30377372	30399257	+	761	unprocessed_pseudogene	FSHD region gene 1 family member B, pseudogene [Source:HGNC Symbol;Acc:HGNC:15792]	-	18.74	12.69	0.524889	0.0245682	0.703987
ENSG00000280441	FP236383.1	21	8380665	8410645	+	2498	lincRNA	novel transcript	-	3.45	2.02	0.647997	0.0246683	0.704525
ENSG00000135116	HRK	12	116856144	116881441	-	6853	protein_coding	harakiri, BCL2 interacting protein [Source:HGNC Symbol;Acc:HGNC:5185]	-	0.44	1.01	-0.776317	0.0246819	0.704525
ENSG00000147119	CHST7	X	46573784	46598408	+	2289	protein_coding	carbohydrate sulfotransferase 7 [Source:HGNC Symbol;Acc:HGNC:13817]	-	15.82	10.8	0.525541	0.0247791	0.705759
ENSG00000005100	DHX33	17	5440912	5469060	-	5872	protein_coding	DEAH-box helicase 33 [Source:HGNC Symbol;Acc:HGNC:16718]	-	1.39	1.05	0.408301	0.0248202	0.705759
ENSG00000196187	TMEM63A	1	225845536	225882369	-	10339	protein_coding	transmembrane protein 63A [Source:HGNC Symbol;Acc:HGNC:29118]	-	17.04	14.33	0.284829	0.0249409	0.707835
ENSG00000213876	RPL7AP64	17	7140930	7141592	+	663	processed_pseudogene	ribosomal protein L7a pseudogene 64 [Source:HGNC Symbol;Acc:HGNC:35821]	-	11.78	7.04	0.633345	0.0250922	0.710771
ENSG00000269713	NBPF9	1	149054027	149103561	-	9046	protein_coding	NBPF member 9 [Source:HGNC Symbol;Acc:HGNC:31991]	-	2.15	1.74	0.329671	0.0253147	0.711904
ENSG00000091138	SLC26A3	7	107765467	107803225	-	3382	protein_coding	solute carrier family 26 member 3 [Source:HGNC Symbol;Acc:HGNC:3018]	-	0.11	0.02	0.790465	0.025384	NA
ENSG00000093010	COMT	22	19941607	19969975	+	5195	protein_coding	catechol-O-methyltransferase [Source:HGNC Symbol;Acc:HGNC:2228]	-	8.72	6.87	0.363139	0.0253886	0.711904
ENSG00000276791	AC092117.1	16	2777319	2780568	+	3250	lincRNA	novel transcript	-	0.92	0.59	0.591031	0.0253909	0.711904
ENSG00000078124	ACER3	11	76860867	77026797	+	8442	protein_coding	alkaline ceramidase 3 [Source:HGNC Symbol;Acc:HGNC:16066]	-	3.48	2.72	0.374149	0.0254151	0.711904
ENSG00000088833	NSFL1C	20	1442162	1473842	-	6531	protein_coding	NSFL1 cofactor [Source:HGNC Symbol;Acc:HGNC:15912]	-	15.44	12.43	0.339982	0.0254192	0.711904
ENSG00000225968	ELFN1	7	1688119	1747954	+	3845	protein_coding	extracellular leucine rich repeat and fibronectin type III domain containing 1 [Source:HGNC Symbol;Acc:HGNC:33154]	-	0	0.05	-0.637056	0.0254241	NA
ENSG00000125454	SLC25A19	17	75272981	75289510	-	3316	protein_coding	solute carrier family 25 member 19 [Source:HGNC Symbol;Acc:HGNC:14409]	-	2.22	1.58	0.48416	0.0254743	0.711904
ENSG00000205269	TMEM170B	6	11538278	11583524	+	8362	protein_coding	transmembrane protein 170B [Source:HGNC Symbol;Acc:HGNC:34244]	-	7.51	5.61	0.427496	0.0254942	0.711904
ENSG00000144824	PHLDB2	3	111732497	111976517	+	12309	protein_coding	pleckstrin homology like domain family B member 2 [Source:HGNC Symbol;Acc:HGNC:29573]	-	0.7	1.05	-0.489403	0.0255355	0.711904
ENSG00000164116	GUCY1A1	4	155666711	155732349	+	5766	protein_coding	guanylate cyclase 1 soluble subunit alpha 1 [Source:HGNC Symbol;Acc:HGNC:4685]	-	1.22	1.74	-0.431158	0.0256081	0.711904
ENSG00000119121	TRPM6	9	74722495	74888094	-	9193	protein_coding	transient receptor potential cation channel subfamily M member 6 [Source:HGNC Symbol;Acc:HGNC:17995]	-	3.59	4.59	-0.303754	0.0256542	0.711904
ENSG00000196376	SLC35F1	6	117907526	118317676	+	4855	protein_coding	solute carrier family 35 member F1 [Source:HGNC Symbol;Acc:HGNC:21483]	-	0.06	0.01	0.774892	0.0257189	NA
ENSG00000167081	PBX3	9	125747345	125967377	+	4529	protein_coding	PBX homeobox 3 [Source:HGNC Symbol;Acc:HGNC:8634]	Homeobox	4.52	3.67	0.326226	0.025828	0.711904
ENSG00000007944	MYLIP	6	16129125	16148248	+	3033	protein_coding	myosin regulatory light chain interacting protein [Source:HGNC Symbol;Acc:HGNC:21155]	-	27.75	34.5	-0.265889	0.0258351	0.711904
ENSG00000263528	IKBKE	1	206470476	206496889	+	3791	protein_coding	inhibitor of nuclear factor kappa B kinase subunit epsilon [Source:HGNC Symbol;Acc:HGNC:14552]	-	8.77	6.78	0.391939	0.0258356	0.711904
ENSG00000242770	AC092892.1	3	112802478	112812819	+	770	processed_transcript	novel transcript	-	0.06	0.38	-0.768543	0.0258475	NA
ENSG00000242474	AC093627.5	7	135853	149466	-	1766	lincRNA	novel transcript	-	1.97	1.25	0.586024	0.0258882	0.711904
ENSG00000273117	AC144652.1	7	155295918	155297541	-	1624	lincRNA	novel transcript	-	0.98	1.67	-0.608036	0.0259364	0.711904
ENSG00000198468	FLVCR1-DT	1	212852108	212858088	-	3094	lincRNA	FLVCR1 divergent transcript [Source:HGNC Symbol;Acc:HGNC:39077]	-	2.09	1.49	0.477642	0.025963	0.711904
ENSG00000283977	AC084337.2	11	6481485	6508978	+	884	protein_coding	novel transcript	-	15.2	11.82	0.380915	0.0259649	0.711904
ENSG00000188092	GPR89B	1	147928393	147993521	+	5143	protein_coding	G protein-coupled receptor 89B [Source:HGNC Symbol;Acc:HGNC:13840]	-	2.38	1.68	0.47964	0.0260401	0.711904
ENSG00000121335	PRB2	12	11391540	11501041	-	1793	protein_coding	proline rich protein BstNI subfamily 2 [Source:HGNC Symbol;Acc:HGNC:9338]	-	0.1	0	0.637794	0.0260418	NA
ENSG00000228063	LYPLAL1-DT	1	219086602	219173961	-	724	antisense	LYPLAL1 divergent transcript [Source:HGNC Symbol;Acc:HGNC:50560]	-	1.27	2.58	-0.716174	0.0260435	0.711904
ENSG00000277957	SENP3-EIF4A1	17	7563287	7578715	+	3519	protein_coding	SENP3-EIF4A1 readthrough (NMD candidate) [Source:HGNC Symbol;Acc:HGNC:49182]	-	0.11	0.02	0.795722	0.0260738	NA
ENSG00000125633	CCDC93	2	117915478	118014133	-	8065	protein_coding	coiled-coil domain containing 93 [Source:HGNC Symbol;Acc:HGNC:25611]	-	2.36	1.81	0.395202	0.0261918	0.713027
ENSG00000162994	CLHC1	2	55174791	55232563	-	4398	protein_coding	clathrin heavy chain linker domain containing 1 [Source:HGNC Symbol;Acc:HGNC:26453]	-	1.36	0.87	0.58518	0.0262228	0.713027
ENSG00000244257	PKD1P1	16	16310341	16334190	+	6805	unprocessed_pseudogene	polycystin 1, transient receptor potential channel interacting pseudogene 1 [Source:HGNC Symbol;Acc:HGNC:30065]	-	0.03	0.22	-0.757132	0.0262287	0.713027
ENSG00000268889	AC008750.7	19	51394488	51403650	+	559	lincRNA	novel transcript	-	0.35	1.35	-0.805664	0.0262608	NA
ENSG00000183723	CMTM4	16	66614750	66696707	-	8117	protein_coding	CKLF like MARVEL transmembrane domain containing 4 [Source:HGNC Symbol;Acc:HGNC:19175]	-	1.28	0.83	0.576538	0.0263106	0.713946
ENSG00000104974	LILRA1	19	54593582	54602090	+	3587	protein_coding	leukocyte immunoglobulin like receptor A1 [Source:HGNC Symbol;Acc:HGNC:6602]	-	52.92	40.4	0.407657	0.0264712	0.714789
ENSG00000246982	Z84485.1	6	36146698	36197205	-	1463	antisense	novel transcript, antisense to BRPF3	-	2.91	2.01	0.50829	0.0264895	0.714789
ENSG00000155893	PXYLP1	3	141228726	141367753	+	13325	protein_coding	2-phosphoxylose phosphatase 1 [Source:HGNC Symbol;Acc:HGNC:26303]	-	0.27	0.13	0.75666	0.0264906	0.714789
ENSG00000158717	RNF166	16	88696495	88706421	-	4394	protein_coding	ring finger protein 166 [Source:HGNC Symbol;Acc:HGNC:28856]	-	78.3	60	0.398235	0.0265343	0.714789
ENSG00000186732	MPPED1	22	43411196	43507848	+	5821	protein_coding	metallophosphoesterase domain containing 1 [Source:HGNC Symbol;Acc:HGNC:1306]	-	0.03	0	0.633887	0.026585	NA
ENSG00000179593	ALOX15B	17	8039017	8049134	+	3028	protein_coding	arachidonate 15-lipoxygenase, type B [Source:HGNC Symbol;Acc:HGNC:434]	-	0.51	0.14	0.805361	0.0266706	0.717158
ENSG00000154447	SH3RF1	4	169094256	169271105	-	5624	protein_coding	SH3 domain containing ring finger 1 [Source:HGNC Symbol;Acc:HGNC:17650]	-	0.55	0.85	-0.517694	0.0268701	0.721216
ENSG00000105750	ZNF85	19	20923222	20950697	+	4668	protein_coding	zinc finger protein 85 [Source:HGNC Symbol;Acc:HGNC:13160]	zf-C2H2	0.58	1.08	-0.66423	0.0269384	0.721285
ENSG00000273749	CYFIP1	15	22867052	22981063	-	10414	protein_coding	cytoplasmic FMR1 interacting protein 1 [Source:HGNC Symbol;Acc:HGNC:13759]	-	4.32	3.26	0.412421	0.0270034	0.721285
ENSG00000247317	LY6E-DT	8	142981738	143018437	-	3853	lincRNA	LY6E divergent transcript [Source:HGNC Symbol;Acc:HGNC:53728]	-	0.23	0.1	0.79	0.0270261	0.721285
ENSG00000120802	TMPO	12	98515512	98550379	+	8593	protein_coding	thymopoietin [Source:HGNC Symbol;Acc:HGNC:11875]	-	11.27	9.53	0.275504	0.0271416	0.721285
ENSG00000178623	GPR35	2	240605431	240631259	+	5089	protein_coding	G protein-coupled receptor 35 [Source:HGNC Symbol;Acc:HGNC:4492]	-	3.23	2.48	0.394518	0.0271877	0.721285
ENSG00000105866	SP4	7	21428034	21514822	+	6234	protein_coding	Sp4 transcription factor [Source:HGNC Symbol;Acc:HGNC:11209]	zf-C2H2	4.42	6.3	-0.436691	0.0272267	0.721285
ENSG00000249917	LINC00536	8	115950511	116325059	-	2692	lincRNA	long intergenic non-protein coding RNA 536 [Source:HGNC Symbol;Acc:HGNC:43645]	-	0.06	0	0.630795	0.0272358	NA
ENSG00000180739	S1PR5	19	10512742	10517931	-	2806	protein_coding	sphingosine-1-phosphate receptor 5 [Source:HGNC Symbol;Acc:HGNC:14299]	-	21.92	33.91	-0.522319	0.0273056	0.721285
ENSG00000186891	TNFRSF18	1	1203508	1206691	-	1370	protein_coding	TNF receptor superfamily member 18 [Source:HGNC Symbol;Acc:HGNC:11914]	-	4.08	2.88	0.484935	0.0273419	0.721285
ENSG00000229628	AC073115.1	7	45990905	46000898	+	532	lincRNA	novel transcript	-	1.78	3.33	-0.668661	0.0273876	0.721285
ENSG00000142892	PIGK	1	77088990	77219430	-	5513	protein_coding	phosphatidylinositol glycan anchor biosynthesis class K [Source:HGNC Symbol;Acc:HGNC:8965]	-	3.41	4.46	-0.334793	0.0274162	0.721285
ENSG00000234323	LINC01505	9	105993310	106740875	+	10944	lincRNA	long intergenic non-protein coding RNA 1505 [Source:HGNC Symbol;Acc:HGNC:51186]	-	0.04	0.1	-0.772338	0.0274734	0.721285
ENSG00000170949	ZNF160	19	53066606	53103436	-	8511	protein_coding	zinc finger protein 160 [Source:HGNC Symbol;Acc:HGNC:12948]	zf-C2H2	4.47	5.63	-0.281606	0.0274872	0.721285
ENSG00000162129	CLPB	11	72285495	72434680	-	12428	protein_coding	ClpB homolog, mitochondrial AAA ATPase chaperonin [Source:HGNC Symbol;Acc:HGNC:30664]	-	0.79	0.59	0.422428	0.0275156	0.721285
ENSG00000078304	PPP2R5C	14	101761798	101927989	+	14289	protein_coding	protein phosphatase 2 regulatory subunit B'gamma [Source:HGNC Symbol;Acc:HGNC:9311]	-	13.52	16.81	-0.265725	0.0275571	0.721285
ENSG00000242029	AC078980.1	3	109648107	109810861	+	262	lincRNA	novel transcript	-	0	0.77	-0.621961	0.0275818	NA
ENSG00000101665	SMAD7	18	48919853	48952052	-	5033	protein_coding	SMAD family member 7 [Source:HGNC Symbol;Acc:HGNC:6773]	MH1	5.45	7.25	-0.353752	0.0276286	0.721285
ENSG00000182326	C1S	12	6988259	7071032	+	6462	protein_coding	complement C1s [Source:HGNC Symbol;Acc:HGNC:1247]	-	0.24	0.13	0.693725	0.0276501	0.721285
ENSG00000144827	ABHD10	3	111979010	111993363	+	3021	protein_coding	abhydrolase domain containing 10 [Source:HGNC Symbol;Acc:HGNC:25656]	-	8.49	6.78	0.350833	0.0278066	0.722146
ENSG00000162714	ZNF496	1	247297412	247331846	-	10531	protein_coding	zinc finger protein 496 [Source:HGNC Symbol;Acc:HGNC:23713]	zf-C2H2	2.18	1.64	0.416766	0.0278225	0.722146
ENSG00000180773	SLC36A4	11	93144171	93197964	-	9685	protein_coding	solute carrier family 36 member 4 [Source:HGNC Symbol;Acc:HGNC:19660]	-	2.08	1.62	0.380078	0.0278676	0.722146
ENSG00000171115	GIMAP8	7	150450630	150479392	+	4184	protein_coding	GTPase, IMAP family member 8 [Source:HGNC Symbol;Acc:HGNC:21792]	-	30.36	25.04	0.305337	0.0278778	0.722146
ENSG00000255439	AC135050.2	16	31083439	31094956	-	2716	protein_coding	novel protein, VKORC1 and PRSS53 readthrough	-	0.58	0.31	0.705334	0.0279683	0.723228
ENSG00000225231	LINC02470	12	9936579	9943495	-	979	lincRNA	long intergenic non-protein coding RNA 2470 [Source:HGNC Symbol;Acc:HGNC:53409]	-	0.31	0.05	0.75578	0.0279737	NA
ENSG00000143753	DEGS1	1	224175756	224193441	+	2515	protein_coding	delta 4-desaturase, sphingolipid 1 [Source:HGNC Symbol;Acc:HGNC:13709]	-	24.31	30.53	-0.277812	0.0280751	0.724727
ENSG00000176903	PNMA1	14	73711783	73714372	-	2590	protein_coding	PNMA family member 1 [Source:HGNC Symbol;Acc:HGNC:9158]	-	12.34	17.66	-0.437403	0.0282322	0.726789
ENSG00000158055	GRHL3	1	24319322	24364482	+	3940	protein_coding	grainyhead like transcription factor 3 [Source:HGNC Symbol;Acc:HGNC:25839]	CP2	0.08	0.01	0.756616	0.0282375	NA
ENSG00000166289	PLEKHF1	19	29665056	29675457	+	2681	protein_coding	pleckstrin homology and FYVE domain containing 1 [Source:HGNC Symbol;Acc:HGNC:20764]	-	8.23	12.08	-0.472967	0.0283256	0.726789
ENSG00000167363	FN3K	17	82735575	82751197	+	3872	protein_coding	fructosamine 3 kinase [Source:HGNC Symbol;Acc:HGNC:24822]	-	0.76	1.3	-0.604935	0.0283498	0.726789
ENSG00000173531	MST1	3	49683947	49689501	-	5084	protein_coding	macrophage stimulating 1 [Source:HGNC Symbol;Acc:HGNC:7380]	-	0.62	0.42	0.536595	0.0283508	0.726789
ENSG00000005206	SPPL2B	19	2328615	2354806	+	7130	protein_coding	signal peptide peptidase like 2B [Source:HGNC Symbol;Acc:HGNC:30627]	-	7.35	5.88	0.347562	0.0284322	0.727618
ENSG00000185324	CDK10	16	89680737	89696364	+	6791	protein_coding	cyclin dependent kinase 10 [Source:HGNC Symbol;Acc:HGNC:1770]	-	9.02	7	0.380857	0.0286492	0.731909
ENSG00000186522	44084	2	109542982	109614206	-	4131	protein_coding	septin 10 [Source:HGNC Symbol;Acc:HGNC:14349]	-	0.86	0.58	0.527531	0.0289664	0.738616
ENSG00000104972	LILRB1	19	54617158	54637528	+	5008	protein_coding	leukocyte immunoglobulin like receptor B1 [Source:HGNC Symbol;Acc:HGNC:6605]	-	14.41	11.75	0.318698	0.0290437	0.738616
ENSG00000136830	FAM129B	9	127505339	127578989	-	4629	protein_coding	family with sequence similarity 129 member B [Source:HGNC Symbol;Acc:HGNC:25282]	-	12.65	9.07	0.473452	0.029061	0.738616
ENSG00000155254	MARVELD1	10	97713173	97718152	+	3379	protein_coding	MARVEL domain containing 1 [Source:HGNC Symbol;Acc:HGNC:28674]	-	4.24	2.99	0.483738	0.0292373	0.740906
ENSG00000003249	DBNDD1	16	90004865	90020128	-	4791	protein_coding	dysbindin domain containing 1 [Source:HGNC Symbol;Acc:HGNC:28455]	-	1.85	1.09	0.63757	0.0293418	0.740906
ENSG00000086619	ERO1B	1	236215555	236281985	-	5361	protein_coding	endoplasmic reticulum oxidoreductase 1 beta [Source:HGNC Symbol;Acc:HGNC:14355]	-	2.58	2.02	0.370446	0.0293699	0.740906
ENSG00000114841	DNAH1	3	52316319	52400491	+	13872	protein_coding	dynein axonemal heavy chain 1 [Source:HGNC Symbol;Acc:HGNC:2940]	-	6.45	5.51	0.260843	0.0293931	0.740906
ENSG00000124103	FAM209A	20	56517187	56526142	+	1137	protein_coding	family with sequence similarity 209 member A [Source:HGNC Symbol;Acc:HGNC:16100]	-	0.32	0.08	0.783946	0.0294543	NA
ENSG00000237693	IRGM	5	150846523	150900736	+	2271	protein_coding	immunity related GTPase M [Source:HGNC Symbol;Acc:HGNC:29597]	-	0.37	0.72	-0.683117	0.0294637	0.740906
ENSG00000142185	TRPM2	21	44350163	44443081	+	6705	protein_coding	transient receptor potential cation channel subfamily M member 2 [Source:HGNC Symbol;Acc:HGNC:12339]	-	3.36	2.36	0.493604	0.0294775	0.740906
ENSG00000109920	FNBP4	11	47716517	47767443	-	7596	protein_coding	formin binding protein 4 [Source:HGNC Symbol;Acc:HGNC:19752]	-	17.63	15.14	0.254039	0.0295424	0.740906
ENSG00000225698	IGHV3-72	14	106790691	106791233	-	440	IG_V_gene	immunoglobulin heavy variable 3-72 [Source:HGNC Symbol;Acc:HGNC:5622]	-	5.43	2.86	0.709422	0.0295504	0.740906
ENSG00000116285	ERRFI1	1	8004404	8026308	-	4186	protein_coding	ERBB receptor feedback inhibitor 1 [Source:HGNC Symbol;Acc:HGNC:18185]	-	0.41	0.7	-0.594765	0.0296313	0.741377
ENSG00000170743	SYT9	11	7238778	7469042	+	4727	protein_coding	synaptotagmin 9 [Source:HGNC Symbol;Acc:HGNC:19265]	-	0.16	0.05	0.795437	0.0297077	0.741377
ENSG00000256069	A2MP1	12	9228533	9275817	-	4657	transcribed_unprocessed_pseudogene	alpha-2-macroglobulin pseudogene 1 [Source:HGNC Symbol;Acc:HGNC:8]	-	0.93	1.48	-0.544206	0.0297292	0.741377
ENSG00000170275	CRTAP	3	33113979	33147773	+	6695	protein_coding	cartilage associated protein [Source:HGNC Symbol;Acc:HGNC:2379]	-	13.51	11.21	0.297433	0.029769	0.741377
ENSG00000013375	PGM3	6	83161150	83193936	-	7335	protein_coding	phosphoglucomutase 3 [Source:HGNC Symbol;Acc:HGNC:8907]	-	0.91	0.65	0.466835	0.0299281	0.743741
ENSG00000214826	DDX12P	12	9418673	9448229	-	2947	unprocessed_pseudogene	DEAD/H-box helicase 12, pseudogene [Source:HGNC Symbol;Acc:HGNC:2737]	-	2.84	3.95	-0.409436	0.0299641	0.743741
ENSG00000213420	GPC2	7	100169606	100177372	-	3828	protein_coding	glypican 2 [Source:HGNC Symbol;Acc:HGNC:4450]	-	1.75	1.29	0.443938	0.0300314	0.744167
ENSG00000101197	BIRC7	20	63235883	63240507	+	1562	protein_coding	baculoviral IAP repeat containing 7 [Source:HGNC Symbol;Acc:HGNC:13702]	-	0.02	0.21	-0.68899	0.0300861	NA
ENSG00000241489	AC244197.3	X	149482543	149533935	-	3311	protein_coding	novel transcript	-	0.7	0.42	0.623468	0.0302784	0.748876
ENSG00000211804	TRDV1	14	22096032	22096619	+	365	TR_V_gene	T cell receptor delta variable 1 [Source:HGNC Symbol;Acc:HGNC:12262]	-	5.4	11.32	-0.729453	0.0303856	0.748876
ENSG00000105327	BBC3	19	47220822	47232766	-	3180	protein_coding	BCL2 binding component 3 [Source:HGNC Symbol;Acc:HGNC:17868]	-	13.21	18.66	-0.414873	0.0303946	0.748876
ENSG00000091490	SEL1L3	4	25747427	25863760	-	7489	protein_coding	SEL1L family member 3 [Source:HGNC Symbol;Acc:HGNC:29108]	-	10.47	13.78	-0.343506	0.0304445	0.748876
ENSG00000235820	AL109935.1	20	5533628	5535889	+	473	antisense	novel transcript	-	0.33	1.08	-0.791379	0.0304527	NA
ENSG00000080839	RBL1	20	36996349	37095995	-	5954	protein_coding	RB transcriptional corepressor like 1 [Source:HGNC Symbol;Acc:HGNC:9893]	-	2.28	3.01	-0.346955	0.0304737	0.748876
ENSG00000227999	MTND5P1	21	44473723	44475097	-	1375	processed_pseudogene	MT-ND5 pseudogene 1 [Source:HGNC Symbol;Acc:HGNC:39644]	-	0.02	0.17	-0.720585	0.0305037	NA
ENSG00000007402	CACNA2D2	3	50362799	50504244	-	6322	protein_coding	calcium voltage-gated channel auxiliary subunit alpha2delta 2 [Source:HGNC Symbol;Acc:HGNC:1400]	-	1.25	1.85	-0.476543	0.030558	0.749706
ENSG00000211935	IGHV1-3	14	106005095	106005574	-	395	IG_V_gene	immunoglobulin heavy variable 1-3 [Source:HGNC Symbol;Acc:HGNC:5552]	-	15.56	32.16	-0.724538	0.030645	0.750601
ENSG00000167858	TEKT1	17	6789133	6831761	-	3847	protein_coding	tektin 1 [Source:HGNC Symbol;Acc:HGNC:15534]	-	0.04	0	0.610991	0.0306767	NA
ENSG00000229308	AC010737.1	Y	4036497	4100320	+	559	lincRNA	novel transcript	-	0.3	0	0.610991	0.0306767	NA
ENSG00000251603	AC092611.2	4	151667224	151670502	+	304	antisense	novel transcript	-	0.84	2.25	-0.781242	0.030748	NA
ENSG00000176155	CCDC57	17	82101460	82212830	-	12397	protein_coding	coiled-coil domain containing 57 [Source:HGNC Symbol;Acc:HGNC:27564]	-	3.62	3.03	0.288463	0.0307528	0.752
ENSG00000234200	AC243591.1	X	153028785	153030148	+	1364	unprocessed_pseudogene	putative paraneoplastic antigen-like protein 6B-like protein LOC649238 pseudogene	-	0	0.12	-0.604518	0.0308868	NA
ENSG00000229672	AL450322.2	10	3751067	3763226	+	759	antisense	novel transcript	-	0	0.22	-0.604518	0.0308868	NA
ENSG00000234771	SLC25A25-AS1	9	128108581	128118693	-	6391	antisense	SLC25A25 antisense RNA 1 [Source:HGNC Symbol;Acc:HGNC:27844]	-	2.89	2.29	0.356897	0.0309173	0.754494
ENSG00000180509	KCNE1	21	34446688	34512275	-	5713	protein_coding	potassium voltage-gated channel subfamily E regulatory subunit 1 [Source:HGNC Symbol;Acc:HGNC:6240]	-	2.74	1.75	0.575199	0.0309565	0.754494
ENSG00000232860	SMG7-AS1	1	183460874	183472265	-	3383	processed_transcript	SMG7 antisense RNA 1 [Source:HGNC Symbol;Acc:HGNC:24518]	-	0.18	0.05	0.784265	0.0311583	NA
ENSG00000248791	AC010627.1	5	14620020	14621313	+	1294	processed_pseudogene	pleckstrin homology domain containing, family A (phosphoinositide binding specific) member 1 (PLEKHA1) pseudogene	-	0.63	0.21	0.78832	0.0311698	0.757971
ENSG00000198075	SULT1C4	2	108377911	108388057	+	2898	protein_coding	sulfotransferase family 1C member 4 [Source:HGNC Symbol;Acc:HGNC:11457]	-	0.09	0.01	0.695188	0.031197	NA
ENSG00000180644	PRF1	10	70597348	70602775	-	2534	protein_coding	perforin 1 [Source:HGNC Symbol;Acc:HGNC:9360]	-	142.82	226.77	-0.54477	0.0312367	0.757971
ENSG00000184574	LPAR5	12	6618835	6636447	-	3258	protein_coding	lysophosphatidic acid receptor 5 [Source:HGNC Symbol;Acc:HGNC:13307]	-	7.26	9.45	-0.326417	0.0312543	0.757971
ENSG00000205277	MUC12	7	100969623	101018949	+	17130	protein_coding	mucin 12, cell surface associated [Source:HGNC Symbol;Acc:HGNC:7510]	-	0.02	0.04	-0.765532	0.0313341	0.757971
ENSG00000259820	AC083843.2	8	134792020	134798272	-	6253	lincRNA	novel transcript	-	0.96	0.68	0.474355	0.0313545	0.757971
ENSG00000171643	S100Z	5	76850001	76921650	+	1954	protein_coding	S100 calcium binding protein Z [Source:HGNC Symbol;Acc:HGNC:30367]	-	13.4	9.06	0.527837	0.0316156	0.762772
ENSG00000226853	AC010894.2	2	174487389	174488386	+	791	lincRNA	novel transcript	-	0.39	0.08	0.752459	0.0316251	NA
ENSG00000225194	LINC00092	9	96019724	96027993	-	4849	lincRNA	long intergenic non-protein coding RNA 92 [Source:HGNC Symbol;Acc:HGNC:31408]	-	0.17	0.43	-0.769608	0.0316558	0.762772
ENSG00000138778	CENPE	4	103105806	103198409	-	9444	protein_coding	centromere protein E [Source:HGNC Symbol;Acc:HGNC:1856]	-	0.16	0.3	-0.64249	0.0317341	0.763418
ENSG00000163577	EIF5A2	3	170888415	170908693	-	5593	protein_coding	eukaryotic translation initiation factor 5A2 [Source:HGNC Symbol;Acc:HGNC:3301]	-	0.95	1.36	-0.440141	0.0319128	0.766474
ENSG00000132485	ZRANB2	1	71063291	71081297	-	4993	protein_coding	zinc finger RANBP2-type containing 2 [Source:HGNC Symbol;Acc:HGNC:13058]	-	7.49	6.22	0.300272	0.0320624	0.768823
ENSG00000267053	AC012617.1	19	36304580	36312668	+	2674	lincRNA	uncharacterized LOC100134317 [Source:NCBI gene;Acc:100134317]	-	0	0.06	-0.596699	0.0322991	NA
ENSG00000229644	NAMPTP1	10	36521721	36524234	-	2514	processed_pseudogene	nicotinamide phosphoribosyltransferase pseudogene 1 [Source:HGNC Symbol;Acc:HGNC:17633]	-	50.56	76.96	-0.50103	0.0323077	0.773458
ENSG00000253821	AC090796.1	8	57492884	57591559	+	647	lincRNA	novel transcript	-	0.55	0.14	0.7677	0.0326274	NA
ENSG00000237276	ANO7L1	1	16215909	16228027	-	1990	transcribed_unprocessed_pseudogene	anoctamin 7 like 1 [Source:HGNC Symbol;Acc:HGNC:32248]	-	0.78	0.39	0.719295	0.0326673	0.778909
ENSG00000185482	STAC3	12	57243453	57251193	-	2096	protein_coding	SH3 and cysteine rich domain 3 [Source:HGNC Symbol;Acc:HGNC:28423]	-	4.36	3.41	0.371775	0.0326972	0.778909
ENSG00000117115	PADI2	1	17066761	17119435	-	5984	protein_coding	peptidyl arginine deiminase 2 [Source:HGNC Symbol;Acc:HGNC:18341]	-	42.95	54.8	-0.302696	0.032786	0.778909
ENSG00000211949	IGHV3-23	14	106268606	106269140	-	432	IG_V_gene	immunoglobulin heavy variable 3-23 [Source:HGNC Symbol;Acc:HGNC:5588]	-	32.24	49.82	-0.522405	0.0328551	0.778909
ENSG00000117640	MTFR1L	1	25818640	25832942	+	5817	protein_coding	mitochondrial fission regulator 1 like [Source:HGNC Symbol;Acc:HGNC:28836]	-	1.78	1.32	0.43128	0.0328641	0.778909
ENSG00000150051	MKX	10	27672875	27746060	-	4106	protein_coding	mohawk homeobox [Source:HGNC Symbol;Acc:HGNC:23729]	Others	0.2	0.08	0.765057	0.0328673	0.778909
ENSG00000215105	TTC3P1	X	75740831	75746911	-	6081	processed_pseudogene	tetratricopeptide repeat domain 3 pseudogene 1 [Source:HGNC Symbol;Acc:HGNC:23318]	-	0.08	0.18	-0.731084	0.0329028	0.778909
ENSG00000181191	PJA1	X	69160851	69165793	-	3117	protein_coding	praja ring finger ubiquitin ligase 1 [Source:HGNC Symbol;Acc:HGNC:16648]	-	3.9	5.17	-0.348771	0.0329905	0.779741
ENSG00000134824	FADS2	11	61792980	61867354	+	11026	protein_coding	fatty acid desaturase 2 [Source:HGNC Symbol;Acc:HGNC:3575]	-	0.74	1.09	-0.474425	0.0332023	0.783501
ENSG00000198732	SMOC1	14	69854131	70032366	+	4369	protein_coding	SPARC related modular calcium binding 1 [Source:HGNC Symbol;Acc:HGNC:20318]	-	0.02	0.09	-0.73265	0.0332631	NA
ENSG00000161944	ASGR2	17	7101322	7115700	-	2490	protein_coding	asialoglycoprotein receptor 2 [Source:HGNC Symbol;Acc:HGNC:743]	-	8.24	5.65	0.508696	0.0334133	0.786926
ENSG00000155846	PPARGC1B	5	149730298	149855022	+	12889	protein_coding	PPARG coactivator 1 beta [Source:HGNC Symbol;Acc:HGNC:30022]	-	1.09	0.76	0.502644	0.0334848	0.786926
ENSG00000136235	GPNMB	7	23235967	23275108	+	6040	protein_coding	glycoprotein nmb [Source:HGNC Symbol;Acc:HGNC:4462]	-	0.13	0.04	0.777712	0.0335065	0.786926
ENSG00000110315	RNF141	11	10511678	10541230	-	7820	protein_coding	ring finger protein 141 [Source:HGNC Symbol;Acc:HGNC:21159]	-	12.4	15.6	-0.279855	0.0339709	0.796182
ENSG00000158805	ZNF276	16	89720400	89740903	+	7427	protein_coding	zinc finger protein 276 [Source:HGNC Symbol;Acc:HGNC:23330]	zf-C2H2	11.99	14.8	-0.254064	0.0340079	0.796182
ENSG00000108861	DUSP3	17	43766121	43778988	-	5012	protein_coding	dual specificity phosphatase 3 [Source:HGNC Symbol;Acc:HGNC:3069]	-	8.53	6.86	0.337738	0.0341613	0.798513
ENSG00000038274	MAT2B	5	163503114	163519336	+	5153	protein_coding	methionine adenosyltransferase 2B [Source:HGNC Symbol;Acc:HGNC:6905]	-	27.95	34.44	-0.252487	0.0342525	0.799388
ENSG00000226889	AL359541.1	1	161765325	161766227	-	575	antisense	novel transcript	-	0.32	0	0.589962	0.0343025	NA
ENSG00000181007	ZFP82	19	36383120	36418656	-	7506	protein_coding	ZFP82 zinc finger protein [Source:HGNC Symbol;Acc:HGNC:28682]	zf-C2H2	0.73	1.02	-0.399984	0.0343574	0.800577
ENSG00000269904	MAP2K4P1	X	73524275	73563085	-	2539	transcribed_processed_pseudogene	mitogen-activated protein kinase kinase 4 pseudogene 1 [Source:HGNC Symbol;Acc:HGNC:43837]	-	0.12	0.33	-0.769471	0.0344509	0.801496
ENSG00000135951	TSGA10	2	98997261	99154964	-	7375	protein_coding	testis specific 10 [Source:HGNC Symbol;Acc:HGNC:14927]	-	0.7	0.44	0.58395	0.0345676	0.802486
ENSG00000198846	TOX	8	58805418	59119208	-	4131	protein_coding	thymocyte selection associated high mobility group box [Source:HGNC Symbol;Acc:HGNC:18988]	HMG	3.19	5.14	-0.553569	0.0346016	0.802486
ENSG00000161558	TMEM143	19	48332356	48364237	-	3701	protein_coding	transmembrane protein 143 [Source:HGNC Symbol;Acc:HGNC:25603]	-	3.22	2.43	0.406363	0.0346561	0.802496
ENSG00000275302	CCL4	17	36103590	36105621	+	2032	protein_coding	C-C motif chemokine ligand 4 [Source:HGNC Symbol;Acc:HGNC:10630]	-	8.33	14.27	-0.604337	0.0349438	0.807899
ENSG00000196071	OR2L13	1	248095184	248101103	+	2019	protein_coding	olfactory receptor family 2 subfamily L member 13 [Source:HGNC Symbol;Acc:HGNC:19578]	-	0.11	0.01	0.644842	0.0351964	NA
ENSG00000189190	ZNF600	19	52749942	52786807	-	6964	protein_coding	zinc finger protein 600 [Source:HGNC Symbol;Acc:HGNC:30951]	zf-C2H2	3.33	4.76	-0.436291	0.0352054	0.811873
ENSG00000131558	EXOC4	7	133253073	134066589	+	9466	protein_coding	exocyst complex component 4 [Source:HGNC Symbol;Acc:HGNC:30389]	-	3.97	5	-0.281921	0.0352657	0.811873
ENSG00000154914	USP43	17	9644698	9729691	+	5068	protein_coding	ubiquitin specific peptidase 43 [Source:HGNC Symbol;Acc:HGNC:20072]	-	0.08	0.21	-0.755222	0.0352798	0.811873
ENSG00000183250	LINC01547	21	44932814	44939913	-	2656	lincRNA	long intergenic non-protein coding RNA 1547 [Source:HGNC Symbol;Acc:HGNC:15707]	-	7.65	5.05	0.551562	0.0355032	0.815749
ENSG00000174132	FAM174A	5	100535305	100586741	+	1416	protein_coding	family with sequence similarity 174 member A [Source:HGNC Symbol;Acc:HGNC:24943]	-	11.22	16.97	-0.482868	0.0357586	0.818452
ENSG00000092345	DAZL	3	16586792	16670306	-	3631	protein_coding	deleted in azoospermia like [Source:HGNC Symbol;Acc:HGNC:2685]	-	0.09	0.26	-0.765074	0.0357848	0.818452
ENSG00000131386	GALNT15	3	16174649	16231992	+	6013	protein_coding	polypeptide N-acetylgalactosaminyltransferase 15 [Source:HGNC Symbol;Acc:HGNC:21531]	-	0	0.03	-0.579826	0.0357852	NA
ENSG00000234117	AL445224.1	6	116492297	116497099	+	737	antisense	novel transcript, antisense to BET3L	-	0	0.21	-0.579826	0.0357852	NA
ENSG00000107147	KCNT1	9	135702185	135795508	+	12183	protein_coding	potassium sodium-activated channel subfamily T member 1 [Source:HGNC Symbol;Acc:HGNC:18865]	-	0.2	0.12	0.617799	0.0357862	0.818452
ENSG00000075234	TTC38	22	46267961	46294008	+	3578	protein_coding	tetratricopeptide repeat domain 38 [Source:HGNC Symbol;Acc:HGNC:26082]	-	12.78	17.82	-0.405465	0.0359982	0.819517
ENSG00000211799	TRAV19	14	22007512	22008181	+	467	TR_V_gene	T cell receptor alpha variable 19 [Source:HGNC Symbol;Acc:HGNC:12115]	-	5.54	8.38	-0.490512	0.0360185	0.819517
ENSG00000174844	DNAH12	3	57293699	57544344	-	13275	protein_coding	dynein axonemal heavy chain 12 [Source:HGNC Symbol;Acc:HGNC:2943]	-	0.05	0.02	0.760915	0.0360823	NA
ENSG00000127743	IL17B	5	149371324	149404202	-	1211	protein_coding	interleukin 17B [Source:HGNC Symbol;Acc:HGNC:5982]	-	0.47	0.15	0.766429	0.0361004	NA
ENSG00000226660	TRBV2	7	142300924	142301432	+	421	TR_V_gene	T cell receptor beta variable 2 [Source:HGNC Symbol;Acc:HGNC:12195]	-	8.84	20.52	-0.745216	0.0361347	0.819517
ENSG00000227855	DPY19L2P3	7	29650227	29742594	+	4263	transcribed_unprocessed_pseudogene	DPY19L2 pseudogene 3 [Source:HGNC Symbol;Acc:HGNC:22367]	-	0.22	0.09	0.75732	0.0361777	0.819517
ENSG00000271780	AL118558.3	14	101948347	101949425	+	1079	lincRNA	novel transcript	-	0.89	0.39	0.749936	0.0361788	0.819517
ENSG00000143816	WNT9A	1	227918656	227947898	-	3971	protein_coding	Wnt family member 9A [Source:HGNC Symbol;Acc:HGNC:12778]	-	0.03	0.13	-0.760686	0.0361974	NA
ENSG00000213020	ZNF611	19	52702813	52735073	-	7148	protein_coding	zinc finger protein 611 [Source:HGNC Symbol;Acc:HGNC:28766]	zf-C2H2	2.62	3.39	-0.317093	0.0362054	0.819517
ENSG00000134575	ACP2	11	47239302	47248906	-	3484	protein_coding	acid phosphatase 2, lysosomal [Source:HGNC Symbol;Acc:HGNC:123]	-	4.79	3.62	0.404266	0.0362193	0.819517
ENSG00000232634	NEFLP1	Y	21221106	21222089	-	984	processed_pseudogene	neurofilament light pseudogene 1 [Source:HGNC Symbol;Acc:HGNC:37662]	-	0.24	0	0.577604	0.0362442	NA
ENSG00000137807	KIF23	15	69414246	69448427	+	6576	protein_coding	kinesin family member 23 [Source:HGNC Symbol;Acc:HGNC:6392]	-	0.33	0.21	0.579696	0.0365171	0.82461
ENSG00000196581	AJAP1	1	4654732	4792534	+	12405	protein_coding	adherens junctions associated protein 1 [Source:HGNC Symbol;Acc:HGNC:30801]	-	0.45	0.27	0.619303	0.0365555	0.82461
ENSG00000136295	TTYH3	7	2631951	2664802	+	6129	protein_coding	tweety family member 3 [Source:HGNC Symbol;Acc:HGNC:22222]	-	25.74	21.52	0.288298	0.0366664	0.825857
ENSG00000269460	AC005515.1	19	39685244	39694577	+	289	lincRNA	novel transcript	-	0.29	1.54	-0.718953	0.0367319	NA
ENSG00000181847	TIGIT	3	114276913	114310288	+	6091	protein_coding	T cell immunoreceptor with Ig and ITIM domains [Source:HGNC Symbol;Acc:HGNC:26838]	-	6.23	10.47	-0.591301	0.0367474	0.826202
ENSG00000211950	IGHV1-24	14	106276548	106277043	-	411	IG_V_gene	immunoglobulin heavy variable 1-24 [Source:HGNC Symbol;Acc:HGNC:5551]	-	3.59	9.74	-0.761916	0.0367931	0.826202
ENSG00000112799	LY86	6	6588108	6654983	+	1254	protein_coding	lymphocyte antigen 86 [Source:HGNC Symbol;Acc:HGNC:16837]	-	22.3	17.29	0.378405	0.0369505	0.826832
ENSG00000269220	LINC00528	22	17777322	17779481	+	2160	lincRNA	long intergenic non-protein coding RNA 528 [Source:HGNC Symbol;Acc:HGNC:26875]	-	7.25	5.54	0.393953	0.0370344	0.826832
ENSG00000151650	VENTX	10	133237404	133241929	+	2911	protein_coding	VENT homeobox [Source:HGNC Symbol;Acc:HGNC:13639]	Homeobox	6.85	4.67	0.518067	0.0370445	0.826832
ENSG00000233276	GPX1	3	49357171	49358600	-	1430	polymorphic_pseudogene	glutathione peroxidase 1 [Source:HGNC Symbol;Acc:HGNC:4553]	-	344.94	272.36	0.355266	0.0370773	0.826832
ENSG00000196735	HLA-DQA1	6	32628179	32647062	+	6927	protein_coding	major histocompatibility complex, class II, DQ alpha 1 [Source:HGNC Symbol;Acc:HGNC:4942]	-	9.34	15.4	-0.577396	0.0370997	0.826832
ENSG00000241769	LINC00893	X	149527591	149540959	-	3604	antisense	long intergenic non-protein coding RNA 893 [Source:HGNC Symbol;Acc:HGNC:44265]	-	2.04	1.52	0.42122	0.037268	0.827096
ENSG00000135362	PRR5L	11	36296288	36465204	+	6616	protein_coding	proline rich 5 like [Source:HGNC Symbol;Acc:HGNC:25878]	-	9.39	12.02	-0.306087	0.0373234	0.827096
ENSG00000143226	FCGR2A	1	161505430	161524013	+	5314	protein_coding	Fc fragment of IgG receptor IIa [Source:HGNC Symbol;Acc:HGNC:3616]	-	50.39	63.65	-0.285363	0.0373237	0.827096
ENSG00000182796	TMEM198B	12	55829608	55836246	+	4377	transcribed_unitary_pseudogene	transmembrane protein 198B (pseudogene) [Source:HGNC Symbol;Acc:HGNC:43629]	-	4.22	3.18	0.416053	0.0373675	0.827096
ENSG00000196743	GM2A	5	151212150	151270440	+	4479	protein_coding	GM2 ganglioside activator [Source:HGNC Symbol;Acc:HGNC:4367]	-	22.73	14.71	0.573097	0.0374387	0.827096
ENSG00000048052	HDAC9	7	18086949	19002416	+	16827	protein_coding	histone deacetylase 9 [Source:HGNC Symbol;Acc:HGNC:14065]	-	1.66	2.21	-0.35209	0.0374606	0.827096
ENSG00000075391	RASAL2	1	178094141	178484147	+	16044	protein_coding	RAS protein activator like 2 [Source:HGNC Symbol;Acc:HGNC:9874]	-	0.1	0.06	0.662894	0.0375027	0.827096
ENSG00000100505	TRIM9	14	50975262	51096061	-	8945	protein_coding	tripartite motif containing 9 [Source:HGNC Symbol;Acc:HGNC:16288]	-	0.44	0.66	-0.497394	0.0375825	0.827096
ENSG00000107338	SHB	9	37919134	38069211	-	2783	protein_coding	SH2 domain containing adaptor protein B [Source:HGNC Symbol;Acc:HGNC:10838]	-	0	0.05	-0.571079	0.0375898	NA
ENSG00000252945	RF00593	14	50844625	50844712	+	88	snoRNA		-	0	1.83	-0.571079	0.0375898	NA
ENSG00000258643	BCL2L2-PABPN1	14	23306835	23325369	+	1548	protein_coding	BCL2L2-PABPN1 readthrough [Source:HGNC Symbol;Acc:HGNC:42959]	-	1.64	1	0.606057	0.037613	0.827096
ENSG00000228314	CYP4F29P	21	13843133	13848364	-	1717	transcribed_unprocessed_pseudogene	cytochrome P450 family 4 subfamily F member 29, pseudogene [Source:HGNC Symbol;Acc:HGNC:2647]	-	2.24	3.72	-0.576217	0.0378383	0.82865
ENSG00000213085	CFAP45	1	159872364	159900163	-	2625	protein_coding	cilia and flagella associated protein 45 [Source:HGNC Symbol;Acc:HGNC:17229]	-	3.33	2.13	0.575326	0.0378386	0.82865
ENSG00000179168	GGN	19	38384265	38388082	-	2447	protein_coding	gametogenetin [Source:HGNC Symbol;Acc:HGNC:18869]	-	0.2	0.04	0.725173	0.0378414	NA
ENSG00000066583	ISOC1	5	129094751	129114028	+	1940	protein_coding	isochorismatase domain containing 1 [Source:HGNC Symbol;Acc:HGNC:24254]	-	6.98	9.1	-0.326241	0.0378975	0.82865
ENSG00000125726	CD70	19	6583183	6604103	-	1532	protein_coding	CD70 molecule [Source:HGNC Symbol;Acc:HGNC:11937]	-	1.3	2.1	-0.548516	0.0379333	0.82865
ENSG00000075340	ADD2	2	70607618	70768225	-	12673	protein_coding	adducin 2 [Source:HGNC Symbol;Acc:HGNC:244]	-	0.45	0.67	-0.47441	0.0379628	0.82865
ENSG00000168389	MFSD2A	1	39955112	39969968	+	4007	protein_coding	major facilitator superfamily domain containing 2A [Source:HGNC Symbol;Acc:HGNC:25897]	-	1.65	1.07	0.563465	0.0382821	0.834324
ENSG00000121691	CAT	11	34438925	34472062	+	3590	protein_coding	catalase [Source:HGNC Symbol;Acc:HGNC:1516]	-	84.54	59.23	0.483921	0.0383352	0.834324
ENSG00000233901	LINC01503	9	129332300	129359538	+	1594	lincRNA	long intergenic non-protein coding RNA 1503 [Source:HGNC Symbol;Acc:HGNC:51184]	-	9.14	5.26	0.642222	0.0385129	0.834894
ENSG00000130396	AFDN	6	167826922	167972023	+	13720	protein_coding	afadin, adherens junction formation factor [Source:HGNC Symbol;Acc:HGNC:7137]	-	1.49	1.96	-0.331243	0.0385644	0.834894
ENSG00000148803	FUOM	10	133355154	133358035	-	1284	protein_coding	fucose mutarotase [Source:HGNC Symbol;Acc:HGNC:24733]	-	4.87	3.69	0.40761	0.0386686	0.834894
ENSG00000139289	PHLDA1	12	76025447	76033932	-	8069	protein_coding	pleckstrin homology like domain family A member 1 [Source:HGNC Symbol;Acc:HGNC:8933]	-	0.37	0.63	-0.588501	0.0387324	0.834894
ENSG00000112306	RPS12	6	132814441	132817564	+	767	protein_coding	ribosomal protein S12 [Source:HGNC Symbol;Acc:HGNC:10385]	-	850.02	741.58	0.231867	0.0387889	0.834894
ENSG00000185650	ZFP36L1	14	68787660	68796253	-	5160	protein_coding	ZFP36 ring finger protein like 1 [Source:HGNC Symbol;Acc:HGNC:1107]	Others	124.41	156.97	-0.281591	0.0388418	0.834894
ENSG00000065485	PDIA5	3	123067062	123225227	+	4030	protein_coding	protein disulfide isomerase family A member 5 [Source:HGNC Symbol;Acc:HGNC:24811]	-	1.33	0.93	0.492062	0.038932	0.834894
ENSG00000250490	LINC02145	5	6310441	6339884	-	2923	lincRNA	long intergenic non-protein coding RNA 2145 [Source:HGNC Symbol;Acc:HGNC:53005]	-	0.09	0.24	-0.745754	0.0390303	0.834894
ENSG00000145777	TSLP	5	111070062	111078024	+	4282	protein_coding	thymic stromal lymphopoietin [Source:HGNC Symbol;Acc:HGNC:30743]	-	0.05	0	0.566139	0.0390359	NA
ENSG00000142227	EMP3	19	48321509	48330553	+	1667	protein_coding	epithelial membrane protein 3 [Source:HGNC Symbol;Acc:HGNC:3335]	-	84.7	103.9	-0.248155	0.0390368	0.834894
ENSG00000180182	MED14	X	40648306	40735858	-	9656	protein_coding	mediator complex subunit 14 [Source:HGNC Symbol;Acc:HGNC:2370]	-	4.62	5.71	-0.257835	0.0390402	0.834894
ENSG00000121742	GJB6	13	20221962	20232395	-	3300	protein_coding	gap junction protein beta 6 [Source:HGNC Symbol;Acc:HGNC:4288]	-	0.01	0.08	-0.703567	0.0390912	NA
ENSG00000172250	SERHL	22	42500579	42512560	+	1742	transcribed_unitary_pseudogene	serine hydrolase-like (pseudogene) [Source:HGNC Symbol;Acc:HGNC:14408]	-	1.3	0.78	0.612732	0.0390974	0.834894
ENSG00000131981	LGALS3	14	55124110	55145413	+	2397	protein_coding	galectin 3 [Source:HGNC Symbol;Acc:HGNC:6563]	-	34.37	25.85	0.407629	0.0391711	0.834894
ENSG00000184226	PCDH9	13	66302834	67230445	-	30944	protein_coding	protocadherin 9 [Source:HGNC Symbol;Acc:HGNC:8661]	-	0.17	0.25	-0.415927	0.0391865	0.834894
ENSG00000128805	ARHGAP22	10	48446034	48656265	-	6783	protein_coding	Rho GTPase activating protein 22 [Source:HGNC Symbol;Acc:HGNC:30320]	-	1.04	0.76	0.450351	0.0392249	0.834894
ENSG00000171084	FAM86JP	3	125916620	125930024	+	2519	transcribed_unprocessed_pseudogene	family with sequence similarity 86 member J, pseudogene [Source:HGNC Symbol;Acc:HGNC:44097]	-	0.17	0.38	-0.722827	0.0392321	0.834894
ENSG00000230006	ANKRD36BP2	2	88765807	88806612	+	8042	transcribed_unprocessed_pseudogene	ankyrin repeat domain 36B pseudogene 2 [Source:HGNC Symbol;Acc:HGNC:33607]	-	0.63	0.45	0.471868	0.0392613	0.834894
ENSG00000178175	ZNF366	5	72442652	72507727	-	3975	protein_coding	zinc finger protein 366 [Source:HGNC Symbol;Acc:HGNC:18316]	zf-C2H2	0.66	0.42	0.558047	0.0395253	0.83739
ENSG00000228486	C2orf92	2	97664217	97703064	+	6501	protein_coding	chromosome 2 open reading frame 92 [Source:HGNC Symbol;Acc:HGNC:49272]	-	0.95	0.72	0.403053	0.0395511	0.83739
ENSG00000196787	HIST1H2AG	6	27133042	27135291	+	2250	protein_coding	histone cluster 1 H2A family member g [Source:HGNC Symbol;Acc:HGNC:4737]	-	1.51	2.85	-0.647313	0.0396518	0.83739
ENSG00000204060	FOXO6	1	41361922	41383590	+	2398	protein_coding	forkhead box O6 [Source:HGNC Symbol;Acc:HGNC:24814]	Fork	0.08	0.24	-0.752161	0.0397315	NA
ENSG00000103148	NPRL3	16	84271	138860	-	6609	protein_coding	NPR3 like, GATOR1 complex subunit [Source:HGNC Symbol;Acc:HGNC:14124]	-	22.06	15.51	0.474481	0.039774	0.83739
ENSG00000131067	GGT7	20	34844720	34872860	-	2966	protein_coding	gamma-glutamyltransferase 7 [Source:HGNC Symbol;Acc:HGNC:4259]	-	10.37	8.37	0.336327	0.0398344	0.83739
ENSG00000248213	CICP16	4	118635970	118638782	-	2813	processed_pseudogene	capicua transcriptional repressor pseudogene 16 [Source:HGNC Symbol;Acc:HGNC:38550]	-	0.61	0.34	0.658774	0.0398381	0.83739
ENSG00000145649	GZMA	5	55102648	55110252	+	894	protein_coding	granzyme A [Source:HGNC Symbol;Acc:HGNC:4708]	-	82.2	133.27	-0.556434	0.0399465	0.83739
ENSG00000127511	SIN3B	19	16829400	16880353	+	8777	protein_coding	SIN3 transcription regulator family member B [Source:HGNC Symbol;Acc:HGNC:19354]	-	17.5	14.49	0.301869	0.0399637	0.83739
ENSG00000196542	SPTSSB	3	161344792	161372880	-	3745	protein_coding	serine palmitoyltransferase small subunit B [Source:HGNC Symbol;Acc:HGNC:24045]	-	0.41	0.76	-0.646905	0.0399971	0.83739
ENSG00000261693	AC134682.1	8	142403652	142407028	+	3377	antisense	novel transcript, antisense to TSNARE1	-	0.05	0	0.564517	0.0400495	NA
ENSG00000026751	SLAMF7	1	160739057	160754821	+	4833	protein_coding	SLAM family member 7 [Source:HGNC Symbol;Acc:HGNC:21394]	-	14.1	20.39	-0.44594	0.0401189	0.83739
ENSG00000132967	HMGB1P5	3	22381819	22382929	+	1111	transcribed_processed_pseudogene	high mobility group box 1 pseudogene 5 [Source:HGNC Symbol;Acc:HGNC:4997]	-	18.41	24.66	-0.361794	0.0401423	0.83739
ENSG00000090376	IRAK3	12	66188879	66254622	+	10004	protein_coding	interleukin 1 receptor associated kinase 3 [Source:HGNC Symbol;Acc:HGNC:17020]	-	9.43	7.16	0.404872	0.0402047	0.83739
ENSG00000163565	IFI16	1	158999968	159055155	+	5294	protein_coding	interferon gamma inducible protein 16 [Source:HGNC Symbol;Acc:HGNC:5395]	-	45.15	57.74	-0.298005	0.0402193	0.83739
ENSG00000158079	PTPDC1	9	94030794	94109856	+	6404	protein_coding	protein tyrosine phosphatase domain containing 1 [Source:HGNC Symbol;Acc:HGNC:30184]	-	0.73	0.53	0.450361	0.0402424	0.83739
ENSG00000277734	TRAC	14	22547506	22552154	+	976	TR_C_gene	T cell receptor alpha constant [Source:HGNC Symbol;Acc:HGNC:12029]	-	193.68	269.01	-0.405859	0.0402575	0.83739
ENSG00000168268	NT5DC2	3	52524385	52535054	-	4719	protein_coding	5'-nucleotidase domain containing 2 [Source:HGNC Symbol;Acc:HGNC:25717]	-	1.49	0.83	0.66381	0.0402814	0.83739
ENSG00000170954	ZNF415	19	53107879	53133077	-	3780	protein_coding	zinc finger protein 415 [Source:HGNC Symbol;Acc:HGNC:20636]	zf-C2H2	0.15	0.31	-0.705322	0.0403986	0.838653
ENSG00000164300	SERINC5	5	80111651	80256079	-	9570	protein_coding	serine incorporator 5 [Source:HGNC Symbol;Acc:HGNC:18825]	-	3	2.53	0.276747	0.0405459	0.839551
ENSG00000134470	IL15RA	10	5943639	5978187	-	3634	protein_coding	interleukin 15 receptor subunit alpha [Source:HGNC Symbol;Acc:HGNC:5978]	-	5.07	4.17	0.309975	0.0405704	0.839551
ENSG00000162804	SNED1	2	240998838	241095568	+	13592	protein_coding	sushi, nidogen and EGF like domains 1 [Source:HGNC Symbol;Acc:HGNC:24696]	-	0.17	0.11	0.584965	0.0407373	0.839551
ENSG00000162426	SLC45A1	1	8317826	8344167	+	2888	protein_coding	solute carrier family 45 member 1 [Source:HGNC Symbol;Acc:HGNC:17939]	-	0.14	0.31	-0.710318	0.0407958	0.839551
ENSG00000127586	CHTF18	16	788046	800737	+	5916	protein_coding	chromosome transmission fidelity factor 18 [Source:HGNC Symbol;Acc:HGNC:18435]	-	3	2.45	0.322938	0.0408024	0.839551
ENSG00000198648	STK39	2	167954020	168248141	-	4247	protein_coding	serine/threonine kinase 39 [Source:HGNC Symbol;Acc:HGNC:17717]	-	7.11	9.72	-0.383218	0.0408197	0.839551
ENSG00000130300	PLVAP	19	17351448	17377350	-	2305	protein_coding	plasmalemma vesicle associated protein [Source:HGNC Symbol;Acc:HGNC:13635]	-	1.47	2.58	-0.613343	0.0408378	0.839551
ENSG00000107485	GATA3	10	8045378	8075203	+	3436	protein_coding	GATA binding protein 3 [Source:HGNC Symbol;Acc:HGNC:4172]	zf-GATA	9.09	13	-0.437015	0.040903	0.839729
ENSG00000101280	ANGPT4	20	869899	916317	-	4676	protein_coding	angiopoietin 4 [Source:HGNC Symbol;Acc:HGNC:487]	-	0.99	0.68	0.505107	0.0409789	0.839906
ENSG00000139055	ERP27	12	14914035	14939082	-	2426	protein_coding	endoplasmic reticulum protein 27 [Source:HGNC Symbol;Acc:HGNC:26495]	-	3.97	3.14	0.359348	0.0410411	0.839906
ENSG00000053900	ANAPC4	4	25377213	25418498	+	7494	protein_coding	anaphase promoting complex subunit 4 [Source:HGNC Symbol;Acc:HGNC:19990]	-	7.3	6.23	0.260676	0.0411298	0.839906
ENSG00000257595	LINC02356	12	111369282	111403310	+	353	lincRNA	long intergenic non-protein coding RNA 2356 [Source:HGNC Symbol;Acc:HGNC:53278]	-	3.45	1.58	0.722473	0.041138	0.839906
ENSG00000075303	SLC25A40	7	87833568	87876357	-	5081	protein_coding	solute carrier family 25 member 40 [Source:HGNC Symbol;Acc:HGNC:29680]	-	6.73	5.69	0.272235	0.0412073	0.840164
ENSG00000154188	ANGPT1	8	107249482	107498055	-	7128	protein_coding	angiopoietin 1 [Source:HGNC Symbol;Acc:HGNC:484]	-	0.81	1.25	-0.506577	0.0413448	0.840947
ENSG00000182372	CLN8	8	1755778	1801711	+	9459	protein_coding	CLN8, transmembrane ER and ERGIC protein [Source:HGNC Symbol;Acc:HGNC:2079]	-	0.15	0.28	-0.64373	0.041359	0.840947
ENSG00000230882	AC005077.4	7	76071469	76074963	-	3495	processed_pseudogene	hypothetical protein LOC285908 (LOC285908) pseudogene	-	0.01	0.11	-0.650317	0.0413779	NA
ENSG00000248429	FAM198B-AS1	4	158170752	158202877	+	5639	antisense	FAM198B antisense RNA 1 [Source:HGNC Symbol;Acc:HGNC:53132]	-	0.49	0.25	0.682921	0.0414774	0.841231
ENSG00000141096	DPEP3	16	67975663	67980829	-	2018	protein_coding	dipeptidase 3 [Source:HGNC Symbol;Acc:HGNC:23029]	-	9.53	7.28	0.400089	0.0415041	0.841231
ENSG00000156265	MAP3K7CL	21	29077471	29175889	+	4497	protein_coding	MAP3K7 C-terminal like [Source:HGNC Symbol;Acc:HGNC:16457]	-	17.26	27.81	-0.532884	0.0415579	0.841231
ENSG00000223750	SIRPB3P	20	1665283	1708200	-	1216	unprocessed_pseudogene	signal regulatory protein beta 3, pseudogene [Source:HGNC Symbol;Acc:HGNC:49209]	-	9.26	12.15	-0.334559	0.0416116	0.841231
ENSG00000196937	FAM3C	7	121348851	121396364	-	3422	protein_coding	family with sequence similarity 3 member C [Source:HGNC Symbol;Acc:HGNC:18664]	-	7.39	9.25	-0.271623	0.0416563	0.841231
ENSG00000279088	AC022400.7	10	73742995	73744230	-	1236	TEC	TEC	-	5.32	3.99	0.415918	0.0417269	0.841503
ENSG00000150347	ARID5B	10	61901300	62096944	+	9144	protein_coding	AT-rich interaction domain 5B [Source:HGNC Symbol;Acc:HGNC:17362]	ARID	2.63	3.74	-0.432172	0.0417832	0.841503
ENSG00000230836	LINC01293	2	74940258	74942670	+	1266	lincRNA	long intergenic non-protein coding RNA 1293 [Source:HGNC Symbol;Acc:HGNC:50362]	-	0.32	0.1	0.74095	0.0418768	NA
ENSG00000149927	DOC2A	16	30005509	30023270	-	6426	protein_coding	double C2 domain alpha [Source:HGNC Symbol;Acc:HGNC:2985]	-	0.05	0.01	0.715617	0.041879	NA
ENSG00000117143	UAP1	1	162561506	162599842	+	3437	protein_coding	UDP-N-acetylglucosamine pyrophosphorylase 1 [Source:HGNC Symbol;Acc:HGNC:12457]	-	3.7	4.98	-0.363623	0.0419021	0.842756
ENSG00000102010	BMX	X	15464246	15556529	+	2806	protein_coding	BMX non-receptor tyrosine kinase [Source:HGNC Symbol;Acc:HGNC:1079]	-	1.19	1.92	-0.537932	0.0420196	0.843058
ENSG00000231680	AP003774.3	11	64394342	64395831	-	985	lincRNA	uncharacterized LOC107984366 [Source:NCBI gene;Acc:107984366]	-	3.44	1.75	0.688624	0.0420459	0.843058
ENSG00000237254	TRBV30	7	142812586	142813399	-	447	TR_V_gene	T cell receptor beta variable 30 (gene/pseudogene) [Source:HGNC Symbol;Acc:HGNC:12214]	-	5.02	7.68	-0.496019	0.0420876	0.843058
ENSG00000268797	AC008537.1	19	40801297	40898282	+	575	protein_coding	novel transcript	-	22.66	18.07	0.3445	0.0421926	0.844023
ENSG00000255998	AC069235.1	12	126690479	126695832	+	655	lincRNA	novel transcript	-	0.23	0	0.556146	0.042265	NA
ENSG00000069998	HDHD5	22	17137511	17165287	-	4936	protein_coding	haloacid dehalogenase like hydrolase domain containing 5 [Source:HGNC Symbol;Acc:HGNC:1843]	-	7.23	5.67	0.370214	0.0422876	0.844785
ENSG00000109445	ZNF330	4	141220887	141234697	+	2536	protein_coding	zinc finger protein 330 [Source:HGNC Symbol;Acc:HGNC:15462]	-	12.85	10.9	0.269932	0.0424339	0.846568
ENSG00000204241	AP000911.1	11	134032272	134046849	+	4032	lincRNA	uncharacterized LOC100128239 [Source:NCBI gene;Acc:100128239]	-	0.16	0.06	0.741676	0.0426591	NA
ENSG00000198585	NUDT16	3	131381671	131388830	+	7029	protein_coding	nudix hydrolase 16 [Source:HGNC Symbol;Acc:HGNC:26442]	-	10.58	8.17	0.385733	0.042664	0.847317
ENSG00000164733	CTSB	8	11842524	11869448	-	7428	protein_coding	cathepsin B [Source:HGNC Symbol;Acc:HGNC:2527]	-	52.57	42.59	0.32598	0.0426786	0.847317
ENSG00000153976	HS3ST3A1	17	13495689	13601927	-	2628	protein_coding	heparan sulfate-glucosamine 3-sulfotransferase 3A1 [Source:HGNC Symbol;Acc:HGNC:5196]	-	0.1	0.27	-0.740451	0.0427441	0.847317
ENSG00000232520	AC012507.2	2	230886500	230897091	+	2265	antisense	uncharacterized LOC151484 [Source:NCBI gene;Acc:151484]	-	0.14	0.48	-0.733382	0.0427583	0.847317
ENSG00000241945	PWP2	21	44107290	44131181	+	6922	protein_coding	PWP2, small subunit processome component [Source:HGNC Symbol;Acc:HGNC:9711]	-	0.05	0.25	-0.702142	0.0428037	0.847317
ENSG00000234284	ZNF879	5	179023752	179035064	+	3883	protein_coding	zinc finger protein 879 [Source:HGNC Symbol;Acc:HGNC:37273]	zf-C2H2	1.18	0.77	0.547034	0.0428804	0.847317
ENSG00000146232	NFKBIE	6	44258166	44265788	-	2581	protein_coding	NFKB inhibitor epsilon [Source:HGNC Symbol;Acc:HGNC:7799]	-	12.49	9.38	0.412482	0.042903	0.847317
ENSG00000105538	RASIP1	19	48720587	48740721	-	4149	protein_coding	Ras interacting protein 1 [Source:HGNC Symbol;Acc:HGNC:24716]	-	0.08	0.02	0.725678	0.0429335	NA
ENSG00000198794	SCAMP5	15	74957219	75021496	+	4873	protein_coding	secretory carrier membrane protein 5 [Source:HGNC Symbol;Acc:HGNC:30386]	-	0.53	0.89	-0.571801	0.0429348	0.847317
ENSG00000261512	AC092368.3	16	46622861	46624451	-	1591	lincRNA	novel transcript	-	3.65	4.99	-0.382343	0.043069	0.847317
ENSG00000182010	RTKN2	10	62183035	62268707	-	9548	protein_coding	rhotekin 2 [Source:HGNC Symbol;Acc:HGNC:19364]	-	0.83	1.13	-0.370684	0.0431045	0.847317
ENSG00000230513	THAP7-AS1	22	21001886	21010342	+	2975	antisense	THAP7 antisense RNA 1 [Source:HGNC Symbol;Acc:HGNC:41013]	-	0.19	0.41	-0.694739	0.0431546	0.847317
ENSG00000197044	ZNF441	19	11767000	11784078	+	4748	protein_coding	zinc finger protein 441 [Source:HGNC Symbol;Acc:HGNC:20875]	zf-C2H2	1.65	2.35	-0.422128	0.0431565	0.847317
ENSG00000285554	AC242988.2	1	150173049	150181429	+	1155	lincRNA		-	5.15	3.72	0.458298	0.0433994	0.85096
ENSG00000175262	C1orf127	1	10946471	10982037	-	3573	protein_coding	chromosome 1 open reading frame 127 [Source:HGNC Symbol;Acc:HGNC:26730]	-	0.44	0.24	0.654339	0.0435234	0.852266
ENSG00000160867	FGFR4	5	177086886	177098144	+	4829	protein_coding	fibroblast growth factor receptor 4 [Source:HGNC Symbol;Acc:HGNC:3691]	-	0.18	0.09	0.697437	0.0438074	0.856697
ENSG00000185361	TNFAIP8L1	19	4639518	4655568	+	6667	protein_coding	TNF alpha induced protein 8 like 1 [Source:HGNC Symbol;Acc:HGNC:28279]	-	0.04	0.01	0.686471	0.043837	NA
ENSG00000275740	AC091959.3	5	146203550	146339251	+	3311	protein_coding	novel readthrough transcript	-	0.24	0.45	-0.642752	0.0439564	0.857582
ENSG00000249307	LINC01088	4	78971748	79308798	+	3995	antisense	long intergenic non-protein coding RNA 1088 [Source:HGNC Symbol;Acc:HGNC:49148]	-	0.1	0.26	-0.734571	0.0439989	0.857582
ENSG00000063660	GPC1	2	240435671	240468078	+	6516	protein_coding	glypican 1 [Source:HGNC Symbol;Acc:HGNC:4449]	-	0.1	0.21	-0.688008	0.0440393	0.857582
ENSG00000184611	KCNH7	2	162371407	162838730	-	4974	protein_coding	potassium voltage-gated channel subfamily H member 7 [Source:HGNC Symbol;Acc:HGNC:18863]	-	6.53	4.85	0.426692	0.0440838	0.857582
ENSG00000106089	STX1A	7	73699206	73719672	-	3693	protein_coding	syntaxin 1A [Source:HGNC Symbol;Acc:HGNC:11433]	-	0.24	0.43	-0.622561	0.0442122	0.858955
ENSG00000255549	ENPP7P6	8	12448013	12511278	-	929	transcribed_unprocessed_pseudogene	ectonucleotide pyrophosphatase/phosphodiesterase 7 pseudogene 6 [Source:HGNC Symbol;Acc:HGNC:48698]	-	0.05	0.33	-0.662276	0.044635	NA
ENSG00000131016	AKAP12	6	151239999	151358557	+	8741	protein_coding	A-kinase anchoring protein 12 [Source:HGNC Symbol;Acc:HGNC:370]	-	0.5	0.83	-0.560721	0.0446644	0.866605
ENSG00000111199	TRPV4	12	109783085	109833401	-	3759	protein_coding	transient receptor potential cation channel subfamily V member 4 [Source:HGNC Symbol;Acc:HGNC:18083]	-	0.4	0.19	0.702978	0.0450069	0.869994
ENSG00000103647	CORO2B	15	68578969	68727806	+	3998	protein_coding	coronin 2B [Source:HGNC Symbol;Acc:HGNC:2256]	-	0.68	1.16	-0.578637	0.0450398	0.869994
ENSG00000091732	ZC3HC1	7	130018286	130051451	-	3011	protein_coding	zinc finger C3HC-type containing 1 [Source:HGNC Symbol;Acc:HGNC:29913]	-	1.37	0.99	0.454373	0.0450718	0.869994
ENSG00000267309	AC092295.2	19	36489649	36491040	+	1392	antisense	uncharacterized LOC728752 [Source:NCBI gene;Acc:728752]	-	0.59	1.13	-0.648685	0.0451634	0.869994
ENSG00000181619	GPR135	14	59429022	59465342	-	4977	protein_coding	G protein-coupled receptor 135 [Source:HGNC Symbol;Acc:HGNC:19991]	-	0.59	0.4	0.524304	0.045165	0.869994
ENSG00000050327	ARHGEF5	7	144355288	144380632	+	5818	protein_coding	Rho guanine nucleotide exchange factor 5 [Source:HGNC Symbol;Acc:HGNC:13209]	-	1.12	0.84	0.424972	0.0451907	0.869994
ENSG00000146556	WASH2P	2	113588550	113599043	+	2958	transcribed_unprocessed_pseudogene	WAS protein family homolog 2, pseudogene [Source:HGNC Symbol;Acc:HGNC:33145]	-	16.27	13.64	0.282417	0.0453692	0.87029
ENSG00000157542	KCNJ6	21	37607376	38121345	-	19965	protein_coding	potassium voltage-gated channel subfamily J member 6 [Source:HGNC Symbol;Acc:HGNC:6267]	-	1.19	0.94	0.366769	0.0454206	0.87029
ENSG00000248167	TRIM39-RPP21	6	30328907	30346854	+	1698	protein_coding	TRIM39-RPP21 readthrough [Source:HGNC Symbol;Acc:HGNC:38845]	-	0.37	0.14	0.730996	0.0454344	NA
ENSG00000198885	ITPRIPL1	2	96325331	96330517	+	4652	protein_coding	ITPRIP like 1 [Source:HGNC Symbol;Acc:HGNC:29371]	-	1.99	2.69	-0.371725	0.0455169	0.87029
ENSG00000179082	C9orf106	9	129321016	129324905	+	3145	lincRNA	chromosome 9 open reading frame 106 (putative) [Source:HGNC Symbol;Acc:HGNC:31370]	-	0.44	0.24	0.654862	0.0455559	0.87029
ENSG00000141293	SKAP1	17	48133440	48430275	-	2648	protein_coding	src kinase associated phosphoprotein 1 [Source:HGNC Symbol;Acc:HGNC:15605]	-	16.43	22.29	-0.374046	0.0455661	0.87029
ENSG00000225932	CTAGE4	7	144183466	144186053	+	2588	protein_coding	CTAGE family member 4 [Source:HGNC Symbol;Acc:HGNC:24772]	-	0.01	0.13	-0.629646	0.0455875	NA
ENSG00000278023	RDM1	17	35918066	35930773	-	1975	protein_coding	RAD52 motif containing 1 [Source:HGNC Symbol;Acc:HGNC:19950]	-	0.15	0.38	-0.727055	0.0456022	0.87029
ENSG00000126838	PZP	12	9148840	9208370	-	6227	protein_coding	PZP, alpha-2-macroglobulin like [Source:HGNC Symbol;Acc:HGNC:9750]	-	0.68	1.12	-0.56196	0.0456519	0.87029
ENSG00000233006	MIR3936HG	5	132311285	132369916	-	3059	processed_transcript	MIR3936 host gene [Source:HGNC Symbol;Acc:HGNC:40538]	-	2.86	2.19	0.393677	0.045756	0.87029
ENSG00000228784	LINC00954	2	19868860	19885047	+	4808	lincRNA	long intergenic non-protein coding RNA 954 [Source:HGNC Symbol;Acc:HGNC:48668]	-	3.34	2.73	0.317013	0.0458094	0.87029
ENSG00000196209	SIRPB2	20	1470741	1491587	-	5034	protein_coding	signal regulatory protein beta 2 [Source:HGNC Symbol;Acc:HGNC:16247]	-	22.24	17.11	0.387446	0.0458542	0.87029
ENSG00000258301	VASH1-AS1	14	76781733	76786724	-	1843	lincRNA	VASH1 antisense RNA 1 [Source:HGNC Symbol;Acc:HGNC:53215]	-	1.1	0.63	0.632253	0.0458826	0.87029
ENSG00000236481	LINC02195	16	26584755	26594813	-	294	lincRNA	long intergenic non-protein coding RNA 2195 [Source:HGNC Symbol;Acc:HGNC:53058]	-	0	0.5	-0.536496	0.045943	NA
ENSG00000058091	CDK14	7	90466424	91210590	+	6841	protein_coding	cyclin dependent kinase 14 [Source:HGNC Symbol;Acc:HGNC:8883]	-	3.53	4.73	-0.356187	0.0459481	0.87029
ENSG00000235944	ZNF815P	7	5823160	5854365	+	2302	transcribed_unprocessed_pseudogene	zinc finger protein 815, pseudogene [Source:HGNC Symbol;Acc:HGNC:22029]	-	4.32	6.43	-0.473635	0.046028	0.87029
ENSG00000179698	WDR97	8	144107726	144118315	+	8967	protein_coding	WD repeat domain 97 [Source:HGNC Symbol;Acc:HGNC:26959]	-	0.47	0.32	0.512282	0.0460339	0.87029
ENSG00000188163	FAM166A	9	137243584	137247770	-	1801	protein_coding	family with sequence similarity 166 member A [Source:HGNC Symbol;Acc:HGNC:33818]	-	0	0.08	-0.535644	0.0460787	NA
ENSG00000125657	TNFSF9	19	6530999	6535928	+	1665	protein_coding	TNF superfamily member 9 [Source:HGNC Symbol;Acc:HGNC:11939]	-	0.37	0.73	-0.658634	0.0460869	0.87029
ENSG00000143537	ADAM15	1	155050566	155062775	+	6584	protein_coding	ADAM metallopeptidase domain 15 [Source:HGNC Symbol;Acc:HGNC:193]	-	9.61	6.94	0.458159	0.0461442	0.87029
ENSG00000134884	ARGLU1	13	106541673	106568164	-	5810	protein_coding	arginine and glutamate rich 1 [Source:HGNC Symbol;Acc:HGNC:25482]	-	42.36	35.7	0.276148	0.046337	0.872818
ENSG00000134201	GSTM5	1	109711780	109775428	+	6061	protein_coding	glutathione S-transferase mu 5 [Source:HGNC Symbol;Acc:HGNC:4637]	-	0	0.04	-0.609522	0.046464	NA
ENSG00000096063	SRPK1	6	35832966	35921342	-	6692	protein_coding	SRSF protein kinase 1 [Source:HGNC Symbol;Acc:HGNC:11305]	-	11.95	15.41	-0.306585	0.0464873	0.874538
ENSG00000285018	AC245140.3	X	154374595	154376934	+	680	antisense	novel transcript, antisense to FLNA	-	0.43	1.05	-0.716764	0.0465508	0.874625
ENSG00000177192	PUS1	12	131929200	131945896	+	5732	protein_coding	pseudouridylate synthase 1 [Source:HGNC Symbol;Acc:HGNC:15508]	-	4.8	4.07	0.271197	0.0469932	0.880584
ENSG00000169895	SYAP1	X	16719632	16765336	+	6418	protein_coding	synapse associated protein 1 [Source:HGNC Symbol;Acc:HGNC:16273]	-	4.8	5.95	-0.259651	0.0469967	0.880584
ENSG00000105948	TTC26	7	139133744	139191986	+	4999	protein_coding	tetratricopeptide repeat domain 26 [Source:HGNC Symbol;Acc:HGNC:21882]	-	0.87	1.42	-0.547987	0.0470785	0.880584
ENSG00000112406	HECA	6	139135112	139180802	+	5614	protein_coding	hdc homolog, cell cycle regulator [Source:HGNC Symbol;Acc:HGNC:21041]	-	1.89	2.56	-0.367241	0.047126	0.880584
ENSG00000211751	TRBC1	7	142791694	142793368	+	760	TR_C_gene	T cell receptor beta constant 1 [Source:HGNC Symbol;Acc:HGNC:12156]	-	142.06	193.35	-0.380741	0.0471646	0.880584
ENSG00000259244	AC048382.2	15	84513241	84526949	-	492	processed_transcript	novel transcript	-	0.73	1.76	-0.714511	0.047314	0.881723
ENSG00000171714	ANO5	11	21799934	22283357	+	7547	protein_coding	anoctamin 5 [Source:HGNC Symbol;Acc:HGNC:27337]	-	0.36	0.17	0.702715	0.0473675	0.881723
ENSG00000010610	CD4	12	6786858	6820808	+	4583	protein_coding	CD4 molecule [Source:HGNC Symbol;Acc:HGNC:1678]	-	61.36	52.29	0.260352	0.0474038	0.881723
ENSG00000274776	AC090241.3	18	46786699	46789297	-	2599	lincRNA	novel transcript	-	0.02	0.1	-0.671663	0.047451	NA
ENSG00000163564	PYHIN1	1	158930796	158977054	+	3479	protein_coding	pyrin and HIN domain family member 1 [Source:HGNC Symbol;Acc:HGNC:28894]	-	11.82	16.5	-0.403857	0.0475379	0.882269
ENSG00000268533	AC003002.2	19	57394183	57438457	+	521	protein_coding	novel protein	-	3.9	6.03	-0.503723	0.0475521	0.882269
ENSG00000229855	AC008568.1	5	121199704	121357398	+	2713	lincRNA	uncharacterized LOC102467226 [Source:NCBI gene;Acc:102467226]	-	0.01	0.08	-0.588994	0.0476804	NA
ENSG00000145882	PCYOX1L	5	149358007	149369653	+	6069	protein_coding	prenylcysteine oxidase 1 like [Source:HGNC Symbol;Acc:HGNC:28477]	-	5.05	4.26	0.276295	0.0477936	0.885643
ENSG00000272752	STAG3L5P-PVRIG2P-PILRB	7	100336104	100367831	+	3816	processed_transcript	STAG3L5P-PVRIG2P-PILRB readthrough [Source:HGNC Symbol;Acc:HGNC:48898]	-	0.88	0.61	0.497856	0.0478996	0.88633
ENSG00000170262	MRAP	21	32291813	32314784	+	1346	protein_coding	melanocortin 2 receptor accessory protein [Source:HGNC Symbol;Acc:HGNC:1304]	-	0.23	0.05	0.686323	0.0479849	NA
ENSG00000110077	MS4A6A	11	60172014	60184666	-	5791	protein_coding	membrane spanning 4-domains A6A [Source:HGNC Symbol;Acc:HGNC:13375]	-	32.78	23.49	0.465204	0.0479915	0.88633
ENSG00000272468	AL021807.1	6	27122657	27123221	-	565	lincRNA	novel transcript	-	0.81	1.78	-0.692517	0.0480098	0.88633
ENSG00000097033	SH3GLB1	1	86704570	86748184	+	6881	protein_coding	SH3 domain containing GRB2 like, endophilin B1 [Source:HGNC Symbol;Acc:HGNC:10833]	-	21.54	29.18	-0.361878	0.0481837	0.888436
ENSG00000243238	IGKV2-30	2	89244781	89245596	-	390	IG_V_gene	immunoglobulin kappa variable 2-30 [Source:HGNC Symbol;Acc:HGNC:5785]	-	14.01	23.09	-0.557637	0.0484489	0.888829
ENSG00000198856	OSTC	4	108650584	108667820	+	1617	protein_coding	oligosaccharyltransferase complex non-catalytic subunit [Source:HGNC Symbol;Acc:HGNC:24448]	-	20.54	17.53	0.261289	0.0484569	0.888829
ENSG00000188227	ZNF793	19	37506939	37548762	+	12007	protein_coding	zinc finger protein 793 [Source:HGNC Symbol;Acc:HGNC:33115]	zf-C2H2	0.4	0.59	-0.447737	0.0484582	0.888829
ENSG00000272800	AC021851.1	2	183214319	183215400	+	1082	lincRNA	novel transcript	-	0.49	0.17	0.721085	0.0485097	NA
ENSG00000254689	LINC02235	8	81842618	81923199	+	1343	bidirectional_promoter_lncRNA	long intergenic non-protein coding RNA 2235 [Source:HGNC Symbol;Acc:HGNC:53106]	-	0.1	0	0.531943	0.0485225	NA
ENSG00000111886	GABRR2	6	89257208	89315299	-	2230	protein_coding	gamma-aminobutyric acid type A receptor rho2 subunit [Source:HGNC Symbol;Acc:HGNC:4091]	-	2.17	1.46	0.522216	0.0485415	0.888829
ENSG00000103037	SETD6	16	58515479	58521181	+	5078	protein_coding	SET domain containing 6 [Source:HGNC Symbol;Acc:HGNC:26116]	-	1.93	1.52	0.362335	0.048608	0.888829
ENSG00000124134	KCNS1	20	45092310	45101112	-	4538	protein_coding	potassium voltage-gated channel modifier subfamily S member 1 [Source:HGNC Symbol;Acc:HGNC:6300]	-	0.23	0.12	0.661872	0.0486945	0.888829
ENSG00000163082	SGPP2	2	222424517	222560948	+	3336	protein_coding	sphingosine-1-phosphate phosphatase 2 [Source:HGNC Symbol;Acc:HGNC:19953]	-	0.6	0.91	-0.48937	0.0487327	0.888829
ENSG00000138413	IDH1	2	208236227	208266074	-	4721	protein_coding	isocitrate dehydrogenase (NADP(+)) 1, cytosolic [Source:HGNC Symbol;Acc:HGNC:5382]	-	8.79	7	0.351083	0.0487483	0.888829
ENSG00000103126	AXIN1	16	287440	352673	-	7487	protein_coding	axin 1 [Source:HGNC Symbol;Acc:HGNC:903]	-	14.39	17.65	-0.243638	0.0487893	0.888829
ENSG00000156384	SFR1	10	104122058	104126385	+	1812	protein_coding	SWI5 dependent homologous recombination repair protein 1 [Source:HGNC Symbol;Acc:HGNC:29574]	-	2.44	3.43	-0.41024	0.0488258	0.888829
ENSG00000135114	OASL	12	121019111	121039242	-	3517	protein_coding	2'-5'-oligoadenylate synthetase like [Source:HGNC Symbol;Acc:HGNC:8090]	-	8.51	10.54	-0.258998	0.0488637	0.888829
ENSG00000183317	EPHA10	1	37713880	37765133	-	8152	protein_coding	EPH receptor A10 [Source:HGNC Symbol;Acc:HGNC:19987]	-	0.05	0.01	0.70414	0.0490587	NA
ENSG00000173706	HEG1	3	124965710	125055958	-	9925	protein_coding	heart development protein with EGF like domains 1 [Source:HGNC Symbol;Acc:HGNC:29227]	-	2.9	4.36	-0.47816	0.0492243	0.890444
ENSG00000171747	LGALS4	19	38801671	38813364	-	2645	protein_coding	galectin 4 [Source:HGNC Symbol;Acc:HGNC:6565]	-	0.18	0.38	-0.67576	0.0492747	0.890444
ENSG00000176393	RNPEP	1	201982372	202006147	+	3479	protein_coding	arginyl aminopeptidase [Source:HGNC Symbol;Acc:HGNC:10078]	-	14.47	11.24	0.381267	0.0493261	0.890444
ENSG00000162551	ALPL	1	21509372	21578412	+	3007	protein_coding	alkaline phosphatase, liver/bone/kidney [Source:HGNC Symbol;Acc:HGNC:438]	-	103.52	144.11	-0.395907	0.0493885	0.890444
ENSG00000163923	RPL39L	3	187120948	187180908	-	1060	protein_coding	ribosomal protein L39 like [Source:HGNC Symbol;Acc:HGNC:17094]	-	0.71	1.41	-0.665992	0.0494068	0.890444
ENSG00000151726	ACSL1	4	184755595	184826818	-	6284	protein_coding	acyl-CoA synthetase long chain family member 1 [Source:HGNC Symbol;Acc:HGNC:3569]	-	131.94	181.63	-0.381685	0.0494871	0.890444
ENSG00000204172	AGAP9	10	47501854	47523638	-	2387	protein_coding	ArfGAP with GTPase domain, ankyrin repeat and PH domain 9 [Source:HGNC Symbol;Acc:HGNC:23463]	-	0.49	1.1	-0.70012	0.0495057	0.890444
ENSG00000198919	DZIP3	3	108589682	108694846	+	6972	protein_coding	DAZ interacting zinc finger protein 3 [Source:HGNC Symbol;Acc:HGNC:30938]	-	1.67	2.38	-0.429934	0.0495108	0.890444
ENSG00000085265	FCN1	9	134905890	134917963	-	4981	protein_coding	ficolin 1 [Source:HGNC Symbol;Acc:HGNC:3623]	-	238.55	158.39	0.530768	0.0495182	0.890444
ENSG00000267723	AC011509.2	19	14254189	14293205	-	627	lincRNA	novel transcript	-	0.56	1.49	-0.717511	0.049577	0.890444
ENSG00000095564	BTAF1	10	91923769	92030325	+	7582	protein_coding	B-TFIID TATA-box binding protein associated factor 1 [Source:HGNC Symbol;Acc:HGNC:17307]	-	13.27	11.18	0.279688	0.0496124	0.890444
ENSG00000171604	CXXC5	5	139647299	139683882	+	3852	protein_coding	CXXC finger protein 5 [Source:HGNC Symbol;Acc:HGNC:26943]	-	9.49	12.58	-0.339685	0.0497311	0.891495
ENSG00000143851	PTPN7	1	202147013	202161588	-	5906	protein_coding	protein tyrosine phosphatase, non-receptor type 7 [Source:HGNC Symbol;Acc:HGNC:9659]	-	12.39	10.43	0.277793	0.0498988	0.893028
ENSG00000099904	ZDHHC8	22	20129456	20148007	+	5542	protein_coding	zinc finger DHHC-type containing 8 [Source:HGNC Symbol;Acc:HGNC:18474]	-	10.78	9.19	0.262211	0.04997	0.893028
ENSG00000260947	AL356489.2	9	33697459	33700986	+	3528	lincRNA	novel transcript	-	0.09	0.23	-0.708859	0.0499971	0.893028
ENSG00000184470	TXNRD2	22	19875517	19941992	-	8373	protein_coding	thioredoxin reductase 2 [Source:HGNC Symbol;Acc:HGNC:18155]	-	4.2	3.43	0.316922	0.0500609	0.893094
ENSG00000130881	LRP3	19	33177603	33208867	+	5095	protein_coding	LDL receptor related protein 3 [Source:HGNC Symbol;Acc:HGNC:6695]	-	2.33	1.6	0.504152	0.0501461	0.893278
ENSG00000143870	PDIA6	2	10783391	10837977	-	4101	protein_coding	protein disulfide isomerase family A member 6 [Source:HGNC Symbol;Acc:HGNC:30168]	-	13.58	11.49	0.273388	0.0502688	0.893278
ENSG00000170522	ELOVL6	4	110045846	110199199	-	7297	protein_coding	ELOVL fatty acid elongase 6 [Source:HGNC Symbol;Acc:HGNC:15829]	-	0.83	1.33	-0.529958	0.0502875	0.893278
ENSG00000235010	AL512622.1	10	132181225	132185962	-	798	antisense	novel transcript	-	0.25	0.01	0.559178	0.0503101	NA
ENSG00000239855	IGKV1-6	2	88966262	88966767	-	380	IG_V_gene	immunoglobulin kappa variable 1-6 [Source:HGNC Symbol;Acc:HGNC:5742]	-	0.96	2.94	-0.713339	0.0503554	0.893278
ENSG00000261459	AC002310.5	16	30525923	30534852	-	1515	protein_coding	novel transcript	zf-C2H2	0.36	0.11	0.711191	0.0503649	NA
ENSG00000040633	PHF23	17	7235028	7239722	-	2783	protein_coding	PHD finger protein 23 [Source:HGNC Symbol;Acc:HGNC:28428]	-	16.56	20.73	-0.269634	0.0503721	0.893278
ENSG00000226465	AL390198.1	20	25697003	25752761	+	1040	processed_transcript	novel transcript	-	2.28	1.46	0.551343	0.0505391	0.895169
ENSG00000139112	GABARAPL1	12	10212458	10223130	+	4086	protein_coding	GABA type A receptor associated protein like 1 [Source:HGNC Symbol;Acc:HGNC:4068]	-	18.49	23.42	-0.283568	0.0506985	0.896548
ENSG00000125249	RAP2A	13	97434222	97469128	+	5570	protein_coding	RAP2A, member of RAS oncogene family [Source:HGNC Symbol;Acc:HGNC:9861]	-	5.98	7.53	-0.279793	0.0507601	0.896548
ENSG00000159618	ADGRG5	16	57542421	57591681	+	5852	protein_coding	adhesion G protein-coupled receptor G5 [Source:HGNC Symbol;Acc:HGNC:19010]	-	8.08	11.79	-0.458837	0.0507982	0.896548
ENSG00000264204	AGAP7P	10	46109621	46131358	+	2062	unprocessed_pseudogene	ArfGAP with GTPase domain, ankyrin repeat and PH domain 7, pseudogene [Source:HGNC Symbol;Acc:HGNC:23465]	-	13.76	11.64	0.272354	0.0509488	0.898139
ENSG00000134352	IL6ST	5	55935095	55994993	-	9292	protein_coding	interleukin 6 signal transducer [Source:HGNC Symbol;Acc:HGNC:6021]	-	3.05	2.31	0.411122	0.0510698	0.89829
ENSG00000186765	FSCN2	17	81528396	81537130	+	2019	protein_coding	fascin actin-bundling protein 2, retinal [Source:HGNC Symbol;Acc:HGNC:3960]	-	0.6	0.28	0.68886	0.0510784	0.89829
ENSG00000112701	SENP6	6	75601509	75718278	+	11414	protein_coding	SUMO specific peptidase 6 [Source:HGNC Symbol;Acc:HGNC:20944]	-	12.39	10.49	0.273961	0.0513948	0.90191
ENSG00000151458	ANKRD50	4	124664052	124712732	-	8794	protein_coding	ankyrin repeat domain 50 [Source:HGNC Symbol;Acc:HGNC:29223]	-	1.54	1.17	0.400621	0.0514111	0.90191
ENSG00000126821	SGPP1	14	63684214	63728039	-	3312	protein_coding	sphingosine-1-phosphate phosphatase 1 [Source:HGNC Symbol;Acc:HGNC:17720]	-	8.46	11.05	-0.324901	0.0514665	0.90191
ENSG00000227825	SLC9A7P1	12	98453835	98457145	-	3311	transcribed_processed_pseudogene	solute carrier family 9 member 7 pseudogene 1 [Source:HGNC Symbol;Acc:HGNC:32679]	-	1.53	0.93	0.593278	0.0515574	0.902437
ENSG00000237357	BX088651.4	9	42566679	42569353	-	2579	lincRNA	novel transcript	-	0	0.1	-0.511736	0.051706	NA
ENSG00000274180	NATD1	17	21238870	21253410	-	4931	protein_coding	N-acetyltransferase domain containing 1 [Source:HGNC Symbol;Acc:HGNC:30770]	-	21.05	26.9	-0.293712	0.0517551	0.904831
ENSG00000205126	ACCSL	11	44047981	44059977	+	1867	protein_coding	1-aminocyclopropane-1-carboxylate synthase homolog (inactive) like [Source:HGNC Symbol;Acc:HGNC:34391]	-	0.12	0.01	0.57499	0.0517653	NA
ENSG00000113303	BTNL8	5	180899077	180950906	+	3924	protein_coding	butyrophilin like 8 [Source:HGNC Symbol;Acc:HGNC:26131]	-	7.81	12.02	-0.494381	0.0518918	0.906152
ENSG00000274443	C8orf89	8	73241329	73259502	-	658	protein_coding	chromosome 8 open reading frame 89 [Source:HGNC Symbol;Acc:HGNC:51258]	-	0.02	0.33	-0.576018	0.0519676	NA
ENSG00000113356	POLR3G	5	90471748	90514553	+	4019	protein_coding	RNA polymerase III subunit G [Source:HGNC Symbol;Acc:HGNC:30075]	-	0.33	0.54	-0.552594	0.0520215	0.906681
ENSG00000254810	AP001189.3	11	76654169	76656712	-	651	lincRNA	novel transcript	-	2.06	3.37	-0.545922	0.0521047	0.906681
ENSG00000182287	AP1S2	X	15825806	15854931	-	5371	protein_coding	adaptor related protein complex 1 subunit sigma 2 [Source:HGNC Symbol;Acc:HGNC:560]	-	26.03	21.65	0.293369	0.0521583	0.906681
ENSG00000197497	ZNF665	19	53159213	53193386	-	7475	protein_coding	zinc finger protein 665 [Source:HGNC Symbol;Acc:HGNC:25885]	zf-C2H2	0.36	0.52	-0.452672	0.0522451	0.906681
ENSG00000269313	MAGIX	X	49162564	49168483	+	5107	protein_coding	MAGI family member, X-linked [Source:HGNC Symbol;Acc:HGNC:30006]	-	0.31	0.17	0.641061	0.0522609	0.906681
ENSG00000197976	AKAP17A	X	1591593	1602514	+	4075	protein_coding	A-kinase anchoring protein 17A [Source:HGNC Symbol;Acc:HGNC:18783]	-	47.45	38.93	0.310028	0.0522886	0.906681
ENSG00000267605	AC016590.1	19	37265939	37271518	-	2781	lincRNA	novel transcript	-	0	0.05	-0.513237	0.0523654	NA
ENSG00000198106	SNX29P2	16	29291220	29372110	+	4818	processed_transcript	sorting nexin 29 pseudogene 2 [Source:NCBI gene;Acc:440352]	-	0.74	0.45	0.57874	0.052406	0.906706
ENSG00000275202	AL161421.1	13	48974967	48976867	-	1101	antisense	novel transcript, antisense to FNDC3A	-	0.67	1.24	-0.621279	0.0524181	0.906706
ENSG00000239213	NCK1-DT	3	136841726	136862054	-	1429	antisense	NCK1 divergent transcript [Source:HGNC Symbol;Acc:HGNC:49645]	-	1.11	0.66	0.595874	0.0525072	0.906706
ENSG00000114013	CD86	3	122055366	122121139	+	3433	protein_coding	CD86 molecule [Source:HGNC Symbol;Acc:HGNC:1705]	-	12.55	10.01	0.337878	0.0525343	0.906706
ENSG00000258851	AL139300.2	14	103553421	103561877	+	553	antisense	novel transcript, antisense to BAG5	-	0.87	0.29	0.705522	0.0525409	NA
ENSG00000139116	KIF21A	12	39293228	39443390	-	10117	protein_coding	kinesin family member 21A [Source:HGNC Symbol;Acc:HGNC:19349]	-	1.17	1.85	-0.528043	0.0528023	0.910273
ENSG00000120437	ACAT2	6	159760328	159779055	+	4299	protein_coding	acetyl-CoA acetyltransferase 2 [Source:HGNC Symbol;Acc:HGNC:94]	-	1.79	2.41	-0.366426	0.0529495	0.911752
ENSG00000166126	AMN	14	102922656	102933596	+	4646	protein_coding	amnion associated transmembrane protein [Source:HGNC Symbol;Acc:HGNC:14604]	-	0.78	0.55	0.468148	0.0531328	0.91333
ENSG00000116299	KIAA1324	1	109113679	109206781	+	9300	protein_coding	KIAA1324 [Source:HGNC Symbol;Acc:HGNC:29618]	-	14.55	4.46	0.69677	0.0531643	0.91333
ENSG00000226025	LGALS17A	19	39679374	39686373	+	2570	transcribed_unprocessed_pseudogene	galectin 14 pseudogene [Source:NCBI gene;Acc:400696]	-	0.03	0.15	-0.640766	0.0532175	NA
ENSG00000151704	KCNJ1	11	128836315	128867373	-	4637	protein_coding	potassium voltage-gated channel subfamily J member 1 [Source:HGNC Symbol;Acc:HGNC:6255]	-	0.16	0.07	0.700132	0.0532723	0.914128
ENSG00000120440	TTLL2	6	167325071	167359503	+	3088	protein_coding	tubulin tyrosine ligase like 2 [Source:HGNC Symbol;Acc:HGNC:21211]	-	0.4	0.2	0.662555	0.0533633	0.914632
ENSG00000197965	MPZL1	1	167721192	167791919	+	7069	protein_coding	myelin protein zero like 1 [Source:HGNC Symbol;Acc:HGNC:7226]	-	14.45	11.22	0.381354	0.053749	0.918478
ENSG00000116667	C1orf21	1	184387058	184629020	+	11013	protein_coding	chromosome 1 open reading frame 21 [Source:HGNC Symbol;Acc:HGNC:15494]	-	1.51	2.14	-0.420626	0.0537741	0.918478
ENSG00000122557	HERPUD2	7	35632659	35695571	-	3246	protein_coding	HERPUD family member 2 [Source:HGNC Symbol;Acc:HGNC:21915]	-	26.14	31.7	-0.231944	0.0537772	0.918478
ENSG00000159733	ZFYVE28	4	2269582	2418663	-	9624	protein_coding	zinc finger FYVE-type containing 28 [Source:HGNC Symbol;Acc:HGNC:29334]	-	2.32	3.13	-0.365425	0.0539548	0.918478
ENSG00000136636	KCTD3	1	215567392	215621807	+	4929	protein_coding	potassium channel tetramerization domain containing 3 [Source:HGNC Symbol;Acc:HGNC:21305]	-	0.91	0.67	0.43058	0.0539709	0.918478
ENSG00000122335	SERAC1	6	158109515	158168280	-	11007	protein_coding	serine active site containing 1 [Source:HGNC Symbol;Acc:HGNC:21061]	-	0.76	0.6	0.363803	0.0539987	0.918478
ENSG00000106537	TSPAN13	7	16753535	16784536	+	2224	protein_coding	tetraspanin 13 [Source:HGNC Symbol;Acc:HGNC:21643]	-	4.97	6.77	-0.369424	0.0540209	0.918478
ENSG00000143751	SDE2	1	225982702	225999331	-	3975	protein_coding	SDE2 telomere maintenance homolog [Source:HGNC Symbol;Acc:HGNC:26643]	-	11.12	14.45	-0.314267	0.0541523	0.91966
ENSG00000124193	SRSF6	20	43457928	43464247	+	4593	protein_coding	serine and arginine rich splicing factor 6 [Source:HGNC Symbol;Acc:HGNC:10788]	-	32.31	28.24	0.229962	0.0542643	0.920509
ENSG00000038382	TRIO	5	14143702	14532128	+	17500	protein_coding	trio Rho guanine nucleotide exchange factor [Source:HGNC Symbol;Acc:HGNC:12303]	-	3.74	3.24	0.243959	0.0543614	0.921103
ENSG00000132002	DNAJB1	19	14514770	14529770	-	3672	protein_coding	DnaJ heat shock protein family (Hsp40) member B1 [Source:HGNC Symbol;Acc:HGNC:5270]	-	19.71	25.4	-0.30553	0.0545341	0.922138
ENSG00000145284	SCD5	4	82629539	82798857	-	4292	protein_coding	stearoyl-CoA desaturase 5 [Source:HGNC Symbol;Acc:HGNC:21088]	-	0.89	1.81	-0.665575	0.054552	0.922138
ENSG00000214941	ZSWIM7	17	15976560	15999717	-	2559	protein_coding	zinc finger SWIM-type containing 7 [Source:HGNC Symbol;Acc:HGNC:26993]	-	5.6	4.6	0.305691	0.0546088	0.922138
ENSG00000138829	FBN2	5	128257909	128659185	-	13196	protein_coding	fibrillin 2 [Source:HGNC Symbol;Acc:HGNC:3604]	-	1.3	0.98	0.407394	0.0546863	0.922396
ENSG00000258569	AC007376.2	14	76710658	76761388	-	540	lincRNA	novel transcript	-	1.75	0.75	0.697838	0.0549798	0.924476
ENSG00000265728	AP001099.1	18	10594590	10604798	+	855	lincRNA	novel transcript	-	0.88	1.6	-0.610254	0.0549854	0.924476
ENSG00000115317	HTRA2	2	74529377	74533348	+	3001	protein_coding	HtrA serine peptidase 2 [Source:HGNC Symbol;Acc:HGNC:14348]	-	6.27	4.87	0.372008	0.0550323	0.924476
ENSG00000272079	AC004233.3	16	3006120	3007388	+	1269	lincRNA	novel transcript	-	4.37	3.21	0.433892	0.0551123	0.924476
ENSG00000264954	PRR29-AS1	17	63996071	63999899	-	2926	lincRNA	PRR29 antisense RNA 1 [Source:HGNC Symbol;Acc:HGNC:51822]	-	0.01	0.08	-0.575084	0.0551546	NA
ENSG00000183621	ZNF438	10	30820207	31031937	-	4267	protein_coding	zinc finger protein 438 [Source:HGNC Symbol;Acc:HGNC:21029]	-	9.36	12.32	-0.335134	0.0551759	0.924476
ENSG00000266086	AC015813.2	17	57989038	58007246	-	2270	protein_coding	novel transcript	-	12.94	10.89	0.276277	0.0553432	0.924476
ENSG00000164124	TMEM144	4	158201604	158255411	+	9243	protein_coding	transmembrane protein 144 [Source:HGNC Symbol;Acc:HGNC:25633]	-	0.99	0.68	0.492405	0.0553432	0.924476
ENSG00000162739	SLAMF6	1	160485030	160523262	-	2746	protein_coding	SLAM family member 6 [Source:HGNC Symbol;Acc:HGNC:21392]	-	27.1	37.4	-0.394543	0.0553649	0.924476
ENSG00000128699	ORMDL1	2	189770323	189784371	-	3958	protein_coding	ORMDL sphingolipid biosynthesis regulator 1 [Source:HGNC Symbol;Acc:HGNC:16036]	-	17.31	14.83	0.257321	0.0553965	0.924476
ENSG00000186998	EMID1	22	29205851	29259597	+	4899	protein_coding	EMI domain containing 1 [Source:HGNC Symbol;Acc:HGNC:18036]	-	0.5	0.31	0.569053	0.0554932	0.924476
ENSG00000231345	BEND3P1	10	50655967	50660472	+	2966	transcribed_processed_pseudogene	BEN domain containing 3 pseudogene 1 [Source:HGNC Symbol;Acc:HGNC:45014]	-	0.05	0.47	-0.573388	0.0554996	0.924476
ENSG00000128833	MYO5C	15	52192322	52295798	-	10045	protein_coding	myosin VC [Source:HGNC Symbol;Acc:HGNC:7604]	-	0.19	0.29	-0.531556	0.055557	0.924476
ENSG00000269386	RAB11B-AS1	19	8374373	8390685	-	1156	antisense	RAB11B antisense RNA 1 [Source:HGNC Symbol;Acc:HGNC:44178]	-	2.29	1.53	0.520481	0.0556685	0.924795
ENSG00000178538	CA8	8	60187347	60281412	-	5783	protein_coding	carbonic anhydrase 8 [Source:HGNC Symbol;Acc:HGNC:1382]	-	0.19	0.35	-0.616531	0.055755	0.924795
ENSG00000263001	GTF2I	7	74657667	74760692	+	10438	protein_coding	general transcription factor IIi [Source:HGNC Symbol;Acc:HGNC:4659]	GTF2I	3.36	2.7	0.339344	0.0557642	0.924795
ENSG00000213214	ARHGEF35	7	144186083	144195655	-	2431	protein_coding	Rho guanine nucleotide exchange factor 35 [Source:HGNC Symbol;Acc:HGNC:33846]	-	0.1	0.27	-0.697851	0.0557993	NA
ENSG00000131018	SYNE1	6	152121684	152637801	-	46064	protein_coding	spectrin repeat containing nuclear envelope protein 1 [Source:HGNC Symbol;Acc:HGNC:17089]	-	4.27	5.92	-0.399633	0.0558254	0.924795
ENSG00000099889	ARVCF	22	19969896	20016808	-	5621	protein_coding	ARVCF, delta catenin family member [Source:HGNC Symbol;Acc:HGNC:728]	-	1.13	1.72	-0.479351	0.0559608	0.925098
ENSG00000013563	DNASE1L1	X	154401238	154412112	-	4130	protein_coding	deoxyribonuclease 1 like 1 [Source:HGNC Symbol;Acc:HGNC:2957]	-	0.99	0.69	0.472249	0.0559683	0.925098
ENSG00000227790	SPECC1P1	17	15829369	15908632	+	1446	transcribed_unprocessed_pseudogene	SPECC1 pseudogene 1 [Source:HGNC Symbol;Acc:HGNC:53867]	-	0.09	0	0.506023	0.0561115	NA
ENSG00000135540	NHSL1	6	138422043	138692571	-	8741	protein_coding	NHS like 1 [Source:HGNC Symbol;Acc:HGNC:21021]	-	0.19	0.11	0.572026	0.0561625	0.927275
ENSG00000114861	FOXP1	3	70952817	71583993	-	36714	protein_coding	forkhead box P1 [Source:HGNC Symbol;Acc:HGNC:3823]	Fork	0.86	1.12	-0.320996	0.0564895	0.928468
ENSG00000152284	TCF7L1	2	85133410	85310388	+	4414	protein_coding	transcription factor 7 like 1 [Source:HGNC Symbol;Acc:HGNC:11640]	HMG	0.5	0.81	-0.536879	0.0564974	0.928468
ENSG00000126878	AIF1L	9	131096476	131123152	+	5299	protein_coding	allograft inflammatory factor 1 like [Source:HGNC Symbol;Acc:HGNC:28904]	-	0.01	0.05	-0.664883	0.0565129	NA
ENSG00000120889	TNFRSF10B	8	23020133	23069179	-	5158	protein_coding	TNF receptor superfamily member 10b [Source:HGNC Symbol;Acc:HGNC:11905]	-	19.07	15.72	0.303864	0.0566423	0.928468
ENSG00000211598	IGKV4-1	2	88885397	88886153	+	538	IG_V_gene	immunoglobulin kappa variable 4-1 [Source:HGNC Symbol;Acc:HGNC:5834]	-	57.94	36.31	0.564559	0.0566526	0.928468
ENSG00000213373	LINC00671	17	42874670	42898704	-	2167	lincRNA	long intergenic non-protein coding RNA 671 [Source:HGNC Symbol;Acc:HGNC:44339]	-	1.43	1.01	0.477785	0.0566786	0.928468
ENSG00000147488	ST18	8	52110839	52460959	-	14396	protein_coding	ST18, C2H2C-type zinc finger [Source:HGNC Symbol;Acc:HGNC:18695]	zf-C2HC	0.2	0.29	-0.443095	0.0566951	0.928468
ENSG00000214300	SPDYE3	7	100307702	100322196	+	4131	protein_coding	speedy/RINGO cell cycle regulator family member E3 [Source:HGNC Symbol;Acc:HGNC:35462]	-	1.38	1.9	-0.382378	0.0567296	0.928468
ENSG00000170906	NDUFA3	19	54102728	54109257	+	2475	protein_coding	NADH:ubiquinone oxidoreductase subunit A3 [Source:HGNC Symbol;Acc:HGNC:7686]	-	5.4	6.99	-0.316579	0.0567352	0.928468
ENSG00000153291	SLC25A27	6	46652915	46678193	+	3288	protein_coding	solute carrier family 25 member 27 [Source:HGNC Symbol;Acc:HGNC:21065]	-	0.15	0.05	0.693913	0.0567837	NA
ENSG00000110911	SLC11A2	12	50979401	51028566	-	10145	protein_coding	solute carrier family 11 member 2 [Source:HGNC Symbol;Acc:HGNC:10908]	-	2.81	2.4	0.259143	0.057312	0.936875
ENSG00000169402	RSPH10B2	7	6754109	6799365	+	4992	protein_coding	radial spoke head 10 homolog B2 [Source:HGNC Symbol;Acc:HGNC:34385]	-	0.05	0.12	-0.689664	0.0573794	NA
ENSG00000181982	CCDC149	4	24806117	24980204	-	9582	protein_coding	coiled-coil domain containing 149 [Source:HGNC Symbol;Acc:HGNC:25405]	-	2.01	1.44	0.460782	0.0573957	0.93721
ENSG00000187994	RINL	19	38867834	38878279	-	4201	protein_coding	Ras and Rab interactor like [Source:HGNC Symbol;Acc:HGNC:24795]	-	6.73	8.28	-0.250578	0.0574608	0.937242
ENSG00000240682	ISY1	3	129127415	129161293	-	4102	protein_coding	ISY1 splicing factor homolog [Source:HGNC Symbol;Acc:HGNC:29201]	-	0.07	0.02	0.665316	0.057492	NA
ENSG00000100092	SH3BP1	22	37634654	37656119	+	4892	protein_coding	SH3 domain binding protein 1 [Source:HGNC Symbol;Acc:HGNC:10824]	-	1.85	1.38	0.416977	0.0577304	0.939517
ENSG00000124635	HIST1H2BJ	6	27125897	27132750	-	950	protein_coding	histone cluster 1 H2B family member j [Source:HGNC Symbol;Acc:HGNC:4761]	-	6.19	9.41	-0.478543	0.0577757	0.939517
ENSG00000158050	DUSP2	2	96143166	96145440	-	1932	protein_coding	dual specificity phosphatase 2 [Source:HGNC Symbol;Acc:HGNC:3068]	-	6.33	10.87	-0.577666	0.0578483	0.939517
ENSG00000159176	CSRP1	1	201483530	201509456	-	10318	protein_coding	cysteine and glycine rich protein 1 [Source:HGNC Symbol;Acc:HGNC:2469]	-	3.17	4.02	-0.288375	0.0578981	0.939517
ENSG00000168746	LINC01620	20	44436172	44465349	-	1719	lincRNA	long intergenic non-protein coding RNA 1620 [Source:HGNC Symbol;Acc:HGNC:16195]	-	0.39	0.89	-0.681757	0.0579167	0.939517
ENSG00000044459	CNTLN	9	17134982	17503923	+	11064	protein_coding	centlein [Source:HGNC Symbol;Acc:HGNC:23432]	-	0.46	0.35	0.411771	0.058074	0.940451
ENSG00000134058	CDK7	5	69234795	69277430	+	2416	protein_coding	cyclin dependent kinase 7 [Source:HGNC Symbol;Acc:HGNC:1778]	-	9.96	8.33	0.288519	0.0581443	0.940451
ENSG00000285901	AC008012.1	12	4273762	4405490	+	3435	protein_coding	novel transcript	-	2.08	1.55	0.422664	0.0581644	0.940451
ENSG00000197912	SPG7	16	89490719	89557768	+	36008	protein_coding	SPG7, paraplegin matrix AAA peptidase subunit [Source:HGNC Symbol;Acc:HGNC:11237]	-	3.45	3.02	0.229787	0.0584831	0.944015
ENSG00000267270	PARD6G-AS1	18	80147924	80178432	+	4589	antisense	PARD6G antisense RNA 1 [Source:HGNC Symbol;Acc:HGNC:44109]	-	0.25	0.47	-0.624221	0.0585448	0.944015
ENSG00000110442	COMMD9	11	36269284	36289449	-	6592	protein_coding	COMM domain containing 9 [Source:HGNC Symbol;Acc:HGNC:25014]	-	4.63	3.8	0.305973	0.0586267	0.944015
ENSG00000082397	EPB41L3	18	5392381	5630700	-	12203	protein_coding	erythrocyte membrane protein band 4.1 like 3 [Source:HGNC Symbol;Acc:HGNC:3380]	-	1.92	1.63	0.264038	0.0587074	0.944015
ENSG00000143793	C1orf35	1	228100726	228105411	-	4308	protein_coding	chromosome 1 open reading frame 35 [Source:HGNC Symbol;Acc:HGNC:19032]	-	4.06	3.36	0.303087	0.0587211	0.944015
ENSG00000187953	PMS2CL	7	6710128	6753862	+	3879	transcribed_unprocessed_pseudogene	PMS2 C-terminal like pseudogene [Source:HGNC Symbol;Acc:HGNC:30061]	-	3.38	4.29	-0.289186	0.0587664	0.944015
ENSG00000178826	TMEM139	7	143279957	143288048	+	2564	protein_coding	transmembrane protein 139 [Source:HGNC Symbol;Acc:HGNC:22058]	-	0.06	0	0.539093	0.0587807	NA
ENSG00000102316	MAGED2	X	54807599	54816012	+	2940	protein_coding	MAGE family member D2 [Source:HGNC Symbol;Acc:HGNC:16353]	-	13.08	16.85	-0.31029	0.0590598	0.947018
ENSG00000141505	ASGR1	17	7173431	7179564	-	3748	protein_coding	asialoglycoprotein receptor 1 [Source:HGNC Symbol;Acc:HGNC:742]	-	3.14	2.13	0.500443	0.0590809	0.947018
ENSG00000148572	NRBF2	10	63133247	63155031	+	1901	protein_coding	nuclear receptor binding factor 2 [Source:HGNC Symbol;Acc:HGNC:19692]	-	62.21	82.21	-0.333615	0.0592479	0.947933
ENSG00000167671	UBXN6	19	4444999	4457822	-	5275	protein_coding	UBX domain protein 6 [Source:HGNC Symbol;Acc:HGNC:14928]	-	44.97	33.13	0.42	0.0593556	0.947933
ENSG00000182648	LINC01006	7	156472196	156640654	-	3964	lincRNA	long intergenic non-protein coding RNA 1006 [Source:HGNC Symbol;Acc:HGNC:48971]	-	0.82	0.43	0.644027	0.059392	0.947933
ENSG00000187624	C17orf97	17	410327	431062	+	2710	protein_coding	chromosome 17 open reading frame 97 [Source:HGNC Symbol;Acc:HGNC:33800]	-	0.41	0.17	0.687749	0.0594006	0.947933
ENSG00000151491	EPS8	12	15620158	15882329	-	8692	protein_coding	epidermal growth factor receptor pathway substrate 8 [Source:HGNC Symbol;Acc:HGNC:3420]	-	0.36	0.64	-0.585733	0.0594573	0.947933
ENSG00000125675	GRIA3	X	123184153	123490915	+	6484	protein_coding	glutamate ionotropic receptor AMPA type subunit 3 [Source:HGNC Symbol;Acc:HGNC:4573]	-	0.03	0.08	-0.689042	0.0596758	NA
ENSG00000112378	PERP	6	138088505	138107511	-	4290	protein_coding	PERP, TP53 apoptosis effector [Source:HGNC Symbol;Acc:HGNC:17637]	-	0.69	1.03	-0.467427	0.0599544	0.952209
ENSG00000123838	C4BPA	1	207104262	207144972	+	2441	protein_coding	complement component 4 binding protein alpha [Source:HGNC Symbol;Acc:HGNC:1325]	-	0.39	0.81	-0.654342	0.0600706	0.952209
ENSG00000285802	AL450043.1	1	23576436	23593621	-	1322	lincRNA	novel transcript	-	0	0.1	-0.488648	0.0601177	NA
ENSG00000018625	ATP1A2	1	160115759	160143591	+	6298	protein_coding	ATPase Na+/K+ transporting subunit alpha 2 [Source:HGNC Symbol;Acc:HGNC:800]	-	0	0.02	-0.488648	0.0601177	NA
ENSG00000281189	GHET1	7	148987527	148989432	+	1906	lincRNA	gastric carcinoma proliferation enhancing transcript 1 [Source:HGNC Symbol;Acc:HGNC:49425]	-	0	0.07	-0.488648	0.0601177	NA
ENSG00000165140	FBP1	9	94603133	94640249	-	1739	protein_coding	fructose-bisphosphatase 1 [Source:HGNC Symbol;Acc:HGNC:3606]	-	11.03	8.63	0.359528	0.0601818	0.952209
ENSG00000169752	NRG4	15	75935969	76059795	-	5031	protein_coding	neuregulin 4 [Source:HGNC Symbol;Acc:HGNC:29862]	-	0.06	0.02	0.668979	0.0601929	NA
ENSG00000170264	FAM161A	2	61824854	61854143	-	5252	protein_coding	FAM161A, centrosomal protein [Source:HGNC Symbol;Acc:HGNC:25808]	-	0.22	0.36	-0.543537	0.0602174	0.952209
ENSG00000244273	PGBD4P1	7	142722358	142722764	+	407	processed_pseudogene	piggyBac transposable element derived 4 pseudogene 1 [Source:HGNC Symbol;Acc:HGNC:44066]	-	0.77	1.86	-0.683748	0.0602201	0.952209
ENSG00000259642	ST20-AS1	15	79922771	79926993	+	4223	antisense	ST20 antisense RNA 1 [Source:HGNC Symbol;Acc:HGNC:27521]	-	1.33	0.98	0.428556	0.0602985	0.952209
ENSG00000172071	EIF2AK3	2	88556741	88627576	-	5434	protein_coding	eukaryotic translation initiation factor 2 alpha kinase 3 [Source:HGNC Symbol;Acc:HGNC:3255]	-	1.98	2.53	-0.294251	0.0603527	0.952209
ENSG00000226377	AC084809.1	17	32876759	32878637	+	591	antisense	novel transcript	-	0.22	0	0.492471	0.0604097	NA
ENSG00000134256	CD101	1	117001750	117036476	+	3828	protein_coding	CD101 molecule [Source:HGNC Symbol;Acc:HGNC:5949]	-	3.63	4.92	-0.374251	0.0604145	0.952209
ENSG00000174527	MYO1H	12	109347903	109455523	+	4792	protein_coding	myosin IH [Source:HGNC Symbol;Acc:HGNC:13879]	-	0.01	0.05	-0.62577	0.0604332	NA
ENSG00000186407	CD300E	17	74609887	74623738	-	3752	protein_coding	CD300e molecule [Source:HGNC Symbol;Acc:HGNC:28874]	-	42.05	36.71	0.230733	0.0605963	0.952209
ENSG00000179104	TMTC2	12	82686880	83134870	+	8323	protein_coding	transmembrane and tetratricopeptide repeat containing 2 [Source:HGNC Symbol;Acc:HGNC:25440]	-	1.57	1.09	0.478164	0.0606172	0.952209
ENSG00000228852	AC092802.2	1	95243167	95278940	-	1418	antisense	novel transcript, antisense to RWDD3	-	1.12	0.65	0.608487	0.0606945	0.952209
ENSG00000100314	CABP7	22	29720084	29731839	+	3259	protein_coding	calcium binding protein 7 [Source:HGNC Symbol;Acc:HGNC:20834]	-	0.09	0.02	0.65153	0.0608476	NA
ENSG00000151665	PIGF	2	46580937	46617119	-	4978	protein_coding	phosphatidylinositol glycan anchor biosynthesis class F [Source:HGNC Symbol;Acc:HGNC:8962]	-	6.87	5.89	0.252929	0.0608492	0.952209
ENSG00000099864	PALM	19	708939	748329	+	4908	protein_coding	paralemmin [Source:HGNC Symbol;Acc:HGNC:8594]	-	0.1	0.25	-0.685201	0.0609488	0.952209
ENSG00000218819	TDRD15	2	21123917	21143272	+	6135	protein_coding	tudor domain containing 15 [Source:HGNC Symbol;Acc:HGNC:45037]	-	0.03	0	0.550984	0.0609567	NA
ENSG00000269946	AL158152.2	9	94166289	94200627	+	235	lincRNA	novel transcript	-	4.15	1.85	0.680555	0.0609589	0.952209
ENSG00000110002	VWA5A	11	124115362	124147721	+	6403	protein_coding	von Willebrand factor A domain containing 5A [Source:HGNC Symbol;Acc:HGNC:6658]	-	1.21	1.57	-0.321065	0.0609641	0.952209
ENSG00000229390	MICD	6	29970801	29972464	-	813	unprocessed_pseudogene	MHC class I polypeptide-related sequence D (pseudogene) [Source:HGNC Symbol;Acc:HGNC:7093]	-	15.48	2.62	0.596632	0.060991	0.952209
ENSG00000171169	NAIF1	9	128061233	128068206	-	3621	protein_coding	nuclear apoptosis inducing factor 1 [Source:HGNC Symbol;Acc:HGNC:25446]	-	3.98	5.01	-0.277938	0.0610208	0.952209
ENSG00000082014	SMARCD3	7	151238764	151277896	-	5198	protein_coding	SWI/SNF related, matrix associated, actin dependent regulator of chromatin, subfamily d, member 3 [Source:HGNC Symbol;Acc:HGNC:11108]	-	5.72	4.43	0.379601	0.0610775	0.952209
ENSG00000235419	AC010149.1	2	230520594	230580006	-	692	antisense	novel transcript, antisense to SP100	-	45.35	56.44	-0.266337	0.0610885	0.952209
ENSG00000264522	OTUD7B	1	149937812	150010676	-	12177	protein_coding	OTU deubiquitinase 7B [Source:HGNC Symbol;Acc:HGNC:16683]	-	0.59	0.84	-0.421411	0.061147	0.952209
ENSG00000181215	C4orf50	4	5897373	6200555	-	20673	protein_coding	chromosome 4 open reading frame 50 [Source:HGNC Symbol;Acc:HGNC:33766]	-	0.09	0.17	-0.609583	0.0612106	0.952209
ENSG00000135119	RNFT2	12	116738178	116853631	+	6487	protein_coding	ring finger protein, transmembrane 2 [Source:HGNC Symbol;Acc:HGNC:25905]	-	0.33	0.5	-0.459045	0.0613206	0.952209
ENSG00000156026	MCU	10	72692131	72887694	+	4533	protein_coding	mitochondrial calcium uniporter [Source:HGNC Symbol;Acc:HGNC:23526]	-	5.3	6.64	-0.269443	0.0613411	0.952209
ENSG00000129673	AANAT	17	76453351	76470117	+	2190	protein_coding	aralkylamine N-acetyltransferase [Source:HGNC Symbol;Acc:HGNC:19]	-	2.26	1.5	0.515339	0.0613525	0.952209
ENSG00000184428	TOP1MT	8	143304384	143359979	-	6441	protein_coding	DNA topoisomerase I mitochondrial [Source:HGNC Symbol;Acc:HGNC:29787]	-	3.29	2.78	0.273037	0.0613634	0.952209
ENSG00000059588	TARBP1	1	234391313	234479103	-	7743	protein_coding	TAR (HIV-1) RNA binding protein 1 [Source:HGNC Symbol;Acc:HGNC:11568]	-	6.29	4.95	0.362156	0.0614229	0.952209
ENSG00000184678	HIST2H2BE	1	149884459	149886652	-	2194	protein_coding	histone cluster 2 H2B family member e [Source:HGNC Symbol;Acc:HGNC:4760]	-	16.2	25.74	-0.507414	0.0614577	0.952209
ENSG00000100721	TCL1A	14	95709967	95714196	-	2236	protein_coding	T cell leukemia/lymphoma 1A [Source:HGNC Symbol;Acc:HGNC:11648]	-	5.68	8.65	-0.481207	0.0615996	0.953412
ENSG00000156804	FBXO32	8	123497889	123541206	-	7395	protein_coding	F-box protein 32 [Source:HGNC Symbol;Acc:HGNC:16731]	-	1.88	2.78	-0.455164	0.0617522	0.954779
ENSG00000181218	HIST3H2A	1	228456979	228457873	-	895	protein_coding	histone cluster 3 H2A [Source:HGNC Symbol;Acc:HGNC:20507]	-	2.14	3.4	-0.525103	0.0618479	0.955263
ENSG00000005022	SLC25A5	X	119468400	119471319	+	1500	protein_coding	solute carrier family 25 member 5 [Source:HGNC Symbol;Acc:HGNC:10991]	-	53.09	46.54	0.224686	0.0620461	0.955706
ENSG00000161031	PGLYRP2	19	15468645	15498956	-	3188	protein_coding	peptidoglycan recognition protein 2 [Source:HGNC Symbol;Acc:HGNC:30013]	-	0.1	0.25	-0.679875	0.0620644	0.955706
ENSG00000183615	FAM167B	1	32247233	32248856	+	936	protein_coding	family with sequence similarity 167 member B [Source:HGNC Symbol;Acc:HGNC:28133]	-	0.29	0.8	-0.682647	0.0620697	0.955706
ENSG00000115649	CNPPD1	2	219171897	219178106	-	2760	protein_coding	cyclin Pas1/PHO80 domain containing 1 [Source:HGNC Symbol;Acc:HGNC:25220]	-	30.25	36.49	-0.223815	0.0621574	0.956064
ENSG00000228863	AL121985.1	1	160670778	160699761	+	4121	antisense	novel transcript, antisense to CD48	-	0.66	0.45	0.509512	0.0624398	0.959415
ENSG00000156509	FBXO43	8	100133360	100145800	-	3950	protein_coding	F-box protein 43 [Source:HGNC Symbol;Acc:HGNC:28521]	-	0.01	0.07	-0.647335	0.062596	NA
ENSG00000197540	GZMM	19	544034	549924	+	945	protein_coding	granzyme M [Source:HGNC Symbol;Acc:HGNC:4712]	-	62.22	92.24	-0.463159	0.0627	0.962357
ENSG00000145416	43891	4	163524298	164384050	-	10421	protein_coding	membrane associated ring-CH-type finger 1 [Source:HGNC Symbol;Acc:HGNC:26077]	-	6.78	5.6	0.299544	0.06279	0.962357
ENSG00000255136	AP001972.3	11	75208054	75241173	-	862	lincRNA	novel transcript	-	0.39	0.1	0.648818	0.0629632	NA
ENSG00000247095	MIR210HG	11	565660	568457	-	2321	lincRNA	MIR210 host gene [Source:HGNC Symbol;Acc:HGNC:39524]	-	0.23	0.1	0.678407	0.0629677	NA
ENSG00000183773	AIFM3	22	20965108	20981360	+	5401	protein_coding	apoptosis inducing factor, mitochondria associated 3 [Source:HGNC Symbol;Acc:HGNC:26398]	-	1.22	0.8	0.533383	0.0630453	0.962357
ENSG00000100439	ABHD4	14	22598237	22613215	+	4070	protein_coding	abhydrolase domain containing 4 [Source:HGNC Symbol;Acc:HGNC:20154]	-	9.5	11.93	-0.27233	0.0630562	0.962357
ENSG00000254488	AC007876.1	Y	21038289	21044724	-	983	lincRNA	novel transcript	-	0.15	0	0.482746	0.0630867	NA
ENSG00000158109	TPRG1L	1	3625002	3630127	+	2414	protein_coding	tumor protein p63 regulated 1 like [Source:HGNC Symbol;Acc:HGNC:27007]	-	27.22	35.21	-0.306352	0.0631238	0.962357
ENSG00000175970	UNC119B	12	120710435	120723640	+	5195	protein_coding	unc-119 lipid binding chaperone B [Source:HGNC Symbol;Acc:HGNC:16488]	-	4.73	3.96	0.285636	0.0631698	0.962357
ENSG00000238035	AC138035.1	5	181306502	181324685	+	1838	lincRNA	novel transcript	-	10.38	8.66	0.286232	0.0631908	0.962357
ENSG00000137522	RNF121	11	71928701	71997597	+	3567	protein_coding	ring finger protein 121 [Source:HGNC Symbol;Acc:HGNC:21070]	-	4.17	3.48	0.288038	0.063241	0.962357
ENSG00000223553	SMPD4P1	22	20602595	20656914	-	3971	transcribed_unprocessed_pseudogene	sphingomyelin phosphodiesterase 4 pseudogene 1 [Source:HGNC Symbol;Acc:HGNC:39673]	-	0.12	0.25	-0.649435	0.0634001	0.962357
ENSG00000188107	EYS	6	63719980	65707225	-	17070	protein_coding	eyes shut homolog (Drosophila) [Source:HGNC Symbol;Acc:HGNC:21555]	-	0.2	0.29	-0.43944	0.0634047	0.962357
ENSG00000186026	ZNF284	19	44072144	44089613	+	4351	protein_coding	zinc finger protein 284 [Source:HGNC Symbol;Acc:HGNC:13078]	zf-C2H2	0.42	0.66	-0.520447	0.0634298	0.962357
ENSG00000124074	ENKD1	16	67662945	67667265	-	2679	protein_coding	enkurin domain containing 1 [Source:HGNC Symbol;Acc:HGNC:25246]	-	3.63	2.74	0.410336	0.0634491	0.962357
ENSG00000182795	C1orf116	1	207018521	207032756	-	5502	protein_coding	chromosome 1 open reading frame 116 [Source:HGNC Symbol;Acc:HGNC:28667]	-	0.31	0.18	0.593828	0.0634749	0.962357
ENSG00000156049	GNA14	9	77423079	77648307	-	2721	protein_coding	G protein subunit alpha 14 [Source:HGNC Symbol;Acc:HGNC:4382]	-	0	0.07	-0.542413	0.0635152	NA
ENSG00000171962	DRC3	17	17972813	18016889	+	7332	protein_coding	dynein regulatory complex subunit 3 [Source:HGNC Symbol;Acc:HGNC:25384]	-	0	0.03	-0.608885	0.0636043	NA
ENSG00000164066	INTU	4	127623271	127726737	+	16066	protein_coding	inturned planar cell polarity protein [Source:HGNC Symbol;Acc:HGNC:29239]	-	0.03	0.01	0.678157	0.0636328	NA
ENSG00000283103	AC010642.2	19	58310449	58326933	-	2413	antisense	novel transcript, antisense to ERVK3-1	-	0.56	0.33	0.585012	0.0636571	0.962357
ENSG00000086967	MYBPC2	19	50432903	50466321	+	3708	protein_coding	myosin binding protein C, fast type [Source:HGNC Symbol;Acc:HGNC:7550]	-	0.05	0.15	-0.671295	0.0636777	NA
ENSG00000130522	JUND	19	18279760	18281622	-	1863	protein_coding	JunD proto-oncogene, AP-1 transcription factor subunit [Source:HGNC Symbol;Acc:HGNC:6206]	TF_bZIP	90.01	115.51	-0.296452	0.0636837	0.962357
ENSG00000214357	NEURL1B	5	172641266	172691540	+	6424	protein_coding	neuralized E3 ubiquitin protein ligase 1B [Source:HGNC Symbol;Acc:HGNC:35422]	-	0.06	0.13	-0.654947	0.0637583	0.962357
ENSG00000206013	IFITM5	11	298200	299526	-	736	protein_coding	interferon induced transmembrane protein 5 [Source:HGNC Symbol;Acc:HGNC:16644]	-	0.65	0.22	0.670314	0.0637829	NA
ENSG00000259887	AC068987.1	12	51848223	51852729	+	427	lincRNA	uncharacterized LOC105369971 [Source:NCBI gene;Acc:105369971]	-	0.06	0.57	-0.550318	0.0638004	NA
ENSG00000117394	SLC2A1	1	42925375	42959176	-	4724	protein_coding	solute carrier family 2 member 1 [Source:HGNC Symbol;Acc:HGNC:11005]	-	9.67	12.39	-0.30473	0.0638049	0.962357
ENSG00000232810	TNF	6	31575567	31578336	+	1676	protein_coding	tumor necrosis factor [Source:HGNC Symbol;Acc:HGNC:11892]	-	5.57	7.33	-0.334057	0.0639198	0.962357
ENSG00000160305	DIP2A	21	46458899	46569852	+	13557	protein_coding	disco interacting protein 2 homolog A [Source:HGNC Symbol;Acc:HGNC:17217]	-	12.19	15.3	-0.271234	0.0640147	0.962357
ENSG00000248027	AP001351.1	11	100684162	100687955	-	1865	antisense	uncharacterized LOC100128386 [Source:NCBI gene;Acc:100128386]	-	0.1	0.01	0.582986	0.0640873	NA
ENSG00000145391	SETD7	4	139495941	139606699	-	13916	protein_coding	SET domain containing lysine methyltransferase 7 [Source:HGNC Symbol;Acc:HGNC:30412]	-	2.24	1.9	0.263096	0.0641542	0.962357
ENSG00000160949	TONSL	8	144428775	144444444	-	7111	protein_coding	tonsoku like, DNA repair protein [Source:HGNC Symbol;Acc:HGNC:7801]	-	1.24	0.97	0.366744	0.0642009	0.962357
ENSG00000250437	LINC02161	5	89581209	89677701	+	420	lincRNA	long intergenic non-protein coding RNA 2161 [Source:HGNC Symbol;Acc:HGNC:53022]	-	0	0.51	-0.473682	0.0642925	NA
ENSG00000136770	DNAJC1	10	21756537	22003769	-	2501	protein_coding	DnaJ heat shock protein family (Hsp40) member C1 [Source:HGNC Symbol;Acc:HGNC:20090]	MYB	7.01	9.91	-0.407757	0.0643197	0.962357
ENSG00000164105	SAP30	4	173369969	173377532	+	1320	protein_coding	Sin3A associated protein 30 [Source:HGNC Symbol;Acc:HGNC:10532]	-	5.11	3.69	0.444839	0.0643578	0.962357
ENSG00000168096	ANKS3	16	4696510	4734378	-	7868	protein_coding	ankyrin repeat and sterile alpha motif domain containing 3 [Source:HGNC Symbol;Acc:HGNC:29422]	-	1.63	1.34	0.304951	0.0644759	0.962357
ENSG00000185800	DMWD	19	45782947	45792802	-	5658	protein_coding	DM1 locus, WD repeat containing [Source:HGNC Symbol;Acc:HGNC:2936]	-	1.9	2.47	-0.309584	0.0646261	0.962357
ENSG00000250075	AC104806.2	4	67417305	67468251	-	2286	lincRNA	uncharacterized LOC101927237 [Source:NCBI gene;Acc:101927237]	-	2.21	2.98	-0.357681	0.0646845	0.962357
ENSG00000197763	TXNRD3	3	126571779	126655155	-	3809	protein_coding	thioredoxin reductase 3 [Source:HGNC Symbol;Acc:HGNC:20667]	-	0.58	0.34	0.60241	0.0646987	0.962357
ENSG00000237991	RPL35P1	1	236981339	236981708	+	370	processed_pseudogene	ribosomal protein L35 pseudogene 1 [Source:HGNC Symbol;Acc:HGNC:36695]	-	1.41	2.9	-0.64365	0.0647182	0.962357
ENSG00000183762	KREMEN1	22	29073078	29168333	+	7977	protein_coding	kringle containing transmembrane protein 1 [Source:HGNC Symbol;Acc:HGNC:17550]	-	4.92	8.08	-0.533217	0.0647392	0.962357
ENSG00000103507	BCKDK	16	31106107	31112791	+	3873	protein_coding	branched chain ketoacid dehydrogenase kinase [Source:HGNC Symbol;Acc:HGNC:16902]	-	13.13	10.28	0.360556	0.0647943	0.962357
ENSG00000172716	SLFN11	17	35350305	35373701	-	5982	protein_coding	schlafen family member 11 [Source:HGNC Symbol;Acc:HGNC:26633]	-	12.38	10.32	0.287108	0.0648101	0.962357
ENSG00000169398	PTK2	8	140657900	141002216	-	13742	protein_coding	protein tyrosine kinase 2 [Source:HGNC Symbol;Acc:HGNC:9611]	-	0.89	1.13	-0.282952	0.0648646	0.962357
ENSG00000103226	NOMO3	16	16232495	16294814	+	8274	protein_coding	NODAL modulator 3 [Source:HGNC Symbol;Acc:HGNC:25242]	-	1.52	0.78	0.648251	0.064877	0.962357
ENSG00000282499	TRBV25-1	7	142670740	142671244	+	381	TR_V_gene	T cell receptor beta variable 25-1 [Source:HGNC Symbol;Acc:HGNC:12205]	-	7.37	2.82	0.675234	0.0648785	0.962357
ENSG00000273736	AC244100.1	17	35963488	35965472	-	407	transcribed_unprocessed_pseudogene	tetratricopeptide repeat, ankyrin repeat and coiled-coil containing 2 (TANC2) pseudogene	-	0.82	2.2	-0.675384	0.0649078	0.962357
ENSG00000266983	AC011444.1	19	5978403	6020363	+	639	antisense	uncharacterized LOC100128568 [Source:NCBI gene;Acc:100128568]	-	2.95	1.89	0.54527	0.065042	0.962357
ENSG00000198363	ASPH	8	61500556	61714640	-	20047	protein_coding	aspartate beta-hydroxylase [Source:HGNC Symbol;Acc:HGNC:757]	-	1.49	1.22	0.309808	0.0650432	0.962357
ENSG00000169026	SLC49A3	4	681829	689441	-	2644	protein_coding	solute carrier family 49 member 3 [Source:HGNC Symbol;Acc:HGNC:26177]	-	5.29	3.84	0.444433	0.0650951	0.962357
ENSG00000224050	AL008723.1	22	32273420	32277186	+	590	lincRNA	novel transcript	-	0.19	0.76	-0.640871	0.0651603	NA
ENSG00000263574	AC125421.1	17	73737854	73756557	+	1140	lincRNA	uncharacterized LOC100134391 [Source:NCBI gene;Acc:100134391]	-	0.14	0.42	-0.670187	0.0651609	NA
ENSG00000270379	HEATR9	17	35854946	35868891	-	2930	protein_coding	HEAT repeat containing 9 [Source:HGNC Symbol;Acc:HGNC:26548]	-	0.14	0.32	-0.670792	0.0651731	0.962551
ENSG00000136205	TNS3	7	47275154	47582558	-	11797	protein_coding	tensin 3 [Source:HGNC Symbol;Acc:HGNC:21616]	-	3.65	3.15	0.243399	0.0652963	0.963092
ENSG00000132205	EMILIN2	18	2847030	2915993	+	6435	protein_coding	elastin microfibril interfacer 2 [Source:HGNC Symbol;Acc:HGNC:19881]	-	21.75	17.21	0.353367	0.0653395	0.963092
ENSG00000254418	SPON1-AS1	11	14262846	14273691	-	240	antisense	SPON1 antisense RNA 1 [Source:HGNC Symbol;Acc:HGNC:53117]	-	2.98	1.28	0.671613	0.0654373	0.963395
ENSG00000169129	AFAP1L2	10	114294824	114404756	-	5789	protein_coding	actin filament associated protein 1 like 2 [Source:HGNC Symbol;Acc:HGNC:25901]	-	0.55	0.9	-0.527325	0.0655213	0.963395
ENSG00000275131	AC241952.1	1	120489860	120701289	-	9444	transcribed_unprocessed_pseudogene	phosphodiesterase 4D interacting protein-like [Source:NCBI gene;Acc:100996724]	-	1.87	2.49	-0.348696	0.0656415	0.963395
ENSG00000220785	MTMR9LP	1	32231658	32241620	-	2961	transcribed_unprocessed_pseudogene	myotubularin related protein 9-like, pseudogene [Source:HGNC Symbol;Acc:HGNC:27920]	-	0.43	0.8	-0.607227	0.0657209	0.963395
ENSG00000167470	MIDN	19	1248553	1259140	+	4492	protein_coding	midnolin [Source:HGNC Symbol;Acc:HGNC:16298]	-	64.51	80.12	-0.257315	0.0658296	0.963395
ENSG00000172590	MRPL52	14	22829879	22835037	+	3213	protein_coding	mitochondrial ribosomal protein L52 [Source:HGNC Symbol;Acc:HGNC:16655]	-	7.76	6.64	0.254933	0.0659723	0.963395
ENSG00000164342	TLR3	4	186069152	186088069	+	6724	protein_coding	toll like receptor 3 [Source:HGNC Symbol;Acc:HGNC:11849]	-	0.33	0.5	-0.456319	0.0659949	0.963395
ENSG00000130985	UBA1	X	47190861	47215128	+	6437	protein_coding	ubiquitin like modifier activating enzyme 1 [Source:HGNC Symbol;Acc:HGNC:12469]	-	50.4	62.86	-0.263396	0.0660587	0.963395
ENSG00000184867	ARMCX2	X	101655281	101659891	-	3589	protein_coding	armadillo repeat containing X-linked 2 [Source:HGNC Symbol;Acc:HGNC:16869]	-	1.02	0.68	0.515713	0.0660592	0.963395
ENSG00000012211	PRICKLE3	X	49175264	49186528	-	3194	protein_coding	prickle planar cell polarity protein 3 [Source:HGNC Symbol;Acc:HGNC:6645]	-	3.88	3.2	0.3031	0.0660613	0.963395
ENSG00000134982	APC	5	112707498	112846239	+	12440	protein_coding	APC, WNT signaling pathway regulator [Source:HGNC Symbol;Acc:HGNC:583]	-	0.88	0.69	0.354512	0.066074	0.963395
ENSG00000253618	GRPEL2-AS1	5	149348116	149357642	-	401	antisense	GRPEL2 antisense RNA 1 [Source:HGNC Symbol;Acc:HGNC:48999]	-	0.45	0.04	0.539083	0.0663865	NA
ENSG00000075826	SEC31B	10	100486642	100519864	-	7938	protein_coding	SEC31 homolog B, COPII coat complex component [Source:HGNC Symbol;Acc:HGNC:23197]	-	4.27	3.69	0.243547	0.0664455	0.96695
ENSG00000228232	GAPDHP1	X	39787132	39788136	-	1005	processed_pseudogene	glyceraldehyde-3-phosphate dehydrogenase pseudogene 1 [Source:HGNC Symbol;Acc:HGNC:4159]	-	3.62	2.39	0.517926	0.0664481	0.96695
ENSG00000250765	AC138035.2	5	181329241	181342213	+	727	lincRNA	novel transcript	-	0.74	1.59	-0.65169	0.0666871	0.969444
ENSG00000005102	MEOX1	17	43640388	43661954	-	2707	protein_coding	mesenchyme homeobox 1 [Source:HGNC Symbol;Acc:HGNC:7013]	Homeobox	0.29	0.52	-0.594319	0.0668045	0.969444
ENSG00000112053	SLC26A8	6	35943514	36024868	-	6036	protein_coding	solute carrier family 26 member 8 [Source:HGNC Symbol;Acc:HGNC:14468]	-	2.39	3.12	-0.32429	0.0669472	0.969444
ENSG00000253853	AC246817.1	8	2727318	2822482	+	610	lincRNA	novel transcript	-	0.05	0.45	-0.555102	0.0669646	NA
ENSG00000204149	AGAP6	10	49982190	50010499	+	3160	protein_coding	ArfGAP with GTPase domain, ankyrin repeat and PH domain 6 [Source:HGNC Symbol;Acc:HGNC:23466]	-	5.91	4.98	0.276308	0.0670472	0.969444
ENSG00000151689	INPP1	2	190343470	190371665	+	3676	protein_coding	inositol polyphosphate-1-phosphatase [Source:HGNC Symbol;Acc:HGNC:6071]	-	4.28	3.29	0.376	0.0670558	0.969444
ENSG00000175894	TSPEAR	21	44497892	44711580	-	4471	protein_coding	thrombospondin type laminin G domain and EAR repeats [Source:HGNC Symbol;Acc:HGNC:1268]	-	1.11	1.69	-0.471403	0.0670706	0.969444
ENSG00000234282	AL109809.2	20	1722045	1722537	-	493	unprocessed_pseudogene	pseudogene similar to part of PTPNS (protein tyrosine phosphatase, non-receptor type substrate) family	-	0.65	1.72	-0.670007	0.0670766	0.969444
ENSG00000139350	NEDD1	12	96907223	96953777	+	4463	protein_coding	neural precursor cell expressed, developmentally down-regulated 1 [Source:HGNC Symbol;Acc:HGNC:7723]	-	4.76	5.97	-0.273064	0.0672155	0.970325
ENSG00000164330	EBF1	5	158695916	159099761	-	6178	protein_coding	early B cell factor 1 [Source:HGNC Symbol;Acc:HGNC:3126]	COE	1.03	1.42	-0.380294	0.0672684	0.970325
ENSG00000197536	C5orf56	5	132410636	132488702	+	9728	processed_transcript	chromosome 5 open reading frame 56 [Source:HGNC Symbol;Acc:HGNC:33838]	-	0.03	0.01	0.653594	0.0673862	NA
ENSG00000216775	AL109918.1	6	52664366	52669155	+	3821	transcribed_unprocessed_pseudogene	uncharacterized LOC730101 [Source:NCBI gene;Acc:730101]	-	0.04	0.13	-0.66672	0.0676253	NA
ENSG00000224976	PARP4P2	13	19349137	19407962	+	3326	unprocessed_pseudogene	poly(ADP-ribose) polymerase family member 4 pseudogene 2 [Source:HGNC Symbol;Acc:HGNC:37760]	-	0.1	0.02	0.627388	0.0677129	NA
ENSG00000013725	CD6	11	60971680	61020377	+	5958	protein_coding	CD6 molecule [Source:HGNC Symbol;Acc:HGNC:1691]	-	29.65	36.92	-0.263544	0.0677197	0.974315
ENSG00000141431	ASXL3	18	33578233	33751192	+	13619	protein_coding	ASXL transcriptional regulator 3 [Source:HGNC Symbol;Acc:HGNC:29357]	-	0	0.01	-0.542206	0.0678171	NA
ENSG00000112303	VNN2	6	132743870	132763459	-	2633	protein_coding	vanin 2 [Source:HGNC Symbol;Acc:HGNC:12706]	-	231.87	329.94	-0.407106	0.0679143	0.974315
ENSG00000183527	PSMG1	21	39174769	39183851	-	2515	protein_coding	proteasome assembly chaperone 1 [Source:HGNC Symbol;Acc:HGNC:3043]	-	3.43	2.7	0.353121	0.067987	0.974315
ENSG00000181104	F2R	5	76716043	76735781	+	4066	protein_coding	coagulation factor II thrombin receptor [Source:HGNC Symbol;Acc:HGNC:3537]	-	6.92	11.18	-0.526658	0.0680288	0.974315
ENSG00000155592	ZKSCAN2	16	25236001	25257931	-	7970	protein_coding	zinc finger with KRAB and SCAN domains 2 [Source:HGNC Symbol;Acc:HGNC:25677]	zf-C2H2	0.62	0.48	0.383085	0.0680296	0.974315
ENSG00000129355	CDKN2D	19	10566462	10569059	-	1503	protein_coding	cyclin dependent kinase inhibitor 2D [Source:HGNC Symbol;Acc:HGNC:1790]	-	71.21	90.38	-0.283101	0.0680347	0.974315
ENSG00000144029	MRPS5	2	95087207	95149434	-	6719	protein_coding	mitochondrial ribosomal protein S5 [Source:HGNC Symbol;Acc:HGNC:14498]	-	7.24	6.31	0.229894	0.0680908	0.974315
ENSG00000274810	NPHP3-ACAD11	3	132558142	132722459	-	7789	protein_coding	NPHP3-ACAD11 readthrough (NMD candidate) [Source:HGNC Symbol;Acc:HGNC:48351]	-	0.11	0.19	-0.565518	0.0681346	0.974315
ENSG00000141665	FBXO15	18	74073353	74147865	-	6245	protein_coding	F-box protein 15 [Source:HGNC Symbol;Acc:HGNC:13617]	-	0.13	0.06	0.66153	0.0681661	0.974315
ENSG00000260778	AC009065.4	16	2268155	2273418	+	980	lincRNA	uncharacterized LOC106660606 [Source:NCBI gene;Acc:106660606]	-	4.37	3.23	0.425587	0.0682849	0.974315
ENSG00000145687	SSBP2	5	81413021	81751797	-	11284	protein_coding	single stranded DNA binding protein 2 [Source:HGNC Symbol;Acc:HGNC:15831]	-	2.98	2.58	0.243095	0.0682996	0.974315
ENSG00000170525	PFKFB3	10	6144934	6254644	+	6114	protein_coding	6-phosphofructo-2-kinase/fructose-2,6-biphosphatase 3 [Source:HGNC Symbol;Acc:HGNC:8874]	-	16.42	22.14	-0.356852	0.0683327	0.974315
ENSG00000073905	VDAC1P1	X	80929500	80930347	+	848	processed_pseudogene	voltage dependent anion channel 1 pseudogene 1 [Source:HGNC Symbol;Acc:HGNC:12671]	-	0.97	0.5	0.639683	0.0684474	0.974774
ENSG00000180071	ANKRD18A	9	38571358	38620660	-	5303	protein_coding	ankyrin repeat domain 18A [Source:HGNC Symbol;Acc:HGNC:23643]	-	0.05	0.13	-0.661736	0.0684962	0.974774
ENSG00000225210	DUXAP9	14	19062316	19131167	+	4846	transcribed_processed_pseudogene	double homeobox A pseudogene 9 [Source:HGNC Symbol;Acc:HGNC:32188]	-	0.05	0.16	-0.662781	0.0685924	0.975208
ENSG00000243797	AC004917.1	7	106372251	106770207	-	2082	sense_overlapping	novel transcript, sense overlapping CCDC71L	-	10.2	12.72	-0.263826	0.0688858	0.977494
ENSG00000154162	CDH12	5	21750673	22853622	-	5928	protein_coding	cadherin 12 [Source:HGNC Symbol;Acc:HGNC:1751]	-	0.04	0.01	0.614511	0.0689051	NA
ENSG00000259097	AL163932.1	14	98068240	98205143	-	542	lincRNA	novel transcript	-	10.38	8.07	0.372116	0.0689374	0.977494
ENSG00000116679	IVNS1ABP	1	185296388	185317329	-	7929	protein_coding	influenza virus NS1A binding protein [Source:HGNC Symbol;Acc:HGNC:16951]	-	25.96	31.69	-0.236284	0.0689507	0.977494
ENSG00000138160	KIF11	10	92593286	92655395	+	4860	protein_coding	kinesin family member 11 [Source:HGNC Symbol;Acc:HGNC:6388]	-	0.88	1.26	-0.43066	0.0692296	0.977951
ENSG00000173295	FAM86B3P	8	8228595	8244865	+	4870	transcribed_unprocessed_pseudogene	family with sequence similarity 86 member B3, pseudogene [Source:HGNC Symbol;Acc:HGNC:44371]	-	2.16	3.19	-0.446524	0.0692404	0.977951
ENSG00000147434	CHRNA6	8	42752620	42796392	-	2596	protein_coding	cholinergic receptor nicotinic alpha 6 subunit [Source:HGNC Symbol;Acc:HGNC:15963]	-	0.12	0.01	0.549858	0.0692583	NA
ENSG00000110876	SELPLG	12	108622277	108633959	-	2494	protein_coding	selectin P ligand [Source:HGNC Symbol;Acc:HGNC:10722]	-	211.34	261.93	-0.25394	0.069269	0.977951
ENSG00000276600	RAB7B	1	205976740	206003461	-	3686	protein_coding	RAB7B, member RAS oncogene family [Source:HGNC Symbol;Acc:HGNC:30513]	-	0.24	0.11	0.657666	0.0692963	0.977951
ENSG00000166681	BEX3	X	103376340	103378077	+	1080	protein_coding	brain expressed X-linked 3 [Source:HGNC Symbol;Acc:HGNC:13388]	-	8.93	12.42	-0.389202	0.0693124	0.977951
ENSG00000083750	RRAGB	X	55717739	55758774	+	2725	protein_coding	Ras related GTP binding B [Source:HGNC Symbol;Acc:HGNC:19901]	-	4.72	3.76	0.340219	0.0694088	0.978381
ENSG00000232807	AL137186.2	10	5934270	5945900	-	3912	antisense	uncharacterized LOC105376384 [Source:NCBI gene;Acc:105376384]	-	0.14	0.06	0.662357	0.0694447	NA
ENSG00000176788	BASP1	5	17065598	17276843	+	2217	protein_coding	brain abundant membrane attached signal protein 1 [Source:HGNC Symbol;Acc:HGNC:957]	-	161.8	224.88	-0.384486	0.0694784	0.978432
ENSG00000266877	AC007923.4	17	31583162	31637543	+	568	lincRNA	novel transcript	-	0.63	0.08	0.557629	0.0694932	NA
ENSG00000171611	PTCRA	6	42915989	42925835	+	1168	protein_coding	pre T cell antigen receptor alpha [Source:HGNC Symbol;Acc:HGNC:21290]	-	9.89	13.94	-0.406838	0.0696855	0.979538
ENSG00000223509	AC135983.2	15	32519848	32536926	-	2846	transcribed_processed_pseudogene	WAS protein homolog associated with actin, golgi membranes and microtubules (WHAMM) pseudogene	-	12.69	10.93	0.247279	0.0696889	0.979538
ENSG00000181744	C3orf58	3	143971798	144048719	+	5487	protein_coding	chromosome 3 open reading frame 58 [Source:HGNC Symbol;Acc:HGNC:28490]	-	5.57	4.8	0.248521	0.0701529	0.981863
ENSG00000158089	GALNT14	2	30910467	31155202	-	4567	protein_coding	polypeptide N-acetylgalactosaminyltransferase 14 [Source:HGNC Symbol;Acc:HGNC:22946]	-	0.95	1.34	-0.413651	0.0701556	0.981863
ENSG00000225177	FLJ46906	6	138692548	138697288	+	1220	antisense	uncharacterized LOC441172 [Source:NCBI gene;Acc:441172]	-	1.7	1.08	0.548496	0.0702153	0.981863
ENSG00000142621	FHAD1	1	15247272	15400283	+	12805	protein_coding	forkhead associated phosphopeptide binding domain 1 [Source:HGNC Symbol;Acc:HGNC:29408]	-	0.09	0.15	-0.548899	0.0702451	0.981863
ENSG00000020633	RUNX3	1	24899511	24965121	-	4523	protein_coding	runt related transcription factor 3 [Source:HGNC Symbol;Acc:HGNC:10473]	Runt	45.81	60.89	-0.346956	0.0702461	0.981863
ENSG00000198912	C1orf174	1	3889125	3900293	-	4388	protein_coding	chromosome 1 open reading frame 174 [Source:HGNC Symbol;Acc:HGNC:27915]	-	5.84	7.43	-0.296382	0.0703419	0.981863
ENSG00000211797	TRAV17	14	21997539	21998168	+	484	TR_V_gene	T cell receptor alpha variable 17 [Source:HGNC Symbol;Acc:HGNC:12113]	-	4.82	7.41	-0.48978	0.0703732	0.981863
ENSG00000104447	TRPS1	8	115408496	115809673	-	11072	protein_coding	transcriptional repressor GATA binding 1 [Source:HGNC Symbol;Acc:HGNC:12340]	zf-GATA	1.93	1.59	0.306415	0.070497	0.981863
ENSG00000034053	APBA2	15	28884483	29118315	+	6869	protein_coding	amyloid beta precursor protein binding family A member 2 [Source:HGNC Symbol;Acc:HGNC:579]	-	9.37	11.98	-0.295222	0.0705835	0.981863
ENSG00000170989	S1PR1	1	101236865	101243713	+	5223	protein_coding	sphingosine-1-phosphate receptor 1 [Source:HGNC Symbol;Acc:HGNC:3165]	-	26.08	35.4	-0.370039	0.0706035	0.981863
ENSG00000215440	NPEPL1	20	58689131	58719238	+	7641	protein_coding	aminopeptidase like 1 [Source:HGNC Symbol;Acc:HGNC:16244]	-	1.61	1.21	0.401872	0.0706382	0.981863
ENSG00000100416	TRMU	22	46330875	46357340	+	9219	protein_coding	tRNA 5-methylaminomethyl-2-thiouridylate methyltransferase [Source:HGNC Symbol;Acc:HGNC:25481]	-	4.08	3.29	0.325616	0.0706481	0.981863
ENSG00000233694	LINC02579	2	64606975	64616482	+	1929	lincRNA	long intergenic non-protein coding RNA 2579 [Source:HGNC Symbol;Acc:HGNC:27942]	-	0	0.07	-0.496819	0.0707243	NA
ENSG00000197748	CFAP43	10	104129888	104232362	-	7184	protein_coding	cilia and flagella associated protein 43 [Source:HGNC Symbol;Acc:HGNC:26684]	-	0.08	0.03	0.659615	0.0708956	NA
ENSG00000250057	AC114781.2	4	83233512	83247213	-	394	lincRNA	novel transcript	-	10.28	7.74	0.404204	0.0708984	0.983718
ENSG00000277089	AC243829.4	17	36072866	36090134	+	1706	antisense	novel transcript, antisense CCL3	-	0.98	1.56	-0.516206	0.0709633	0.983718
ENSG00000123643	SLC36A1	5	151437046	151492381	+	6980	protein_coding	solute carrier family 36 member 1 [Source:HGNC Symbol;Acc:HGNC:18761]	-	9.26	6.85	0.431185	0.0709804	0.983718
ENSG00000229491	AC136489.1	X	45183251	45333917	+	1725	antisense	uncharacterized LOC105373191 [Source:NCBI gene;Acc:105373191]	-	0	0.08	-0.457596	0.0710744	NA
ENSG00000158292	GPR153	1	6247346	6260975	-	4082	protein_coding	G protein-coupled receptor 153 [Source:HGNC Symbol;Acc:HGNC:23618]	-	1.18	1.69	-0.423754	0.0710929	0.984358
ENSG00000272911	AC005696.3	17	2688473	2688960	+	303	lincRNA	novel transcript	-	0.03	0.49	-0.499949	0.0712241	NA
ENSG00000183308	AC005037.1	2	200963263	201009102	+	973	antisense	novel transcript	-	2.81	1.87	0.511248	0.071309	0.985369
ENSG00000145569	OTULINL	5	14581775	14615007	+	4074	protein_coding	OTU deubiquitinase with linear linkage specificity like [Source:HGNC Symbol;Acc:HGNC:25629]	-	13.76	10.23	0.419543	0.0713898	0.985369
ENSG00000100299	ARSA	22	50622754	50628173	-	2932	protein_coding	arylsulfatase A [Source:HGNC Symbol;Acc:HGNC:713]	-	46.2	38.08	0.304006	0.0713977	0.985369
ENSG00000186827	TNFRSF4	1	1211326	1214138	-	1721	protein_coding	TNF receptor superfamily member 4 [Source:HGNC Symbol;Acc:HGNC:11918]	-	4.03	3.1	0.376353	0.0714624	0.985369
ENSG00000183837	PNMA3	X	153056409	153060467	+	3748	protein_coding	PNMA family member 3 [Source:HGNC Symbol;Acc:HGNC:18742]	-	0.82	1.53	-0.609241	0.0715135	0.985369
ENSG00000124145	SDC4	20	45325288	45348424	-	2613	protein_coding	syndecan 4 [Source:HGNC Symbol;Acc:HGNC:10661]	-	1.25	0.91	0.440539	0.0717023	0.985369
ENSG00000243224	AC006252.1	3	52239258	52241097	+	1101	antisense	uncharacterized LOC101929054 [Source:NCBI gene;Acc:101929054]	-	0.97	0.45	0.652014	0.071721	0.985369
ENSG00000256379	TRAV8-5	14	21903077	21904598	+	341	TR_V_pseudogene	T cell receptor alpha variable 8-5 (pseudogene) [Source:HGNC Symbol;Acc:HGNC:12150]	-	0.9	2.41	-0.65883	0.071731	0.985369
ENSG00000141469	SLC14A1	18	45687025	45752520	+	7182	protein_coding	solute carrier family 14 member 1 (Kidd blood group) [Source:HGNC Symbol;Acc:HGNC:10918]	-	0.56	0.87	-0.503595	0.0717735	0.985369
ENSG00000204624	DISP3	1	11479166	11537584	+	6142	protein_coding	dispatched RND transporter family member 3 [Source:HGNC Symbol;Acc:HGNC:29251]	-	0.12	0.2	-0.579298	0.0718904	0.985369
ENSG00000168906	MAT2A	2	85539165	85545280	+	4487	protein_coding	methionine adenosyltransferase 2A [Source:HGNC Symbol;Acc:HGNC:6904]	-	22.37	19.26	0.25121	0.0718962	0.985369
ENSG00000106686	SPATA6L	9	4553386	4666674	-	7361	protein_coding	spermatogenesis associated 6 like [Source:HGNC Symbol;Acc:HGNC:25472]	-	0.09	0.16	-0.596933	0.0720974	0.987216
ENSG00000279928	FO538757.2	1	182696	184174	+	570	unprocessed_pseudogene	DEAD/H-box helicase 11 (DDX11) pseudogene	-	1.37	3.82	-0.656423	0.0721849	0.987262
ENSG00000116977	LGALS8	1	236518000	236552981	+	9710	protein_coding	galectin 8 [Source:HGNC Symbol;Acc:HGNC:6569]	-	1.26	1	0.346761	0.0722338	0.987262
ENSG00000018189	RUFY3	4	70704204	70807315	+	8070	protein_coding	RUN and FYVE domain containing 3 [Source:HGNC Symbol;Acc:HGNC:30285]	-	3.8	3.29	0.239162	0.0723371	0.987764
ENSG00000260360	AL353708.1	1	179953184	179954440	-	1257	lincRNA	novel transcript	-	0	0.14	-0.452991	0.0723676	NA
ENSG00000250039	AC096719.1	4	21949015	22330330	+	1874	antisense	novel transcript	-	0	0.06	-0.454272	0.0725106	NA
ENSG00000119227	PIGZ	3	196946343	196969060	-	3211	protein_coding	phosphatidylinositol glycan anchor biosynthesis class Z [Source:HGNC Symbol;Acc:HGNC:30596]	-	0.99	0.7	0.467325	0.0725764	0.990077
ENSG00000010379	SLC6A13	12	220621	262873	-	4243	protein_coding	solute carrier family 6 member 13 [Source:HGNC Symbol;Acc:HGNC:11046]	-	0.08	0.18	-0.647837	0.0726399	0.990077
ENSG00000211786	TRAV8-2	14	21846537	21847221	+	566	TR_V_gene	T cell receptor alpha variable 8-2 [Source:HGNC Symbol;Acc:HGNC:12147]	-	6.66	10.29	-0.496296	0.0727552	0.990739
ENSG00000205022	PABPN1L	16	88863333	88866660	-	1314	protein_coding	poly(A) binding protein nuclear 1 like, cytoplasmic [Source:HGNC Symbol;Acc:HGNC:37237]	-	1.49	0.81	0.614015	0.0728862	0.991613
ENSG00000085465	OVGP1	1	111414314	111427777	-	2567	protein_coding	oviductal glycoprotein 1 [Source:HGNC Symbol;Acc:HGNC:8524]	-	1.47	1.09	0.417156	0.0729896	0.992111
ENSG00000143185	XCL2	1	168540765	168543997	-	565	protein_coding	X-C motif chemokine ligand 2 [Source:HGNC Symbol;Acc:HGNC:10646]	-	7.96	14.7	-0.601191	0.073133	0.993099
ENSG00000233927	RPS28	19	8321158	8323340	+	2119	protein_coding	ribosomal protein S28 [Source:HGNC Symbol;Acc:HGNC:10418]	-	55.74	83.9	-0.478929	0.0731961	0.993099
ENSG00000185722	ANKFY1	17	4163907	4263995	-	14138	protein_coding	ankyrin repeat and FYVE domain containing 1 [Source:HGNC Symbol;Acc:HGNC:20763]	-	1.19	1	0.281627	0.0734825	0.995318
ENSG00000163393	SLC22A15	1	115976498	116070054	+	5292	protein_coding	solute carrier family 22 member 15 [Source:HGNC Symbol;Acc:HGNC:20301]	-	7.56	6.07	0.332487	0.0734938	0.995318
ENSG00000211911	IGHD3-22	14	105886031	105886061	-	31	IG_D_gene	immunoglobulin heavy diversity 3-22 [Source:HGNC Symbol;Acc:HGNC:5497]	-	7.52	1.81	0.607221	0.0735626	NA
ENSG00000260695	AC022164.1	16	65861112	65863784	-	2673	lincRNA	novel transcript	-	0.06	0	0.518764	0.073688	NA
ENSG00000285966	AC007686.4	14	76958098	77000609	-	2847	lincRNA	novel transcript	-	0.61	0.39	0.545479	0.0737015	0.995919
ENSG00000184985	SORCS2	4	7192538	7742836	+	6317	protein_coding	sortilin related VPS10 domain containing receptor 2 [Source:HGNC Symbol;Acc:HGNC:16698]	-	0.75	0.53	0.467601	0.0737315	0.995919
ENSG00000130592	LSP1	11	1852970	1892267	+	5399	protein_coding	lymphocyte specific protein 1 [Source:HGNC Symbol;Acc:HGNC:6707]	-	120.65	150.29	-0.26028	0.0737394	0.995919
ENSG00000249899	AC025180.1	5	52932419	52990278	-	611	antisense	novel transcript	-	0.05	0.31	-0.572892	0.0737449	NA
ENSG00000196860	TOMM20L	14	58395916	58408701	+	620	protein_coding	translocase of outer mitochondrial membrane 20 like [Source:HGNC Symbol;Acc:HGNC:33752]	-	0.44	0.11	0.608316	0.0738041	NA
ENSG00000258081	AL110292.1	14	26836728	27160420	+	919	lincRNA	novel transcript	-	0.14	0	0.454519	0.0738116	NA
ENSG00000196074	SYCP2	20	59863563	59933655	-	6466	protein_coding	synaptonemal complex protein 2 [Source:HGNC Symbol;Acc:HGNC:11490]	-	1.38	1.02	0.415073	0.0739071	0.99691
ENSG00000141934	PLPP2	19	281040	291504	-	7059	protein_coding	phospholipid phosphatase 2 [Source:HGNC Symbol;Acc:HGNC:9230]	-	0.16	0.07	0.653201	0.0739472	0.99691
ENSG00000253619	AC068413.1	8	120913065	121119754	+	776	lincRNA	novel transcript	-	0.04	0.27	-0.564475	0.0741015	NA
ENSG00000104774	MAN2B1	19	12646511	12666742	-	5374	protein_coding	mannosidase alpha class 2B member 1 [Source:HGNC Symbol;Acc:HGNC:6826]	-	27.71	22.09	0.338297	0.0746702	0.999904
ENSG00000160410	SHKBP1	19	40576851	40591399	+	3936	protein_coding	SH3KBP1 binding protein 1 [Source:HGNC Symbol;Acc:HGNC:19214]	-	74.99	95.92	-0.29537	0.0747312	0.999904
ENSG00000235374	SSR4P1	21	45070952	45074165	-	2636	transcribed_processed_pseudogene	signal sequence receptor subunit 4 pseudogene 1 [Source:HGNC Symbol;Acc:HGNC:23131]	-	0.22	0.44	-0.624702	0.0748165	0.999904
ENSG00000103249	CLCN7	16	1444934	1475580	-	8119	protein_coding	chloride voltage-gated channel 7 [Source:HGNC Symbol;Acc:HGNC:2025]	-	14.26	11.78	0.298998	0.0748437	0.999904
ENSG00000230099	TRBV5-4	7	142462916	142463581	+	544	TR_V_gene	T cell receptor beta variable 5-4 [Source:HGNC Symbol;Acc:HGNC:12221]	-	5.68	9.05	-0.51174	0.0748684	0.999904
ENSG00000135720	DYNC1LI2	16	66720893	66751798	-	8278	protein_coding	dynein cytoplasmic 1 light intermediate chain 2 [Source:HGNC Symbol;Acc:HGNC:2966]	-	3.22	2.61	0.325031	0.0749132	0.999904
ENSG00000248124	RRN3P1	16	21796106	21820410	-	5253	transcribed_unprocessed_pseudogene	RRN3 homolog, RNA polymerase I transcription factor pseudogene 1 [Source:HGNC Symbol;Acc:HGNC:30548]	-	5.55	4.7	0.267059	0.0750182	0.999904
ENSG00000253559	OSGEPL1-AS1	2	189762704	189765556	+	860	antisense	OSGEPL1 antisense RNA 1 [Source:HGNC Symbol;Acc:HGNC:41009]	-	0.24	0.6	-0.650846	0.0751061	NA
ENSG00000257543	AC063948.1	12	101408372	101409060	-	379	lincRNA	novel transcript	-	0.83	0.27	0.636858	0.0751158	NA
ENSG00000196396	PTPN1	20	50510321	50585241	+	4041	protein_coding	protein tyrosine phosphatase, non-receptor type 1 [Source:HGNC Symbol;Acc:HGNC:9642]	-	25.53	30.95	-0.231501	0.075454	0.999904
ENSG00000187837	HIST1H1C	6	26055787	26056428	-	642	protein_coding	histone cluster 1 H1 family member c [Source:HGNC Symbol;Acc:HGNC:4716]	-	26.04	36.51	-0.391691	0.0754643	0.999904
ENSG00000102445	RUBCNL	13	46342000	46438190	-	6105	protein_coding	RUN and cysteine rich domain containing beclin 1 interacting protein like [Source:HGNC Symbol;Acc:HGNC:20420]	-	15.44	19.93	-0.307692	0.0755482	0.999904
ENSG00000258989	AL355916.2	14	61529128	61657964	+	779	protein_coding	novel protein	-	0.32	0.07	0.59441	0.0755957	NA
ENSG00000203943	SAMD13	1	84298366	84389957	+	3455	protein_coding	sterile alpha motif domain containing 13 [Source:HGNC Symbol;Acc:HGNC:24582]	-	0.01	0.07	-0.592419	0.0756573	NA
ENSG00000147138	GPR174	X	79144663	79175315	+	5516	protein_coding	G protein-coupled receptor 174 [Source:HGNC Symbol;Acc:HGNC:30245]	-	8.06	10.75	-0.351428	0.0757734	0.999904
ENSG00000180938	ZNF572	8	124973298	124979389	+	3275	protein_coding	zinc finger protein 572 [Source:HGNC Symbol;Acc:HGNC:26758]	zf-C2H2	0.26	0.48	-0.599304	0.0757781	0.999904
ENSG00000153902	LGI4	19	35124513	35142451	-	4532	protein_coding	leucine rich repeat LGI family member 4 [Source:HGNC Symbol;Acc:HGNC:18712]	-	0.14	0.06	0.643121	0.0759155	0.999904
ENSG00000185022	MAFF	22	38200767	38216511	+	5615	protein_coding	MAF bZIP transcription factor F [Source:HGNC Symbol;Acc:HGNC:6780]	TF_bZIP	1.33	1.84	-0.383981	0.0760713	0.999904
ENSG00000142494	SLC47A1	17	19495385	19579034	+	5719	protein_coding	solute carrier family 47 member 1 [Source:HGNC Symbol;Acc:HGNC:25588]	-	0.14	0.06	0.647778	0.0760858	0.999904
ENSG00000105048	TNNT1	19	55132794	55149354	-	2171	protein_coding	troponin T1, slow skeletal type [Source:HGNC Symbol;Acc:HGNC:11948]	-	1.5	2.76	-0.599321	0.0760896	0.999904
ENSG00000249738	AC008691.1	5	159310745	159805536	+	13436	antisense	uncharacterized LOC285626 [Source:NCBI gene;Acc:285626]	-	0.06	0.11	-0.541404	0.0761077	0.999904
ENSG00000137970	RPL7P9	1	96678874	96679620	-	747	processed_pseudogene	ribosomal protein L7 pseudogene 9 [Source:HGNC Symbol;Acc:HGNC:37028]	-	82.59	69.91	0.270363	0.0762806	0.999904
ENSG00000176022	B3GALT6	1	1232226	1235041	+	2816	protein_coding	beta-1,3-galactosyltransferase 6 [Source:HGNC Symbol;Acc:HGNC:17978]	-	4.35	5.61	-0.304369	0.0762953	0.999904
ENSG00000115718	PROC	2	127418427	127429246	+	2495	protein_coding	protein C, inactivator of coagulation factors Va and VIIIa [Source:HGNC Symbol;Acc:HGNC:9451]	-	0.97	0.68	0.470128	0.0763845	0.999904
ENSG00000155026	RSPH10B	7	5925550	5970683	-	4993	protein_coding	radial spoke head 10 homolog B [Source:HGNC Symbol;Acc:HGNC:27362]	-	0.35	0.17	0.635853	0.0764397	0.999904
ENSG00000166377	ATP9B	18	79069285	79378287	+	14934	protein_coding	ATPase phospholipid transporting 9B (putative) [Source:HGNC Symbol;Acc:HGNC:13541]	-	1.73	1.48	0.257369	0.07651	0.999904
ENSG00000172031	EPHX4	1	92029982	92063536	+	2251	protein_coding	epoxide hydrolase 4 [Source:HGNC Symbol;Acc:HGNC:23758]	-	0.09	0.23	-0.647975	0.0765702	NA
ENSG00000153563	CD8A	2	86784610	86808396	-	3634	protein_coding	CD8a molecule [Source:HGNC Symbol;Acc:HGNC:1706]	-	39.17	60.43	-0.497537	0.0767164	0.999904
ENSG00000162139	NEU3	11	74988134	75018893	+	7556	protein_coding	neuraminidase 3 [Source:HGNC Symbol;Acc:HGNC:7760]	-	3.43	2.84	0.29745	0.076743	0.999904
ENSG00000272057	AC016575.1	5	14872332	14872713	+	382	lincRNA	novel transcript	-	0.3	0	0.448489	0.0767984	NA
ENSG00000109193	SULT1E1	4	69841212	69860152	-	2091	protein_coding	sulfotransferase family 1E member 1 [Source:HGNC Symbol;Acc:HGNC:11377]	-	0.29	0.01	0.477231	0.076799	NA
ENSG00000099284	H2AFY2	10	70052796	70112280	+	1980	protein_coding	H2A histone family member Y2 [Source:HGNC Symbol;Acc:HGNC:14453]	-	0.78	0.44	0.594939	0.0768045	0.999904
ENSG00000233493	TMEM238	19	55379245	55384598	-	1000	protein_coding	transmembrane protein 238 [Source:HGNC Symbol;Acc:HGNC:40042]	-	2.63	4	-0.47015	0.0768802	0.999904
ENSG00000125089	SH3TC1	4	8182072	8241803	+	10593	protein_coding	SH3 domain and tetratricopeptide repeats 1 [Source:HGNC Symbol;Acc:HGNC:26009]	-	5.86	4.76	0.321985	0.0769087	0.999904
ENSG00000156042	CFAP70	10	73253759	73358859	-	7428	protein_coding	cilia and flagella associated protein 70 [Source:HGNC Symbol;Acc:HGNC:30726]	-	0.61	0.45	0.422612	0.0770744	0.999904
ENSG00000165685	TMEM52B	12	10170542	10191801	+	3489	protein_coding	transmembrane protein 52B [Source:HGNC Symbol;Acc:HGNC:26438]	-	0.03	0	0.447802	0.0771319	NA
ENSG00000272463	AL357054.4	6	708592	711405	-	2814	lincRNA	novel transcript	-	0.26	0.46	-0.571511	0.0772372	0.999904
ENSG00000197586	ENTPD6	20	25195693	25226729	+	5327	protein_coding	ectonucleoside triphosphate diphosphohydrolase 6 (putative) [Source:HGNC Symbol;Acc:HGNC:3368]	-	8.44	7.38	0.228079	0.0773346	0.999904
ENSG00000225264	ZNRF2P2	7	29598795	29685255	-	887	transcribed_processed_pseudogene	zinc and ring finger 2 pseudogene 2 [Source:HGNC Symbol;Acc:HGNC:42793]	-	4.24	3.09	0.431203	0.0773454	0.999904
ENSG00000129295	LRRC6	8	132571953	132675617	-	2778	protein_coding	leucine rich repeat containing 6 [Source:HGNC Symbol;Acc:HGNC:16725]	-	2.21	1.62	0.427833	0.0773767	0.999904
ENSG00000100181	TPTEP1	22	16601887	16698742	+	9653	transcribed_unprocessed_pseudogene	TPTE pseudogene 1 [Source:HGNC Symbol;Acc:HGNC:43648]	-	1.01	0.79	0.368745	0.0776226	0.999904
ENSG00000122783	CYREN	7	135092363	135170795	-	5321	protein_coding	cell cycle regulator of NHEJ [Source:HGNC Symbol;Acc:HGNC:22432]	-	8.65	10.7	-0.258803	0.0776641	0.999904
ENSG00000174437	ATP2A2	12	110280756	110351093	+	13745	protein_coding	ATPase sarcoplasmic/endoplasmic reticulum Ca2+ transporting 2 [Source:HGNC Symbol;Acc:HGNC:812]	-	7.8	6.85	0.222291	0.0776686	0.999904
ENSG00000104671	DCTN6	8	30156297	30183640	+	1984	protein_coding	dynactin subunit 6 [Source:HGNC Symbol;Acc:HGNC:16964]	-	1.45	1.04	0.448231	0.0777282	0.999904
ENSG00000114993	RTKN	2	74425836	74442422	-	5190	protein_coding	rhotekin [Source:HGNC Symbol;Acc:HGNC:10466]	-	0.25	0.42	-0.53055	0.0778939	0.999904
ENSG00000112667	DNPH1	6	43225629	43229484	-	1250	protein_coding	2'-deoxynucleoside 5'-phosphate N-hydrolase 1 [Source:HGNC Symbol;Acc:HGNC:21218]	-	5.63	7.34	-0.321118	0.0778963	0.999904
ENSG00000184677	ZBTB40	1	22428838	22531157	+	9169	protein_coding	zinc finger and BTB domain containing 40 [Source:HGNC Symbol;Acc:HGNC:29045]	ZBTB	8.99	7.92	0.217187	0.0779177	0.999904
ENSG00000160654	CD3G	11	118344344	118355161	+	3836	protein_coding	CD3g molecule [Source:HGNC Symbol;Acc:HGNC:1675]	-	14.41	18.33	-0.292637	0.0779515	0.999904
ENSG00000044574	HSPA5	9	125234853	125241330	-	3908	protein_coding	heat shock protein family A (Hsp70) member 5 [Source:HGNC Symbol;Acc:HGNC:5238]	-	68.76	57.2	0.294324	0.0779865	0.999904
ENSG00000166261	ZNF202	11	123724177	123741675	-	4808	protein_coding	zinc finger protein 202 [Source:HGNC Symbol;Acc:HGNC:12994]	zf-C2H2	3.55	2.99	0.274145	0.0779882	0.999904
ENSG00000185088	RPS27L	15	63125872	63158021	-	9127	protein_coding	ribosomal protein S27 like [Source:HGNC Symbol;Acc:HGNC:18476]	-	1.74	2.25	-0.310993	0.0780077	0.999904
ENSG00000110811	P3H3	12	6828410	6839851	+	4601	protein_coding	prolyl 3-hydroxylase 3 [Source:HGNC Symbol;Acc:HGNC:19318]	-	0.32	0.2	0.550592	0.0780941	0.999904
ENSG00000123349	PFDN5	12	53295291	53299450	+	3380	protein_coding	prefoldin subunit 5 [Source:HGNC Symbol;Acc:HGNC:8869]	-	36.38	31.85	0.223296	0.0781413	0.999904
ENSG00000174227	PIGG	4	499210	540196	+	10895	protein_coding	phosphatidylinositol glycan anchor biosynthesis class G [Source:HGNC Symbol;Acc:HGNC:25985]	-	7.7	6.74	0.229318	0.0781422	0.999904
ENSG00000117480	FAAH	1	46394265	46413848	+	2776	protein_coding	fatty acid amide hydrolase [Source:HGNC Symbol;Acc:HGNC:3553]	-	5.5	3.52	0.52976	0.0782673	0.999904
ENSG00000179934	CCR8	3	39329706	39333511	+	1318	protein_coding	C-C motif chemokine receptor 8 [Source:HGNC Symbol;Acc:HGNC:1609]	-	0.46	0.97	-0.630787	0.0783281	0.999904
ENSG00000147533	GOLGA7	8	41490396	41510980	+	2474	protein_coding	golgin A7 [Source:HGNC Symbol;Acc:HGNC:24876]	-	26.99	32.58	-0.221748	0.0783283	0.999904
ENSG00000170442	KRT86	12	52249300	52309163	+	2394	protein_coding	keratin 86 [Source:HGNC Symbol;Acc:HGNC:6463]	-	0.11	0.33	-0.64143	0.0783508	0.999904
ENSG00000249375	CASC11	8	127686343	127733967	-	4678	lincRNA	cancer susceptibility 11 [Source:HGNC Symbol;Acc:HGNC:48939]	-	0.04	0.01	0.569192	0.0784024	NA
ENSG00000183864	TOB2	22	41433492	41447023	-	4565	protein_coding	transducer of ERBB2, 2 [Source:HGNC Symbol;Acc:HGNC:11980]	-	16.52	20.79	-0.278303	0.0785462	0.999904
ENSG00000224877	NDUFAF8	17	81239239	81241281	+	1376	protein_coding	NADH:ubiquinone oxidoreductase complex assembly factor 8 [Source:HGNC Symbol;Acc:HGNC:33551]	-	9.34	7.64	0.312492	0.0785867	0.999904
ENSG00000115306	SPTBN1	2	54456285	54671445	+	18504	protein_coding	spectrin beta, non-erythrocytic 1 [Source:HGNC Symbol;Acc:HGNC:11275]	-	5.87	7.07	-0.219362	0.0786878	0.999904
ENSG00000215009	ACSM4	12	7304284	7328724	+	2477	protein_coding	acyl-CoA synthetase medium chain family member 4 [Source:HGNC Symbol;Acc:HGNC:32016]	-	0.01	0.08	-0.547704	0.0787006	NA
ENSG00000260898	ADPGK-AS1	15	72782835	72798199	+	3138	antisense	ADPGK antisense RNA 1 [Source:HGNC Symbol;Acc:HGNC:44144]	-	0.16	0.06	0.642761	0.0787815	NA
ENSG00000154898	CCDC144CP	17	20321164	20403557	+	8145	transcribed_processed_pseudogene	coiled-coil domain containing 144C, pseudogene [Source:HGNC Symbol;Acc:HGNC:29073]	-	0.1	0.05	0.636366	0.0788381	0.999904
ENSG00000136840	ST6GALNAC4	9	127907886	127917038	-	2630	protein_coding	ST6 N-acetylgalactosaminide alpha-2,6-sialyltransferase 4 [Source:HGNC Symbol;Acc:HGNC:17846]	-	10.88	8.07	0.407134	0.0789992	0.999904
ENSG00000058668	ATP2B4	1	203626561	203744081	+	9721	protein_coding	ATPase plasma membrane Ca2+ transporting 4 [Source:HGNC Symbol;Acc:HGNC:817]	-	22.53	27.44	-0.238515	0.0791412	0.999904
ENSG00000214803	AC090921.1	8	124192671	124247398	-	1195	lincRNA	uncharacterized LOC101927588 [Source:NCBI gene;Acc:101927588]	-	0.31	0.63	-0.622917	0.0791868	0.999904
ENSG00000259399	TGIF2-RAB5IF	20	36574553	36612384	+	918	protein_coding	TGIF2-RAB5IF readthrough [Source:HGNC Symbol;Acc:HGNC:44664]	-	0.57	0.23	0.641735	0.0791981	NA
ENSG00000168502	MTCL1	18	8705661	8832778	+	12665	protein_coding	microtubule crosslinking factor 1 [Source:HGNC Symbol;Acc:HGNC:29121]	-	0.07	0.12	-0.552188	0.0792213	0.999904
ENSG00000105369	CD79A	19	41877120	41881372	+	1503	protein_coding	CD79a molecule [Source:HGNC Symbol;Acc:HGNC:1698]	-	78.62	97.71	-0.26464	0.0792861	0.999904
ENSG00000122512	PMS2	7	5973239	6009125	-	3936	protein_coding	PMS1 homolog 2, mismatch repair system component [Source:HGNC Symbol;Acc:HGNC:9122]	-	3.68	3.12	0.270468	0.0794065	0.999904
ENSG00000140332	TLE3	15	70047790	70098176	-	12634	protein_coding	transducin like enhancer of split 3 [Source:HGNC Symbol;Acc:HGNC:11839]	-	31.93	42.36	-0.333849	0.0794469	0.999904
ENSG00000132824	SERINC3	20	44496221	44522109	-	4683	protein_coding	serine incorporator 3 [Source:HGNC Symbol;Acc:HGNC:11699]	-	41.09	49.55	-0.21962	0.0795175	0.999904
ENSG00000230084	AC006059.1	3	42601963	42654388	-	785	antisense	novel transcript	-	1.56	0.75	0.633528	0.0795183	0.999904
ENSG00000268734	AC245128.3	19	54890673	54891420	+	748	lincRNA	novel transcript	-	14.15	9.45	0.506205	0.0795572	0.999904
ENSG00000149577	SIDT2	11	117178733	117197445	+	9061	protein_coding	SID1 transmembrane family member 2 [Source:HGNC Symbol;Acc:HGNC:24272]	-	9.81	11.81	-0.220191	0.0796524	0.999904
ENSG00000176177	ENTHD1	22	39743044	39893864	-	3068	protein_coding	ENTH domain containing 1 [Source:HGNC Symbol;Acc:HGNC:26352]	-	0.29	0.5	-0.55277	0.0797748	0.999904
ENSG00000198883	PNMA5	X	152988824	152994127	-	3439	protein_coding	PNMA family member 5 [Source:HGNC Symbol;Acc:HGNC:18743]	-	0.14	0.06	0.64088	0.0798493	NA
ENSG00000050165	DKK3	11	11963106	12009769	-	5059	protein_coding	dickkopf WNT signaling pathway inhibitor 3 [Source:HGNC Symbol;Acc:HGNC:2893]	-	0.07	0.17	-0.640199	0.0798991	0.999904
ENSG00000168961	LGALS9	17	27629798	27649560	+	5714	protein_coding	galectin 9 [Source:HGNC Symbol;Acc:HGNC:6570]	-	18.54	14.47	0.372119	0.0800468	0.999904
ENSG00000284719	AL033527.5	1	39799422	39809450	+	1744	lincRNA	novel transcript	-	0.96	0.53	0.6025	0.0800553	0.999904
ENSG00000189308	LIN54	4	82909973	83012926	-	6768	protein_coding	lin-54 DREAM MuvB core complex component [Source:HGNC Symbol;Acc:HGNC:25397]	-	3.41	4.22	-0.25473	0.0800712	0.999904
ENSG00000077420	APBB1IP	10	26438203	26567803	+	3981	protein_coding	amyloid beta precursor protein binding family B member 1 interacting protein [Source:HGNC Symbol;Acc:HGNC:17379]	-	100.57	126.57	-0.271969	0.0800817	0.999904
ENSG00000185386	MAPK11	22	50263713	50270767	-	2688	protein_coding	mitogen-activated protein kinase 11 [Source:HGNC Symbol;Acc:HGNC:6873]	-	1.03	1.49	-0.423268	0.0802234	0.999904
ENSG00000073350	LLGL2	17	75525080	75575208	+	7909	protein_coding	LLGL2, scribble cell polarity complex component [Source:HGNC Symbol;Acc:HGNC:6629]	-	6.14	7.76	-0.284538	0.0803838	0.999904
ENSG00000117791	43892	1	220748225	220784815	+	2597	protein_coding	mitochondrial amidoxime reducing component 2 [Source:HGNC Symbol;Acc:HGNC:26064]	-	0.31	0.56	-0.581184	0.0806204	0.999904
ENSG00000131697	NPHP4	1	5862811	5992473	-	13167	protein_coding	nephrocystin 4 [Source:HGNC Symbol;Acc:HGNC:19104]	-	1.4	1.15	0.298189	0.0808084	0.999904
ENSG00000225163	LINC00618	14	96931367	96945394	+	700	sense_overlapping	long intergenic non-protein coding RNA 618 [Source:HGNC Symbol;Acc:HGNC:20110]	-	2.49	1.58	0.534537	0.0808126	0.999904
ENSG00000285550	AC110014.1	18	44214971	44342315	+	943	lincRNA	novel transcript	-	0.04	0.27	-0.550829	0.0808168	NA
ENSG00000247137	AP000873.2	11	83184491	83193794	-	2986	processed_transcript	uncharacterized LOC100506282 [Source:NCBI gene;Acc:100506282]	-	1.63	1.26	0.371287	0.0808456	0.999904
ENSG00000211943	IGHV3-15	14	106153624	106154163	-	437	IG_V_gene	immunoglobulin heavy variable 3-15 [Source:HGNC Symbol;Acc:HGNC:5582]	-	15.47	10.78	0.47624	0.0808527	0.999904
ENSG00000234230	ZFX-AS1	X	24146225	24149654	-	417	antisense	ZFX antisense RNA 1 [Source:HGNC Symbol;Acc:HGNC:40617]	-	0	0.28	-0.43418	0.0808804	NA
ENSG00000259954	IL21R-AS1	16	27447669	27453393	-	2615	antisense	IL21R antisense RNA 1 [Source:HGNC Symbol;Acc:HGNC:27551]	-	0.04	0	0.438391	0.0809311	NA
ENSG00000075240	GRAMD4	22	46576012	46679790	+	4885	protein_coding	GRAM domain containing 4 [Source:HGNC Symbol;Acc:HGNC:29113]	-	11.14	9.24	0.294421	0.0809392	0.999904
ENSG00000134265	NAPG	18	10525905	10552761	+	5586	protein_coding	NSF attachment protein gamma [Source:HGNC Symbol;Acc:HGNC:7642]	-	5.31	4.54	0.259784	0.081195	0.999904
ENSG00000133027	PEMT	17	17505563	17591708	-	1720	protein_coding	phosphatidylethanolamine N-methyltransferase [Source:HGNC Symbol;Acc:HGNC:8830]	-	4.76	3.83	0.33077	0.0812937	0.999904
ENSG00000141068	KSR1	17	27456470	27626438	+	12178	protein_coding	kinase suppressor of ras 1 [Source:HGNC Symbol;Acc:HGNC:6465]	-	6.27	5.19	0.296998	0.0813244	0.999904
ENSG00000140450	ARRDC4	15	97960698	97973838	+	4072	protein_coding	arrestin domain containing 4 [Source:HGNC Symbol;Acc:HGNC:28087]	-	7.38	4.89	0.497562	0.0813897	0.999904
ENSG00000218350	LYPLA1P3	6	71165076	71165770	+	695	processed_pseudogene	lysophospholipase I pseudogene 3 [Source:HGNC Symbol;Acc:HGNC:44007]	-	0.39	0.92	-0.634907	0.0814133	NA
ENSG00000145860	RNF145	5	159157409	159210053	-	4614	protein_coding	ring finger protein 145 [Source:HGNC Symbol;Acc:HGNC:20853]	-	24.99	31.09	-0.262382	0.0814451	0.999904
ENSG00000258982	AL133523.1	14	100207407	100238555	-	331	antisense	novel transcript, antisense to YY1	-	2.06	0.9	0.636995	0.0814891	0.999904
ENSG00000143297	FCRL5	1	157513377	157552520	-	12419	protein_coding	Fc receptor like 5 [Source:HGNC Symbol;Acc:HGNC:18508]	-	1.68	2.31	-0.380181	0.0818736	0.999904
ENSG00000164188	RANBP3L	5	36248434	36302114	-	3363	protein_coding	RAN binding protein 3 like [Source:HGNC Symbol;Acc:HGNC:26353]	-	0.01	0.06	-0.578727	0.0818993	NA
ENSG00000243629	LINC00880	3	157081667	157123004	-	2018	lincRNA	long intergenic non-protein coding RNA 880 [Source:HGNC Symbol;Acc:HGNC:27948]	-	0.36	0.15	0.636034	0.0819326	0.999904
ENSG00000266714	MYO15B	17	75588058	75626501	+	12761	protein_coding	myosin XVB [Source:HGNC Symbol;Acc:HGNC:14083]	-	21.21	17.45	0.303129	0.0819436	0.999904
ENSG00000264615	RN7SL592P	9	2228961	2229241	-	281	misc_RNA	RNA, 7SL, cytoplasmic 592, pseudogene [Source:HGNC Symbol;Acc:HGNC:46608]	-	0	0.39	-0.431959	0.0819589	NA
ENSG00000228330	AL355355.1	10	13142185	13142977	-	793	processed_pseudogene	pseudogene similar to part of COX10 homolog, cytochrome c oxidase assembly protein, heme A: farnesyltransferase (yeast) (COX10)	-	0	0.14	-0.431959	0.0819589	NA
ENSG00000249926	AC117500.1	12	131662596	131664704	+	1561	lincRNA	novel transcript	-	0	0.07	-0.431959	0.0819589	NA
ENSG00000183077	AFMID	17	78187317	78207701	+	4048	protein_coding	arylformamidase [Source:HGNC Symbol;Acc:HGNC:20910]	-	1.4	1.04	0.405303	0.0819995	0.999904
ENSG00000245848	CEBPA	19	33299934	33302564	-	2631	protein_coding	CCAAT enhancer binding protein alpha [Source:HGNC Symbol;Acc:HGNC:1833]	C/EBP	6.49	5.11	0.35895	0.0820233	0.999904
ENSG00000115155	OTOF	2	26457203	26558698	-	7885	protein_coding	otoferlin [Source:HGNC Symbol;Acc:HGNC:8515]	-	0.11	0.06	0.605674	0.082046	0.999904
ENSG00000171502	COL24A1	1	85729233	86156943	-	9568	protein_coding	collagen type XXIV alpha 1 chain [Source:HGNC Symbol;Acc:HGNC:20821]	-	0.09	0.19	-0.617193	0.0820946	0.999904
ENSG00000196476	C20orf96	20	270863	290778	-	1730	protein_coding	chromosome 20 open reading frame 96 [Source:HGNC Symbol;Acc:HGNC:16227]	-	3	2.34	0.364029	0.0821559	0.999904
ENSG00000119915	ELOVL3	10	102226328	102229589	+	1371	protein_coding	ELOVL fatty acid elongase 3 [Source:HGNC Symbol;Acc:HGNC:18047]	-	0.47	0.16	0.618577	0.0822041	NA
ENSG00000151422	FER	5	108747822	109196841	+	13614	protein_coding	FER tyrosine kinase [Source:HGNC Symbol;Acc:HGNC:3655]	-	0.79	0.64	0.318628	0.0822238	0.999904
ENSG00000186480	INSIG1	7	155297776	155310235	+	3650	protein_coding	insulin induced gene 1 [Source:HGNC Symbol;Acc:HGNC:6083]	-	11.32	14.73	-0.316793	0.0822501	0.999904
ENSG00000101004	NINL	20	25452705	25585517	-	6008	protein_coding	ninein like [Source:HGNC Symbol;Acc:HGNC:29163]	-	0.6	1.04	-0.551923	0.08235	0.999904
ENSG00000105993	DNAJB6	7	157335381	157417439	+	14981	protein_coding	DnaJ heat shock protein family (Hsp40) member B6 [Source:HGNC Symbol;Acc:HGNC:14888]	-	8.41	10.56	-0.268763	0.0824462	0.999904
ENSG00000164104	HMGB2	4	173331695	173335125	-	2775	protein_coding	high mobility group box 2 [Source:HGNC Symbol;Acc:HGNC:5000]	HMG	42.02	51.23	-0.235391	0.0824657	0.999904
ENSG00000196547	MAN2A2	15	90902218	90922584	+	10002	protein_coding	mannosidase alpha class 2A member 2 [Source:HGNC Symbol;Acc:HGNC:6825]	-	22.95	19.43	0.272148	0.0825046	0.999904
ENSG00000231202	TRGVB	7	38295763	38296233	-	471	TR_V_pseudogene	T cell receptor gamma variable B (pseudogene) [Source:HGNC Symbol;Acc:HGNC:12297]	-	0.07	0.55	-0.520227	0.0825427	NA
ENSG00000184206	GOLGA6L4	15	84235773	84245368	+	6065	protein_coding	golgin A6 family-like 4 [Source:HGNC Symbol;Acc:HGNC:27256]	-	0.06	0.02	0.631102	0.0825548	NA
ENSG00000158445	KCNB1	20	49293394	49484297	-	17733	protein_coding	potassium voltage-gated channel subfamily B member 1 [Source:HGNC Symbol;Acc:HGNC:6231]	-	0.13	0.08	0.532725	0.0825879	0.999904
ENSG00000277112	ANKRD20A21P	20	30656033	30723932	-	3728	transcribed_unprocessed_pseudogene	ankyrin repeat domain 20 family member A21, pseudogene [Source:HGNC Symbol;Acc:HGNC:52329]	-	0.04	0	0.474509	0.0826805	NA
ENSG00000179580	RNF151	16	1966823	1968975	+	978	protein_coding	ring finger protein 151 [Source:HGNC Symbol;Acc:HGNC:23235]	-	0.18	0.03	0.539821	0.0826941	NA
ENSG00000273156	AC124016.2	4	82344876	82345540	-	665	lincRNA	novel transcript	-	0.12	0.44	-0.608987	0.0827626	NA
ENSG00000149403	GRIK4	11	120511700	120988904	+	7518	protein_coding	glutamate ionotropic receptor kainate type subunit 4 [Source:HGNC Symbol;Acc:HGNC:4582]	-	0.1	0.04	0.632646	0.0827862	0.999904
ENSG00000145919	BOD1	5	173607514	173616660	-	2018	protein_coding	biorientation of chromosomes in cell division 1 [Source:HGNC Symbol;Acc:HGNC:25114]	-	8.97	7.67	0.25586	0.0828991	0.999904
ENSG00000248092	NNT-AS1	5	43571594	43603230	-	6580	antisense	NNT antisense RNA 1 [Source:HGNC Symbol;Acc:HGNC:49005]	-	1.28	1.64	-0.296464	0.0830214	0.999904
ENSG00000144559	TAMM41	3	11790442	11846919	-	5925	protein_coding	TAM41 mitochondrial translocator assembly and maintenance homolog [Source:HGNC Symbol;Acc:HGNC:25187]	-	2.8	2.34	0.284438	0.0830689	0.999904
ENSG00000125869	LAMP5	20	9514358	9530524	+	2042	protein_coding	lysosomal associated membrane protein family member 5 [Source:HGNC Symbol;Acc:HGNC:16097]	-	0.74	1.21	-0.521611	0.083101	0.999904
ENSG00000224536	AC096677.1	1	201507241	201534784	+	1516	antisense	novel transcript	-	2.29	3.43	-0.460702	0.0831319	0.999904
ENSG00000124657	OR2B6	6	27957241	27958182	+	942	protein_coding	olfactory receptor family 2 subfamily B member 6 [Source:HGNC Symbol;Acc:HGNC:8241]	-	0.25	0.58	-0.631762	0.0833414	NA
ENSG00000259867	AC105411.1	16	80155053	80563135	-	2990	antisense	uncharacterized LOC102724084 [Source:NCBI gene;Acc:102724084]	-	0	0.04	-0.428526	0.0834254	NA
ENSG00000247516	MIR4458HG	5	8450743	8463095	+	4339	lincRNA	MIR4458 host gene [Source:HGNC Symbol;Acc:HGNC:49008]	-	0.21	0.11	0.618589	0.0835173	0.999904
ENSG00000280114	AL021920.2	1	16681097	16688749	-	1351	unprocessed_pseudogene	phosphodiesterase 4D interacting protein (myomegalin) (PDE4DIP) pseudogene	-	1.22	1.93	-0.501658	0.0835625	0.999904
ENSG00000185946	RNPC3	1	103525691	103555239	+	6867	protein_coding	RNA binding region (RNP1, RRM) containing 3 [Source:HGNC Symbol;Acc:HGNC:18666]	-	7.2	6.17	0.25295	0.0838029	0.999904
ENSG00000167528	ZNF641	12	48337180	48351414	-	8474	protein_coding	zinc finger protein 641 [Source:HGNC Symbol;Acc:HGNC:31834]	zf-C2H2	10.9	7.76	0.462287	0.0838905	0.999904
ENSG00000114812	VIPR1	3	42489299	42537573	+	7384	protein_coding	vasoactive intestinal peptide receptor 1 [Source:HGNC Symbol;Acc:HGNC:12694]	-	2.77	2.03	0.436952	0.0839999	0.999904
ENSG00000170027	YWHAG	7	76326794	76359031	-	3750	protein_coding	tyrosine 3-monooxygenase/tryptophan 5-monooxygenase activation protein gamma [Source:HGNC Symbol;Acc:HGNC:12852]	-	29.99	26.13	0.234215	0.0840465	0.999904
ENSG00000142875	PRKACB	1	84078062	84238498	+	6730	protein_coding	protein kinase cAMP-activated catalytic subunit beta [Source:HGNC Symbol;Acc:HGNC:9381]	-	13.42	18.79	-0.400635	0.0841337	0.999904
ENSG00000250596	AC096751.1	4	174523701	174540344	-	2214	transcribed_processed_pseudogene	Zinc finger protein pseudogene	-	0.41	0.15	0.628356	0.0843135	0.999904
ENSG00000097021	ACOT7	1	6264269	6394391	-	4124	protein_coding	acyl-CoA thioesterase 7 [Source:HGNC Symbol;Acc:HGNC:24157]	-	1.22	1.63	-0.34244	0.0843616	0.999904
ENSG00000272316	AL021368.2	6	57908560	57913911	-	5352	lincRNA	novel transcript	-	0.49	0.7	-0.396528	0.0844883	0.999904
ENSG00000142606	MMEL1	1	2590639	2632990	-	3844	protein_coding	membrane metalloendopeptidase like 1 [Source:HGNC Symbol;Acc:HGNC:14668]	-	0.1	0.04	0.625412	0.0846592	NA
ENSG00000223865	HLA-DPB1	6	33075926	33087201	+	2791	protein_coding	major histocompatibility complex, class II, DP beta 1 [Source:HGNC Symbol;Acc:HGNC:4940]	-	40.21	53.38	-0.346369	0.0846728	0.999904
ENSG00000248469	AC139491.1	5	176049678	176062021	-	1516	antisense	uncharacterized LOC100996385 [Source:NCBI gene;Acc:100996385]	-	0.06	0.24	-0.591963	0.0846876	NA
ENSG00000279821	AC145098.2	5	177476631	177479656	-	3026	TEC	TEC	-	1.82	2.7	-0.446056	0.0847006	0.999904
ENSG00000164037	SLC9B1	4	102885048	103019739	-	2977	protein_coding	solute carrier family 9 member B1 [Source:HGNC Symbol;Acc:HGNC:24244]	-	0.44	0.68	-0.488155	0.0848259	0.999904
ENSG00000197756	RPL37A	2	216498189	216579180	+	6841	protein_coding	ribosomal protein L37a [Source:HGNC Symbol;Acc:HGNC:10348]	-	44.61	39.86	0.198386	0.0849884	0.999904
ENSG00000015520	NPC1L1	7	44512535	44541315	-	5252	protein_coding	NPC1 like intracellular cholesterol transporter 1 [Source:HGNC Symbol;Acc:HGNC:7898]	-	0.05	0	0.509885	0.0850105	NA
ENSG00000196664	TLR7	X	12867083	12890380	+	5209	protein_coding	toll like receptor 7 [Source:HGNC Symbol;Acc:HGNC:15631]	-	5.58	3.97	0.455476	0.0850448	0.999904
ENSG00000181126	HLA-V	6	29790954	29797811	+	5662	transcribed_unprocessed_pseudogene	major histocompatibility complex, class I, V (pseudogene) [Source:HGNC Symbol;Acc:HGNC:23482]	-	0.05	0.01	0.592593	0.0853789	NA
ENSG00000236572	AC006369.2	2	37744333	37747046	+	384	lincRNA	novel transcript	-	0.13	0.58	-0.571238	0.0854423	NA
ENSG00000204272	NBDY	X	56729241	56818380	+	1707	protein_coding	negative regulator of P-body association [Source:HGNC Symbol;Acc:HGNC:50713]	-	4.88	6.64	-0.36582	0.0854997	0.999904
ENSG00000211801	TRAV21	14	22052514	22053056	+	343	TR_V_gene	T cell receptor alpha variable 21 [Source:HGNC Symbol;Acc:HGNC:12118]	-	8.57	11.99	-0.393057	0.0855928	0.999904
ENSG00000231793	DOC2GP	11	67612651	67616257	-	3146	transcribed_unitary_pseudogene	double C2 domain gamma pseudogene [Source:HGNC Symbol;Acc:HGNC:37962]	-	1.95	1.39	0.447162	0.0856703	0.999904
ENSG00000105204	DYRK1B	19	39825350	39834201	-	3192	protein_coding	dual specificity tyrosine phosphorylation regulated kinase 1B [Source:HGNC Symbol;Acc:HGNC:3092]	-	9.98	12.12	-0.230677	0.0856941	0.999904
ENSG00000213626	LBH	2	30231369	30323730	+	4697	protein_coding	limb bud and heart development [Source:HGNC Symbol;Acc:HGNC:29532]	-	49.31	66.85	-0.362916	0.0857256	0.999904
ENSG00000185920	PTCH1	9	95442980	95517057	-	16591	protein_coding	patched 1 [Source:HGNC Symbol;Acc:HGNC:9585]	-	1.73	2.42	-0.395499	0.0857354	0.999904
ENSG00000145990	GFOD1	6	13357830	13487662	-	10686	protein_coding	glucose-fructose oxidoreductase domain containing 1 [Source:HGNC Symbol;Acc:HGNC:21096]	-	1.86	2.54	-0.37882	0.0857936	0.999904
ENSG00000117411	B4GALT2	1	43978943	43991170	+	3772	protein_coding	beta-1,4-galactosyltransferase 2 [Source:HGNC Symbol;Acc:HGNC:925]	-	0.45	0.71	-0.498024	0.0858102	0.999904
ENSG00000198951	NAGA	22	42058354	42070842	-	3706	protein_coding	alpha-N-acetylgalactosaminidase [Source:HGNC Symbol;Acc:HGNC:7631]	-	24.59	21.04	0.253104	0.0859348	0.999904
ENSG00000237988	OR2I1P	6	29550407	29557721	+	5365	protein_coding	olfactory receptor family 2 subfamily I member 1 pseudogene [Source:HGNC Symbol;Acc:HGNC:8258]	-	0.01	0.06	-0.513321	0.085953	NA
ENSG00000169314	C22orf15	22	23763021	23765861	+	2086	protein_coding	chromosome 22 open reading frame 15 [Source:HGNC Symbol;Acc:HGNC:15558]	-	0.25	0.47	-0.589834	0.0859535	0.999904
ENSG00000087053	MTMR2	11	95832882	95925315	-	6119	protein_coding	myotubularin related protein 2 [Source:HGNC Symbol;Acc:HGNC:7450]	-	1.8	2.39	-0.344138	0.0860734	0.999904
ENSG00000134955	SLC37A2	11	125063067	125090312	+	6371	protein_coding	solute carrier family 37 member 2 [Source:HGNC Symbol;Acc:HGNC:20644]	-	8.74	7.26	0.289776	0.0863678	0.999904
ENSG00000263958	AC091138.1	18	72868388	72881399	+	534	lincRNA	myosin heavy chain IB-like [Source:NCBI gene;Acc:100505797]	-	0.31	0.03	0.491879	0.0863717	NA
ENSG00000170638	TRABD	22	50185915	50199598	+	3153	protein_coding	TraB domain containing [Source:HGNC Symbol;Acc:HGNC:28805]	-	46.88	40.07	0.25771	0.0863842	0.999904
ENSG00000157833	GAREM2	2	26173091	26189663	+	5939	protein_coding	GRB2 associated regulator of MAPK1 subtype 2 [Source:HGNC Symbol;Acc:HGNC:27172]	-	0.38	0.58	-0.476416	0.0864014	0.999904
ENSG00000215252	GOLGA8B	15	34525207	34588503	-	7670	protein_coding	golgin A8 family member B [Source:HGNC Symbol;Acc:HGNC:31973]	-	11.71	9.48	0.318933	0.0865366	0.999904
ENSG00000147408	CSGALNACT1	8	19404161	19758029	-	6580	protein_coding	chondroitin sulfate N-acetylgalactosaminyltransferase 1 [Source:HGNC Symbol;Acc:HGNC:24290]	-	5.72	4.79	0.279951	0.086544	0.999904
ENSG00000149499	EML3	11	62602218	62612765	-	5490	protein_coding	echinoderm microtubule associated protein like 3 [Source:HGNC Symbol;Acc:HGNC:26666]	-	22.95	20.11	0.222923	0.0866567	0.999904
ENSG00000162849	KIF26B	1	245154985	245709431	+	14403	protein_coding	kinesin family member 26B [Source:HGNC Symbol;Acc:HGNC:25484]	-	0.07	0.13	-0.594395	0.0866864	0.999904
ENSG00000224596	ZMIZ1-AS1	10	78943328	79067895	-	4427	antisense	ZMIZ1 antisense RNA 1 [Source:HGNC Symbol;Acc:HGNC:27433]	-	0.36	0.61	-0.548127	0.0867816	0.999904
ENSG00000204592	HLA-E	6	30489467	30494205	+	2975	protein_coding	major histocompatibility complex, class I, E [Source:HGNC Symbol;Acc:HGNC:4962]	-	1187.1	1406.66	-0.197468	0.0868274	0.999904
ENSG00000047648	ARHGAP6	X	11137543	11665701	-	7885	protein_coding	Rho GTPase activating protein 6 [Source:HGNC Symbol;Acc:HGNC:676]	-	0.93	1.21	-0.319147	0.0868733	0.999904
ENSG00000281379	SEPT14P19	19	186373	195696	-	634	transcribed_unprocessed_pseudogene	septin 14 pseudogene 19 [Source:HGNC Symbol;Acc:HGNC:51707]	-	0.58	1.23	-0.615083	0.0870461	0.999904
ENSG00000240296	AC245052.5	19	54268005	54269045	+	649	processed_pseudogene	YME1-like 1 (S. cerevisiae) (YME1L1) pseudogene	-	0.1	0.47	-0.55797	0.0871594	NA
ENSG00000283202	AC010149.2	2	230584815	230586715	-	315	unitary_pseudogene	Novel Sp100-like protein pseudogene	-	0	0.49	-0.418686	0.0871748	NA
ENSG00000039650	PNKP	19	49859882	49878351	-	4635	protein_coding	polynucleotide kinase 3'-phosphatase [Source:HGNC Symbol;Acc:HGNC:9154]	-	14.77	12.64	0.256079	0.0872128	0.999904
ENSG00000285666	AC006972.1	7	76818377	76903041	-	1155	lincRNA	novel transcript	-	0.01	0.14	-0.483566	0.087309	NA
ENSG00000140950	TLDC1	16	84476421	84554033	-	8159	protein_coding	TBC/LysM-associated domain containing 1 [Source:HGNC Symbol;Acc:HGNC:29325]	-	1.27	0.95	0.403709	0.0873852	0.999904
ENSG00000182308	DCAF4L1	4	41981696	41986467	+	4772	protein_coding	DDB1 and CUL4 associated factor 4 like 1 [Source:HGNC Symbol;Acc:HGNC:27723]	-	0.5	0.3	0.56005	0.0874885	0.999904
ENSG00000178307	TMEM11	17	21197280	21214624	-	3309	protein_coding	transmembrane protein 11 [Source:HGNC Symbol;Acc:HGNC:16823]	-	4.65	5.79	-0.263418	0.0875297	0.999904
ENSG00000161860	SYCE2	19	12898786	12919276	-	1458	protein_coding	synaptonemal complex central element protein 2 [Source:HGNC Symbol;Acc:HGNC:27411]	-	0.04	0.16	-0.578558	0.0875506	NA
ENSG00000160799	CCDC12	3	46921726	46982010	-	4754	protein_coding	coiled-coil domain containing 12 [Source:HGNC Symbol;Acc:HGNC:28332]	-	5.23	6.35	-0.231011	0.0876483	0.999904
ENSG00000143847	PPFIA4	1	203026498	203078740	+	9707	protein_coding	PTPRF interacting protein alpha 4 [Source:HGNC Symbol;Acc:HGNC:9248]	-	0.26	0.56	-0.618754	0.0876764	0.999904
ENSG00000269514	AC024257.3	12	48198357	48230275	+	6938	antisense	novel transcript, antisense to OR10AD1	-	0.32	0.22	0.467326	0.0878241	0.999904
ENSG00000211955	IGHV3-33	14	106359793	106360324	-	431	IG_V_gene	immunoglobulin heavy variable 3-33 [Source:HGNC Symbol;Acc:HGNC:5596]	-	20.05	15.08	0.397982	0.0878285	0.999904
ENSG00000255250	AP003059.2	11	86727355	86765265	+	503	lincRNA	novel transcript	-	0.21	0	0.42338	0.0878664	NA
ENSG00000125971	DYNLRB1	20	34516409	34540958	+	2460	protein_coding	dynein light chain roadblock-type 1 [Source:HGNC Symbol;Acc:HGNC:15468]	-	16.95	20.66	-0.234525	0.0878894	0.999904
ENSG00000153531	ADPRHL1	13	113399610	113453524	-	10924	protein_coding	ADP-ribosylhydrolase like 1 [Source:HGNC Symbol;Acc:HGNC:21303]	-	0.14	0.09	0.528889	0.0878903	0.999904
ENSG00000076770	MBNL3	X	132369317	132489968	-	12199	protein_coding	muscleblind like splicing regulator 3 [Source:HGNC Symbol;Acc:HGNC:20564]	-	0.99	0.75	0.384181	0.0879256	0.999904
ENSG00000182841	RRP7BP	22	42555223	42582038	-	5092	transcribed_unprocessed_pseudogene	ribosomal RNA processing 7 homolog B, pseudogene [Source:HGNC Symbol;Acc:HGNC:30454]	-	1.22	0.95	0.366477	0.0880168	0.999904
ENSG00000280071	GATD3B	21	5079294	5128425	-	3106	protein_coding	glutamine amidotransferase like class 1 domain containing 3B [Source:HGNC Symbol;Acc:HGNC:53816]	-	6.78	5.54	0.316452	0.0880313	0.999904
ENSG00000148154	UGCG	9	111896766	111935369	+	4615	protein_coding	UDP-glucose ceramide glucosyltransferase [Source:HGNC Symbol;Acc:HGNC:12524]	-	6.54	8.13	-0.255396	0.0880748	0.999904
ENSG00000228168	HNRNPA1P21	3	39334979	39335939	+	961	processed_pseudogene	heterogeneous nuclear ribonucleoprotein A1 pseudogene 21 [Source:HGNC Symbol;Acc:HGNC:39539]	-	0.82	1.56	-0.590942	0.0882362	0.999904
ENSG00000139192	TAPBPL	12	6451690	6466517	+	3188	protein_coding	TAP binding protein like [Source:HGNC Symbol;Acc:HGNC:30683]	-	23.34	19.99	0.249455	0.0882519	0.999904
ENSG00000273644	AC215522.1	7	37032	37477	+	446	processed_pseudogene	von Hippel-Lindau binding protein 1 (VBP1) pseudogene	-	0.26	0	0.421466	0.0883471	NA
ENSG00000148426	PROSER2	10	11823339	11872277	+	3663	protein_coding	proline and serine rich 2 [Source:HGNC Symbol;Acc:HGNC:23728]	-	0.03	0	0.421466	0.0883471	NA
ENSG00000277639	AC007906.2	16	53035690	53052873	-	1983	protein_coding	p53-regulated lncRNA 1 [Source:NCBI gene;Acc:105371267]	-	0.06	0	0.421466	0.0883471	NA
ENSG00000215301	DDX3X	X	41333284	41364472	+	15892	protein_coding	DEAD-box helicase 3 X-linked [Source:HGNC Symbol;Acc:HGNC:2745]	-	34.38	41.84	-0.230867	0.088432	0.999904
ENSG00000189045	ANKDD1B	5	75611459	75671846	+	3287	protein_coding	ankyrin repeat and death domain containing 1B [Source:HGNC Symbol;Acc:HGNC:32525]	-	0.29	0.15	0.608789	0.0884752	0.999904
ENSG00000177614	PGBD5	1	230314482	230426371	-	11304	protein_coding	piggyBac transposable element derived 5 [Source:HGNC Symbol;Acc:HGNC:19405]	-	0.01	0.04	-0.602505	0.088541	NA
ENSG00000231187	AL356056.2	10	46582782	46598145	-	991	antisense	uncharacterized LOC101927699 [Source:NCBI gene;Acc:101927699]	-	0.6	0.29	0.616614	0.0885696	NA
ENSG00000135912	TTLL4	2	218710845	218755416	+	7685	protein_coding	tubulin tyrosine ligase like 4 [Source:HGNC Symbol;Acc:HGNC:28976]	-	5.35	4.55	0.265422	0.0887561	0.999904
ENSG00000224848	AL589843.1	9	96687056	96721121	+	425	lincRNA	novel transcript	-	0.37	1.01	-0.61946	0.0887644	NA
ENSG00000135473	PAN2	12	56316223	56334053	-	7288	protein_coding	poly(A) specific ribonuclease subunit PAN2 [Source:HGNC Symbol;Acc:HGNC:20074]	-	7.72	6.57	0.261639	0.0887974	0.999904
ENSG00000205846	CLEC6A	12	8455926	8478330	+	1682	protein_coding	C-type lectin domain containing 6A [Source:HGNC Symbol;Acc:HGNC:14556]	-	0.78	0.39	0.615907	0.0888224	0.999904
ENSG00000239828	AC063944.1	3	107272611	107421304	-	3310	lincRNA	novel transcript	-	0	0.03	-0.416524	0.0888364	NA
ENSG00000267801	AC087289.5	17	75876372	75879546	+	3175	antisense	novel transcript, antisense to TRIM47	-	0	0.03	-0.416524	0.0888364	NA
ENSG00000128313	APOL5	22	35717872	35729483	+	1438	protein_coding	apolipoprotein L5 [Source:HGNC Symbol;Acc:HGNC:14869]	-	0	0.08	-0.416524	0.0888364	NA
ENSG00000189152	GRAPL	17	19127469	19159176	+	2028	protein_coding	GRB2 related adaptor protein like [Source:HGNC Symbol;Acc:HGNC:37240]	-	1.2	0.77	0.529155	0.0889551	0.999904
ENSG00000188859	FAM78B	1	166057426	166166969	-	5343	protein_coding	family with sequence similarity 78 member B [Source:HGNC Symbol;Acc:HGNC:13495]	-	0.02	0.07	-0.617683	0.0889609	NA
ENSG00000170946	DNAJC24	11	31369840	31431849	+	7592	protein_coding	DnaJ heat shock protein family (Hsp40) member C24 [Source:HGNC Symbol;Acc:HGNC:26979]	-	1.39	1.79	-0.30589	0.0889703	0.999904
ENSG00000259529	AL136295.5	14	24151218	24167402	+	4798	protein_coding	novel transcript	-	0.77	0.52	0.49377	0.089019	0.999904
ENSG00000243150	AC106707.1	3	158545220	158571066	-	1696	antisense	uncharacterized LOC100996447 [Source:NCBI gene;Acc:100996447]	-	0.15	0.02	0.49269	0.0890228	NA
ENSG00000117528	ABCD3	1	94418455	94518666	+	7589	protein_coding	ATP binding cassette subfamily D member 3 [Source:HGNC Symbol;Acc:HGNC:67]	-	3.42	2.96	0.240063	0.0890399	0.999904
ENSG00000247193	AC104078.1	4	36244116	36274220	+	1785	antisense	uncharacterized LOC439933 [Source:NCBI gene;Acc:439933]	-	0.29	0.12	0.621384	0.0890717	NA
ENSG00000163521	GLB1L	2	219236606	219245478	-	3411	protein_coding	galactosidase beta 1 like [Source:HGNC Symbol;Acc:HGNC:28129]	-	1.13	0.86	0.391652	0.0890852	0.999904
ENSG00000251655	PRB1	12	11351823	11395566	-	1311	protein_coding	proline rich protein BstNI subfamily 1 [Source:HGNC Symbol;Acc:HGNC:9337]	-	0.2	0.05	0.579477	0.089286	NA
ENSG00000164054	SHISA5	3	48467798	48504826	-	4664	protein_coding	shisa family member 5 [Source:HGNC Symbol;Acc:HGNC:30376]	-	69.21	87.08	-0.270804	0.0894035	0.999904
ENSG00000197299	BLM	15	90717327	90816165	+	6674	protein_coding	Bloom syndrome RecQ like helicase [Source:HGNC Symbol;Acc:HGNC:1058]	-	1.16	1.53	-0.339234	0.0894195	0.999904
ENSG00000221983	UBA52	19	18571730	18577550	+	4306	protein_coding	ubiquitin A-52 residue ribosomal protein fusion product 1 [Source:HGNC Symbol;Acc:HGNC:12458]	-	1.02	0.79	0.368671	0.089424	0.999904
ENSG00000100385	IL2RB	22	37125838	37175054	-	4700	protein_coding	interleukin 2 receptor subunit beta [Source:HGNC Symbol;Acc:HGNC:6009]	-	42.1	63.09	-0.457419	0.0894712	0.999904
ENSG00000184545	DUSP8	11	1554044	1571920	-	4616	protein_coding	dual specificity phosphatase 8 [Source:HGNC Symbol;Acc:HGNC:3074]	-	1.52	1.95	-0.300614	0.0894745	0.999904
ENSG00000126709	IFI6	1	27666061	27672218	-	865	protein_coding	interferon alpha inducible protein 6 [Source:HGNC Symbol;Acc:HGNC:4054]	-	48.29	63.69	-0.326492	0.0895203	0.999904
ENSG00000240489	SETP14	3	155987304	155988176	+	873	processed_pseudogene	SET pseudogene 14 [Source:HGNC Symbol;Acc:HGNC:42933]	-	0.9	0.43	0.617534	0.0895929	0.999904
ENSG00000115446	UNC50	2	98608579	98618515	+	2230	protein_coding	unc-50 inner nuclear membrane RNA binding protein [Source:HGNC Symbol;Acc:HGNC:16046]	-	23.8	20.88	0.221061	0.0896455	0.999904
ENSG00000180901	KCTD2	17	75032575	75065889	+	5279	protein_coding	potassium channel tetramerization domain containing 2 [Source:HGNC Symbol;Acc:HGNC:21294]	-	8.75	10.72	-0.238775	0.0896468	0.999904
ENSG00000183963	SMTN	22	31064105	31104757	+	10242	protein_coding	smoothelin [Source:HGNC Symbol;Acc:HGNC:11126]	-	0.47	0.37	0.368713	0.0896868	0.999904
ENSG00000205795	CYS1	2	10056780	10080944	-	2847	protein_coding	cystin 1 [Source:HGNC Symbol;Acc:HGNC:18525]	-	0.04	0	0.418762	0.089764	NA
ENSG00000267225	WDR7-OT1	18	57027832	57038845	+	565	sense_overlapping	WDR7 overlapping transcript 1 [Source:HGNC Symbol;Acc:HGNC:45131]	-	0.2	0	0.418762	0.089764	NA
ENSG00000019186	CYP24A1	20	54153449	54173973	-	3972	protein_coding	cytochrome P450 family 24 subfamily A member 1 [Source:HGNC Symbol;Acc:HGNC:2602]	-	0.03	0	0.418762	0.089764	NA
ENSG00000178809	TRIM73	7	75395063	75410996	+	5544	protein_coding	tripartite motif containing 73 [Source:HGNC Symbol;Acc:HGNC:18162]	-	0.72	0.54	0.409743	0.0897977	0.999904
ENSG00000027001	MIPEP	13	23730189	23889419	-	3407	protein_coding	mitochondrial intermediate peptidase [Source:HGNC Symbol;Acc:HGNC:7104]	-	1.05	1.48	-0.398706	0.089824	0.999904
ENSG00000187952	HS6ST1P1	1	21428303	21429536	+	1234	processed_pseudogene	heparan sulfate 6-O-sulfotransferase 1 pseudogene 1 [Source:HGNC Symbol;Acc:HGNC:31835]	-	0.05	0.41	-0.494754	0.0899235	NA
ENSG00000274922	AL139384.1	13	112686769	112689815	-	3047	lincRNA	novel transcript	-	0.88	0.57	0.520258	0.0899683	0.999904
ENSG00000172116	CD8B	2	86815339	86861924	-	1864	protein_coding	CD8b molecule [Source:HGNC Symbol;Acc:HGNC:1707]	-	23.95	36.68	-0.485097	0.0899994	0.999904
ENSG00000259182	AC019254.1	15	101168530	101170821	+	762	lincRNA	novel transcript	-	1.17	1.99	-0.544695	0.0900117	0.999904
ENSG00000182685	BRICD5	16	2209253	2211950	-	2083	protein_coding	BRICHOS domain containing 5 [Source:HGNC Symbol;Acc:HGNC:28309]	-	5.03	3.72	0.414004	0.0900349	0.999904
ENSG00000117385	P3H1	1	42746335	42767084	-	6766	protein_coding	prolyl 3-hydroxylase 1 [Source:HGNC Symbol;Acc:HGNC:19316]	-	4.35	3.61	0.292362	0.0900982	0.999904
ENSG00000168594	ADAM29	4	174829668	174978180	+	5957	protein_coding	ADAM metallopeptidase domain 29 [Source:HGNC Symbol;Acc:HGNC:207]	-	0.18	0.11	0.561143	0.0901023	0.999904
ENSG00000258405	ZNF578	19	52453576	52512154	+	7189	protein_coding	zinc finger protein 578 [Source:HGNC Symbol;Acc:HGNC:26449]	zf-C2H2	0.15	0.26	-0.524829	0.0903163	0.999904
ENSG00000253730	AC015909.2	17	50158333	50161276	-	547	antisense	novel transcript	-	2.61	1.68	0.521058	0.0904133	0.999904
ENSG00000139117	CPNE8	12	38646822	38907430	-	5178	protein_coding	copine 8 [Source:HGNC Symbol;Acc:HGNC:23498]	-	2.47	1.89	0.379137	0.0904329	0.999904
ENSG00000274712	AC005332.4	17	68205489	68207493	+	2005	lincRNA	novel transcript	-	4.38	5.75	-0.329666	0.0904744	0.999904
ENSG00000213366	GSTM2	1	109668022	109709551	+	9116	protein_coding	glutathione S-transferase mu 2 [Source:HGNC Symbol;Acc:HGNC:4634]	-	0.08	0.16	-0.584226	0.0905898	0.999904
ENSG00000234678	ELF3-AS1	1	201995696	202010463	-	5569	antisense	ELF3 antisense RNA 1 [Source:HGNC Symbol;Acc:HGNC:40211]	-	0.02	0	0.48234	0.0906519	NA
ENSG00000165689	ENTR1	9	136401922	136410609	-	3133	protein_coding	endosome associated trafficking regulator 1 [Source:HGNC Symbol;Acc:HGNC:10667]	-	12.45	10.75	0.243879	0.0907168	0.999904
ENSG00000228016	RAPGEF4-AS1	2	172677141	172736206	-	5217	antisense	RAPGEF4 antisense RNA 1 [Source:HGNC Symbol;Acc:HGNC:28081]	-	0	0.03	-0.472588	0.0907645	NA
ENSG00000182885	ADGRG3	16	57668187	57689378	+	3330	protein_coding	adhesion G protein-coupled receptor G3 [Source:HGNC Symbol;Acc:HGNC:13728]	-	21.59	26.39	-0.237877	0.0908446	0.999904
ENSG00000261798	AL033527.3	1	39788976	39790171	+	1196	antisense	uncharacterized LOC101929536 [Source:NCBI gene;Acc:101929536]	-	0.47	0.2	0.618681	0.0908581	NA
ENSG00000179213	SIGLECL1	19	51246348	51269330	+	2351	protein_coding	SIGLEC family like 1 [Source:HGNC Symbol;Acc:HGNC:26856]	-	0.15	0.05	0.590852	0.0908656	NA
ENSG00000232701	RPL21P108	13	74377163	74377951	-	481	processed_pseudogene	ribosomal protein L21 pseudogene 108 [Source:HGNC Symbol;Acc:HGNC:35496]	-	0.23	0	0.416658	0.0909327	NA
ENSG00000170458	CD14	5	140631728	140633701	-	1886	protein_coding	CD14 molecule [Source:HGNC Symbol;Acc:HGNC:1628]	-	216.35	163.1	0.39821	0.0909674	0.999904
ENSG00000258810	AL133371.2	14	20783888	20784293	+	294	antisense	novel transcript, antisense to RNASE1	-	6.68	4.39	0.510037	0.0909794	0.999904
ENSG00000264057	AC103810.1	17	64927634	64934203	+	968	transcribed_unprocessed_pseudogene	bromodomain PHD finger transcription factor (BPTF) pseudogene	-	0.34	0.74	-0.613082	0.0909826	0.999904
ENSG00000131323	TRAF3	14	102777476	102911500	+	8263	protein_coding	TNF receptor associated factor 3 [Source:HGNC Symbol;Acc:HGNC:12033]	-	9.56	8.32	0.232829	0.0910667	0.999904
ENSG00000188641	DPYD	1	97077743	97995000	-	7131	protein_coding	dihydropyrimidine dehydrogenase [Source:HGNC Symbol;Acc:HGNC:3012]	-	19.3	16.04	0.287961	0.0911465	0.999904
ENSG00000043514	TRIT1	1	39838110	39883511	-	6533	protein_coding	tRNA isopentenyltransferase 1 [Source:HGNC Symbol;Acc:HGNC:20286]	-	2.36	1.94	0.302184	0.0911854	0.999904
ENSG00000174373	RALGAPA1	14	35538352	35809304	-	14258	protein_coding	Ral GTPase activating protein catalytic alpha subunit 1 [Source:HGNC Symbol;Acc:HGNC:17770]	-	2.53	3.28	-0.305614	0.0912085	0.999904
ENSG00000259421	AL022318.2	22	39070414	39070671	+	258	unprocessed_pseudogene	apolipoprotein B mRNA editing enzyme, catalytic polypeptide-like 3 family member pseudogene	-	1	0.29	0.58332	0.0913143	NA
ENSG00000235162	C12orf75	12	105235290	105396097	+	2693	protein_coding	chromosome 12 open reading frame 75 [Source:HGNC Symbol;Acc:HGNC:35164]	-	10.37	14.26	-0.378992	0.0913732	0.999904
ENSG00000243304	AC008494.1	5	115264669	115265464	-	796	processed_pseudogene	ribosomal protein S2 (RPS2) pseudogene	-	0.12	0.42	-0.591817	0.0914209	NA
ENSG00000140941	MAP1LC3B	16	87383995	87404779	+	5313	protein_coding	microtubule associated protein 1 light chain 3 beta [Source:HGNC Symbol;Acc:HGNC:13352]	-	17.44	21.33	-0.23616	0.091468	0.999904
ENSG00000178440	LINC00843	10	49972763	49982053	+	711	lincRNA	long intergenic non-protein coding RNA 843 [Source:HGNC Symbol;Acc:HGNC:45009]	-	7.25	5.49	0.394452	0.0915334	0.999904
ENSG00000162377	COA7	1	52684451	52698366	-	4165	protein_coding	cytochrome c oxidase assembly factor 7 (putative) [Source:HGNC Symbol;Acc:HGNC:25716]	-	2.3	1.83	0.336211	0.0915567	0.999904
ENSG00000132475	H3F3B	17	75776434	75785893	-	6134	protein_coding	H3 histone family member 3B [Source:HGNC Symbol;Acc:HGNC:4765]	-	119.94	150.64	-0.268112	0.0915936	0.999904
ENSG00000078589	P2RY10	X	78945332	78961954	+	1803	protein_coding	P2Y receptor family member 10 [Source:HGNC Symbol;Acc:HGNC:19906]	-	16.51	20.21	-0.244093	0.0916701	0.999904
ENSG00000104419	NDRG1	8	133237171	133302022	-	9823	protein_coding	N-myc downstream regulated 1 [Source:HGNC Symbol;Acc:HGNC:7679]	-	12.76	15.57	-0.235134	0.0917852	0.999904
ENSG00000268117	VN1R84P	19	21719801	21720035	-	235	unprocessed_pseudogene	vomeronasal 1 receptor 84 pseudogene [Source:HGNC Symbol;Acc:HGNC:37404]	-	1.16	0.17	0.50536	0.0918014	NA
ENSG00000230454	U73166.1	3	50260303	50263358	+	2625	lincRNA	novel transcript	-	0.25	0.11	0.616141	0.0918387	0.999904
ENSG00000154102	C16orf74	16	85690084	85751129	-	2181	protein_coding	chromosome 16 open reading frame 74 [Source:HGNC Symbol;Acc:HGNC:23362]	-	8.21	6.78	0.293569	0.0918623	0.999904
ENSG00000156234	CXCL13	4	77511753	77611834	+	1431	protein_coding	C-X-C motif chemokine ligand 13 [Source:HGNC Symbol;Acc:HGNC:10639]	-	0.63	1.06	-0.530607	0.0919575	0.999904
ENSG00000113734	BNIP1	5	173144442	173164387	+	2440	protein_coding	BCL2 interacting protein 1 [Source:HGNC Symbol;Acc:HGNC:1082]	-	1.75	1.31	0.396507	0.0919673	0.999904
ENSG00000143321	HDGF	1	156742107	156766925	-	3745	protein_coding	heparin binding growth factor [Source:HGNC Symbol;Acc:HGNC:4856]	-	39.66	35.26	0.203292	0.0920704	0.999904
ENSG00000170604	IRF2BP1	19	45883607	45886170	-	2564	protein_coding	interferon regulatory factor 2 binding protein 1 [Source:HGNC Symbol;Acc:HGNC:21728]	-	9.55	11.71	-0.241262	0.0921015	0.999904
ENSG00000163660	CCNL1	3	157146508	157160760	-	8729	protein_coding	cyclin L1 [Source:HGNC Symbol;Acc:HGNC:20569]	-	28.61	24.46	0.253949	0.0921019	0.999904
ENSG00000160194	NDUFV3	21	42879644	42913304	+	6345	protein_coding	NADH:ubiquinone oxidoreductase subunit V3 [Source:HGNC Symbol;Acc:HGNC:7719]	-	3.83	3.33	0.234181	0.0921031	0.999904
ENSG00000107672	NSMCE4A	10	121957088	121975217	-	3546	protein_coding	NSE4 homolog A, SMC5-SMC6 complex component [Source:HGNC Symbol;Acc:HGNC:25935]	-	7.34	6.31	0.246699	0.0921718	0.999904
ENSG00000093072	ADA2	22	17178790	17258235	-	8704	protein_coding	adenosine deaminase 2 [Source:HGNC Symbol;Acc:HGNC:1839]	-	38.8	33.61	0.236443	0.0921939	0.999904
ENSG00000233538	AC017104.3	2	231452195	231453153	+	568	lincRNA	novel transcript	-	0.01	0.25	-0.449929	0.0922028	NA
ENSG00000198673	FAM19A2	12	61708259	62279150	-	9255	protein_coding	family with sequence similarity 19 member A2, C-C motif chemokine like [Source:HGNC Symbol;Acc:HGNC:21589]	-	1.29	1.05	0.315282	0.0922051	0.999904
ENSG00000259004	LINC02285	14	101120856	101123542	+	943	lincRNA	long intergenic non-protein coding RNA 2285 [Source:HGNC Symbol;Acc:HGNC:53202]	-	2.11	1.19	0.582159	0.0922423	0.999904
ENSG00000240521	AC092979.1	3	148850933	148960112	-	1414	antisense	novel transcript	-	0.44	0.79	-0.558355	0.0922672	0.999904
ENSG00000241163	LINC00877	3	72035300	72279503	-	4878	lincRNA	long intergenic non-protein coding RNA 877 [Source:HGNC Symbol;Acc:HGNC:27706]	-	6.45	4.97	0.377954	0.0922748	0.999904
ENSG00000075035	WSCD2	12	108129471	108250537	+	6557	protein_coding	WSC domain containing 2 [Source:HGNC Symbol;Acc:HGNC:29117]	-	0.01	0.06	-0.516035	0.0922783	NA
ENSG00000164896	FASTK	7	151076593	151080866	-	3805	protein_coding	Fas activated serine/threonine kinase [Source:HGNC Symbol;Acc:HGNC:24676]	-	15.11	13.07	0.241192	0.0922851	0.999904
ENSG00000196628	TCF4	18	55222331	55664787	-	27828	protein_coding	transcription factor 4 [Source:HGNC Symbol;Acc:HGNC:11634]	bHLH	0.96	1.2	-0.270854	0.0923166	0.999904
ENSG00000184384	MAML2	11	95976598	96343180	-	7109	protein_coding	mastermind like transcriptional coactivator 2 [Source:HGNC Symbol;Acc:HGNC:16259]	-	6.61	8.32	-0.272427	0.0923733	0.999904
ENSG00000260851	AC010542.3	16	66469812	66517312	-	843	protein_coding	novel transcript	-	3.17	1.83	0.566476	0.0924313	0.999904
ENSG00000162913	OBSCN-AS1	1	228203506	228213664	-	3647	antisense	OBSCN antisense RNA 1 [Source:HGNC Symbol;Acc:HGNC:32047]	-	0.33	0.21	0.537215	0.0924841	0.999904
ENSG00000146938	NLGN4X	X	5840637	6228863	-	7441	protein_coding	neuroligin 4 X-linked [Source:HGNC Symbol;Acc:HGNC:14287]	-	0.04	0	0.518003	0.0924935	NA
ENSG00000139410	SDSL	12	113422237	113438276	+	2216	protein_coding	serine dehydratase like [Source:HGNC Symbol;Acc:HGNC:30404]	-	0.73	0.41	0.581259	0.092542	0.999904
ENSG00000111843	TMEM14C	6	10722915	10731129	+	1321	protein_coding	transmembrane protein 14C [Source:HGNC Symbol;Acc:HGNC:20952]	-	18.16	14.98	0.294639	0.0925554	0.999904
ENSG00000014257	ACPP	3	132317367	132368298	+	4193	protein_coding	acid phosphatase, prostate [Source:HGNC Symbol;Acc:HGNC:125]	-	5.85	4.36	0.415667	0.0926199	0.999904
ENSG00000103150	MLYCD	16	83899126	83927026	+	16161	protein_coding	malonyl-CoA decarboxylase [Source:HGNC Symbol;Acc:HGNC:7150]	-	0.35	0.27	0.346252	0.0927176	0.999904
ENSG00000211725	TRBV5-5	7	142482548	142483019	+	350	TR_V_gene	T cell receptor beta variable 5-5 [Source:HGNC Symbol;Acc:HGNC:12222]	-	2.46	4.36	-0.560422	0.0928757	0.999904
ENSG00000135124	P2RX4	12	121209857	121234106	+	8159	protein_coding	purinergic receptor P2X 4 [Source:HGNC Symbol;Acc:HGNC:8535]	-	3.85	3.33	0.240269	0.0929822	0.999904
ENSG00000285458	AC093827.5	4	86886472	86936178	-	2497	protein_coding	novel protein	-	0.51	0.32	0.533838	0.0930431	0.999904
ENSG00000160888	IER2	19	13150415	13154908	+	3072	protein_coding	immediate early response 2 [Source:HGNC Symbol;Acc:HGNC:28871]	-	24.72	30.46	-0.247478	0.093059	0.999904
ENSG00000137648	TMPRSS4	11	118077012	118121890	+	9948	protein_coding	transmembrane serine protease 4 [Source:HGNC Symbol;Acc:HGNC:11878]	-	0	0.01	-0.407579	0.0930811	NA
ENSG00000108406	DHX40	17	59565525	59608345	+	5939	protein_coding	DEAH-box helicase 40 [Source:HGNC Symbol;Acc:HGNC:18018]	-	5.61	6.88	-0.241104	0.093092	0.999904
ENSG00000067057	PFKP	10	3066333	3137712	+	4836	protein_coding	phosphofructokinase, platelet [Source:HGNC Symbol;Acc:HGNC:8878]	-	10.95	13.15	-0.215588	0.0931881	0.999904
ENSG00000162302	RPS6KA4	11	64359148	64372215	+	3807	protein_coding	ribosomal protein S6 kinase A4 [Source:HGNC Symbol;Acc:HGNC:10433]	-	21.84	18.13	0.293108	0.0931912	0.999904
ENSG00000128536	CDHR3	7	105876796	106033773	+	7087	protein_coding	cadherin related family member 3 [Source:HGNC Symbol;Acc:HGNC:26308]	-	1.41	1.96	-0.384943	0.0932908	0.999904
ENSG00000168209	DDIT4	10	72273920	72276036	+	2058	protein_coding	DNA damage inducible transcript 4 [Source:HGNC Symbol;Acc:HGNC:24944]	-	5.9	4.28	0.429698	0.0933993	0.999904
ENSG00000144048	DUSP11	2	73762184	73780157	-	3544	protein_coding	dual specificity phosphatase 11 [Source:HGNC Symbol;Acc:HGNC:3066]	-	6.64	8.17	-0.248278	0.0934714	0.999904
ENSG00000170509	HSD17B13	4	87303789	87322906	-	2397	protein_coding	hydroxysteroid 17-beta dehydrogenase 13 [Source:HGNC Symbol;Acc:HGNC:18685]	-	0.48	0.87	-0.567697	0.093476	0.999904
ENSG00000278540	ACACA	17	37084988	37406818	-	13008	protein_coding	acetyl-CoA carboxylase alpha [Source:HGNC Symbol;Acc:HGNC:84]	-	1.39	1.75	-0.280319	0.0936393	0.999904
ENSG00000170190	SLC16A5	17	75087727	75106162	+	3089	protein_coding	solute carrier family 16 member 5 [Source:HGNC Symbol;Acc:HGNC:10926]	-	24.77	19.98	0.328279	0.0936674	0.999904
ENSG00000175550	DRAP1	11	65919257	65921561	+	1737	protein_coding	DR1 associated protein 1 [Source:HGNC Symbol;Acc:HGNC:3019]	-	40.44	48.11	-0.203251	0.0936877	0.999904
ENSG00000149474	KAT14	20	18138118	18188387	+	4251	protein_coding	lysine acetyltransferase 14 [Source:HGNC Symbol;Acc:HGNC:15904]	-	2.78	3.58	-0.299617	0.0937257	0.999904
ENSG00000146776	ATXN7L1	7	105605067	105876604	-	8295	protein_coding	ataxin 7 like 1 [Source:HGNC Symbol;Acc:HGNC:22210]	-	3.08	3.76	-0.237659	0.093967	0.999904
ENSG00000232553	CLK2P1	7	23585062	23586355	-	1294	processed_pseudogene	CDC like kinase 2, pseudogene 1 [Source:HGNC Symbol;Acc:HGNC:2070]	-	0.1	0.29	-0.608024	0.0941453	NA
ENSG00000238009	AL627309.1	1	89295	133723	-	3726	lincRNA	novel transcript	-	1.44	2.5	-0.542373	0.0942628	0.999904
ENSG00000260743	AC007823.1	3	179340322	179341887	+	1566	lincRNA	novel transcript	-	0.25	0.07	0.564367	0.0944721	NA
ENSG00000183281	PLGLB1	2	87002559	87021852	-	3220	protein_coding	plasminogen-like B1 [Source:HGNC Symbol;Acc:HGNC:9072]	-	0.45	0.28	0.536832	0.0945101	0.999904
ENSG00000121753	ADGRB2	1	31727117	31764893	-	7756	protein_coding	adhesion G protein-coupled receptor B2 [Source:HGNC Symbol;Acc:HGNC:944]	-	0.3	0.58	-0.575872	0.0945253	0.999904
ENSG00000115520	COQ10B	2	197453423	197475308	+	2722	protein_coding	coenzyme Q10B [Source:HGNC Symbol;Acc:HGNC:25819]	-	11.93	14.44	-0.225376	0.0947418	0.999904
ENSG00000169375	SIN3A	15	75369379	75455842	-	12453	protein_coding	SIN3 transcription regulator family member A [Source:HGNC Symbol;Acc:HGNC:19353]	-	7.53	9.42	-0.265233	0.0951769	0.999904
ENSG00000273258	AC016737.2	2	174011856	174012975	-	358	lincRNA	novel transcript	-	0.8	0.12	0.496339	0.0953469	NA
ENSG00000131873	CHSY1	15	101175723	101251932	-	5555	protein_coding	chondroitin sulfate synthase 1 [Source:HGNC Symbol;Acc:HGNC:17198]	-	13.72	17.66	-0.30134	0.0953633	0.999904
ENSG00000221978	CCNL2	1	1385711	1399328	-	6850	protein_coding	cyclin L2 [Source:HGNC Symbol;Acc:HGNC:20570]	-	28.07	24.44	0.230092	0.0954572	0.999904
ENSG00000172322	CLEC12A	12	9951316	9995694	+	3250	protein_coding	C-type lectin domain family 12 member A [Source:HGNC Symbol;Acc:HGNC:31713]	-	21.8	16.54	0.38409	0.0954638	0.999904
ENSG00000162747	FCGR3B	1	161623196	161631963	-	3073	protein_coding	Fc fragment of IgG receptor IIIb [Source:HGNC Symbol;Acc:HGNC:3620]	-	657.13	825.45	-0.269386	0.0954848	0.999904
ENSG00000203756	TMEM244	6	129831244	129861547	-	670	protein_coding	transmembrane protein 244 [Source:HGNC Symbol;Acc:HGNC:21571]	-	0.42	1.05	-0.608571	0.0954939	0.999904
ENSG00000279278	AC245060.6	22	22264601	22273020	+	8420	lincRNA	novel transcript	-	0.47	0.63	-0.349422	0.0955909	0.999904
ENSG00000127920	GNG11	7	93921699	93928610	+	3055	protein_coding	G protein subunit gamma 11 [Source:HGNC Symbol;Acc:HGNC:4403]	-	12.39	15.42	-0.258771	0.0955968	0.999904
ENSG00000250741	NT5C1B-RDH14	2	18555545	18589564	-	2150	protein_coding	NT5C1B-RDH14 readthrough [Source:HGNC Symbol;Acc:HGNC:38831]	-	0.08	0.01	0.512407	0.0957141	NA
ENSG00000180574	EIF2S3B	12	10505602	10523135	+	2423	protein_coding	eukaryotic translation initiation factor 2 subunit gamma B [Source:HGNC Symbol;Acc:HGNC:43863]	-	1.16	1.65	-0.404927	0.0962256	0.999904
ENSG00000167772	ANGPTL4	19	8363289	8374373	+	2482	protein_coding	angiopoietin like 4 [Source:HGNC Symbol;Acc:HGNC:16039]	-	0.26	0.13	0.601749	0.0963227	0.999904
ENSG00000264031	ABHD15-AS1	17	29560547	29707090	+	187	antisense	ABHD15 antisense RNA 1 [Source:HGNC Symbol;Acc:HGNC:49685]	-	1.15	0.3	0.558951	0.0964145	NA
ENSG00000254521	SIGLEC12	19	51491357	51501789	-	2201	protein_coding	sialic acid binding Ig like lectin 12 (gene/pseudogene) [Source:HGNC Symbol;Acc:HGNC:15482]	-	1.49	1.09	0.415602	0.0964778	0.999904
ENSG00000226609	AL390067.1	9	112748902	112750456	-	420	antisense	novel transcript	-	0.67	0.18	0.565071	0.0965406	NA
ENSG00000268043	NBPF12	1	146938744	146996202	+	7272	protein_coding	NBPF member 12 [Source:HGNC Symbol;Acc:HGNC:24297]	-	6.64	5.77	0.233827	0.0966117	0.999904
ENSG00000127314	RAP1B	12	68610839	68671901	+	16942	protein_coding	RAP1B, member of RAS oncogene family [Source:HGNC Symbol;Acc:HGNC:9857]	-	12.71	15.13	-0.206635	0.0969057	0.999904
ENSG00000223660	AC245052.1	19	54199454	54199971	-	410	lincRNA	novel transcript	-	0.21	0.84	-0.557745	0.0969066	NA
ENSG00000141446	ESCO1	18	21529281	21600884	-	5288	protein_coding	establishment of sister chromatid cohesion N-acetyltransferase 1 [Source:HGNC Symbol;Acc:HGNC:24645]	-	6.11	7.47	-0.235061	0.096984	0.999904
ENSG00000119408	NEK6	9	124257606	124353307	+	4419	protein_coding	NIMA related kinase 6 [Source:HGNC Symbol;Acc:HGNC:7749]	-	20.37	17.8	0.229703	0.0969939	0.999904
ENSG00000148019	CEP78	9	78236062	78279690	+	14355	protein_coding	centrosomal protein 78 [Source:HGNC Symbol;Acc:HGNC:25740]	-	2.68	3.62	-0.35793	0.0970218	0.999904
ENSG00000130812	ANGPTL6	19	10092338	10102796	-	2181	protein_coding	angiopoietin like 6 [Source:HGNC Symbol;Acc:HGNC:23140]	-	1.01	0.63	0.525501	0.097044	0.999904
ENSG00000128228	SDF2L1	22	21642261	21644298	+	1099	protein_coding	stromal cell derived factor 2 like 1 [Source:HGNC Symbol;Acc:HGNC:10676]	-	14.56	12.23	0.276505	0.0971034	0.999904
ENSG00000268833	AC243967.2	19	41757898	41786893	-	567	antisense	novel transcript, antisense to CEACAM6	-	0.25	0.68	-0.60228	0.0971873	NA
ENSG00000138640	FAM13A	4	88725955	89111398	-	13215	protein_coding	family with sequence similarity 13 member A [Source:HGNC Symbol;Acc:HGNC:19367]	-	0.96	0.78	0.304575	0.0972525	0.999904
ENSG00000279602	AC109326.1	17	43360041	43361361	-	1321	TEC	TEC	-	0.02	0.19	-0.487611	0.0974825	NA
ENSG00000118298	CA14	1	150257159	150265078	+	3833	protein_coding	carbonic anhydrase 14 [Source:HGNC Symbol;Acc:HGNC:1372]	-	0.16	0.07	0.602605	0.0975215	NA
ENSG00000143774	GUK1	1	228139962	228148984	+	4725	protein_coding	guanylate kinase 1 [Source:HGNC Symbol;Acc:HGNC:4693]	-	73.48	54.8	0.394817	0.0975771	0.999904
ENSG00000135069	PSAT1	9	78297143	78330093	+	2188	protein_coding	phosphoserine aminotransferase 1 [Source:HGNC Symbol;Acc:HGNC:19129]	-	2.31	1.64	0.450364	0.0976161	0.999904
ENSG00000175787	ZNF169	9	94259311	94301454	+	5286	protein_coding	zinc finger protein 169 [Source:HGNC Symbol;Acc:HGNC:12957]	zf-C2H2	2.7	2.29	0.267612	0.0976238	0.999904
ENSG00000160883	HK3	5	176880869	176899332	-	3290	protein_coding	hexokinase 3 [Source:HGNC Symbol;Acc:HGNC:4925]	-	71.92	50.41	0.457482	0.0976709	0.999904
ENSG00000261360	AC010491.1	5	14661808	14664604	-	2797	antisense	novel transcript, antisense to FAM105B	-	0.31	0.17	0.588938	0.0977012	0.999904
ENSG00000100290	BIK	22	43110748	43129712	+	953	protein_coding	BCL2 interacting killer [Source:HGNC Symbol;Acc:HGNC:1051]	-	2.87	4.52	-0.489497	0.0978063	0.999904
ENSG00000134802	SLC43A3	11	57406954	57427580	-	4517	protein_coding	solute carrier family 43 member 3 [Source:HGNC Symbol;Acc:HGNC:17466]	-	1.62	1.28	0.350374	0.0978799	0.999904
ENSG00000183258	DDX41	5	177511577	177517469	-	4536	protein_coding	DEAD-box helicase 41 [Source:HGNC Symbol;Acc:HGNC:18674]	-	11.49	10.1	0.218089	0.0982136	0.999904
ENSG00000185989	RASA3	13	113977783	114132611	-	4763	protein_coding	RAS p21 protein activator 3 [Source:HGNC Symbol;Acc:HGNC:20331]	-	52.72	64.06	-0.234449	0.0982726	0.999904
ENSG00000158792	SPATA2L	16	89696343	89701705	-	2482	protein_coding	spermatogenesis associated 2 like [Source:HGNC Symbol;Acc:HGNC:28393]	-	5.8	7.53	-0.308906	0.0983408	0.999904
ENSG00000256806	C17orf100	17	6651718	6693202	+	2474	protein_coding	chromosome 17 open reading frame 100 [Source:HGNC Symbol;Acc:HGNC:34494]	-	1.77	1.33	0.397843	0.0984018	0.999904
ENSG00000136271	DDX56	7	44565417	44575051	-	4068	protein_coding	DEAD-box helicase 56 [Source:HGNC Symbol;Acc:HGNC:18193]	-	11.82	10.34	0.223057	0.0984806	0.999904
ENSG00000169744	LDB2	4	16501541	16898809	-	5586	protein_coding	LIM domain binding 2 [Source:HGNC Symbol;Acc:HGNC:6533]	-	0.1	0.29	-0.597082	0.0984841	0.999904
ENSG00000235119	AL138895.1	9	114396724	114398503	-	173	lincRNA	novel transcript	-	8.49	5.32	0.531544	0.0987546	0.999904
ENSG00000265692	LINC01970	17	82290046	82292814	-	1810	lincRNA	long intergenic non-protein coding RNA 1970 [Source:HGNC Symbol;Acc:HGNC:52796]	-	0.19	0.06	0.573588	0.0987703	NA
ENSG00000224034	LINC02561	10	5266033	5271236	-	692	lincRNA	long intergenic non-protein coding RNA 2561 [Source:HGNC Symbol;Acc:HGNC:53601]	-	0.18	0.53	-0.589183	0.0987988	NA
ENSG00000211973	IGHV1-69	14	106714684	106715181	-	412	IG_V_gene	immunoglobulin heavy variable 1-69 [Source:HGNC Symbol;Acc:HGNC:5558]	-	3.16	1.81	0.567028	0.0990766	0.999904
ENSG00000131398	KCNC3	19	50311937	50333515	-	6277	protein_coding	potassium voltage-gated channel subfamily C member 3 [Source:HGNC Symbol;Acc:HGNC:6235]	-	2.76	2.18	0.352933	0.0991726	0.999904
ENSG00000260490	MYL12BP1	15	42571927	42572433	+	507	processed_pseudogene	myosin light chain 12B pseudogene 1 [Source:HGNC Symbol;Acc:HGNC:51649]	-	0.46	1.06	-0.602784	0.0992781	NA
ENSG00000152778	IFIT5	10	89414586	89421001	+	4015	protein_coding	interferon induced protein with tetratricopeptide repeats 5 [Source:HGNC Symbol;Acc:HGNC:13328]	-	8.21	10.48	-0.297649	0.0992949	0.999904
ENSG00000227776	AKR1D1P1	1	167519536	167520586	+	936	processed_pseudogene	aldo-keto reductase family 1 member D1 pseudogene 1 [Source:HGNC Symbol;Acc:HGNC:11288]	-	0.1	0.39	-0.548693	0.0993011	NA
ENSG00000115350	POLE4	2	74958492	74970128	+	2151	protein_coding	DNA polymerase epsilon 4, accessory subunit [Source:HGNC Symbol;Acc:HGNC:18755]	-	8.38	7.11	0.262161	0.0994222	0.999904
ENSG00000239906	AL627309.2	1	139790	140339	-	323	antisense	novel transcript	-	3.64	7.15	-0.578965	0.0995264	0.999904
ENSG00000095574	IKZF5	10	122990806	123008817	-	4934	protein_coding	IKAROS family zinc finger 5 [Source:HGNC Symbol;Acc:HGNC:14283]	Others	2.03	1.65	0.320772	0.0995274	0.999904
ENSG00000006282	SPATA20	17	50543058	50555852	+	5337	protein_coding	spermatogenesis associated 20 [Source:HGNC Symbol;Acc:HGNC:26125]	-	4.95	4.17	0.268401	0.0996056	0.999904
ENSG00000204305	AGER	6	32180968	32184324	-	2077	protein_coding	advanced glycosylation end-product specific receptor [Source:HGNC Symbol;Acc:HGNC:320]	-	25.4	20.27	0.340604	0.0997619	0.999904
ENSG00000255804	OR6J1	14	22630929	22644352	-	4165	protein_coding	olfactory receptor family 6 subfamily J member 1 (gene/pseudogene) [Source:HGNC Symbol;Acc:HGNC:14707]	-	0.21	0.09	0.602204	0.099773	0.999904
ENSG00000185684	EP400P1	12	132084283	132131639	+	12817	transcribed_unprocessed_pseudogene	EP400 pseudogene 1 [Source:HGNC Symbol;Acc:HGNC:26602]	-	1.71	1.44	0.275125	0.0998733	0.999904
ENSG00000144218	AFF3	2	99545419	100142739	-	12737	protein_coding	AF4/FMR2 family member 3 [Source:HGNC Symbol;Acc:HGNC:6473]	AF-4	2.23	2.68	-0.217755	0.100033	0.999904
ENSG00000198933	TBKBP1	17	47694081	47712050	+	4280	protein_coding	TBK1 binding protein 1 [Source:HGNC Symbol;Acc:HGNC:30140]	-	9.45	12.43	-0.322455	0.100056	0.999904
ENSG00000258130	AC106782.1	16	30204316	30209071	-	2707	transcribed_unprocessed_pseudogene	SAGA complex associated factor 29 pseudogene [Source:NCBI gene;Acc:613038]	-	0	0.07	-0.44558	0.100132	NA
ENSG00000133321	RARRES3	11	63536809	63546462	+	1299	protein_coding	retinoic acid receptor responder 3 [Source:HGNC Symbol;Acc:HGNC:9869]	-	34.77	46.7	-0.354222	0.100147	0.999904
ENSG00000231887	PRH1	12	10824960	11171608	-	3144	protein_coding	proline rich protein HaeIII subfamily 1 [Source:HGNC Symbol;Acc:HGNC:9366]	-	0.2	0.09	0.599762	0.100152	NA
ENSG00000198920	KIAA0753	17	6578148	6640927	-	6299	protein_coding	KIAA0753 [Source:HGNC Symbol;Acc:HGNC:29110]	-	4.66	3.76	0.326821	0.100171	0.999904
ENSG00000158748	HTR6	1	19665287	19679562	+	1984	protein_coding	5-hydroxytryptamine receptor 6 [Source:HGNC Symbol;Acc:HGNC:5301]	-	0.18	0.06	0.586682	0.100309	NA
ENSG00000125149	C16orf70	16	67109958	67148539	+	5965	protein_coding	chromosome 16 open reading frame 70 [Source:HGNC Symbol;Acc:HGNC:29564]	-	5.07	4.44	0.222197	0.100379	0.999904
ENSG00000188375	H3F3C	12	31791185	31792241	-	1057	protein_coding	H3 histone family member 3C [Source:HGNC Symbol;Acc:HGNC:33164]	-	0.73	1.29	-0.542078	0.100427	0.999904
ENSG00000248101	AC002116.1	19	36008638	36014235	-	1130	processed_transcript	novel transcript	-	0.11	0.01	0.439796	0.100449	NA
ENSG00000196975	ANXA4	2	69644425	69827100	+	11048	protein_coding	annexin A4 [Source:HGNC Symbol;Acc:HGNC:542]	-	3.88	4.75	-0.242644	0.100547	0.999904
ENSG00000141540	TTYH2	17	74213514	74262020	+	5375	protein_coding	tweety family member 2 [Source:HGNC Symbol;Acc:HGNC:13877]	-	3.74	2.91	0.359909	0.100552	0.999904
ENSG00000267547	AC060766.4	17	35403837	35404373	-	537	lincRNA	novel transcript	-	1.45	2.88	-0.584524	0.10061	0.999904
ENSG00000163597	SNHG16	17	76557766	76565348	+	5362	processed_transcript	small nucleolar RNA host gene 16 [Source:HGNC Symbol;Acc:HGNC:44352]	-	5.01	4.39	0.222735	0.10062	0.999904
ENSG00000124334	IL9R	X	155997581	156010817	+	2504	protein_coding	interleukin 9 receptor [Source:HGNC Symbol;Acc:HGNC:6030]	-	0.34	0.17	0.593152	0.100657	0.999904
ENSG00000165121	AL353743.1	9	85805359	85849542	+	2067	transcribed_unprocessed_pseudogene	kinesin family member 27 (KIF27) pseudogene	-	4.36	3.57	0.308264	0.100726	0.999904
ENSG00000165731	RET	10	43077027	43130351	+	6911	protein_coding	ret proto-oncogene [Source:HGNC Symbol;Acc:HGNC:9967]	-	0.09	0.16	-0.56019	0.10085	0.999904
ENSG00000161405	IKZF3	17	39757715	39864188	-	10008	protein_coding	IKAROS family zinc finger 3 [Source:HGNC Symbol;Acc:HGNC:13178]	zf-C2H2	16.58	21.38	-0.307691	0.100852	0.999904
ENSG00000081985	IL12RB2	1	67307364	67397090	+	4423	protein_coding	interleukin 12 receptor subunit beta 2 [Source:HGNC Symbol;Acc:HGNC:5972]	-	0.82	1.27	-0.474893	0.100857	0.999904
ENSG00000168487	BMP1	8	22164736	22212326	+	7471	protein_coding	bone morphogenetic protein 1 [Source:HGNC Symbol;Acc:HGNC:1067]	-	0.97	0.75	0.358845	0.100949	0.999904
ENSG00000234009	RPL5P34	22	42776406	42777296	-	891	processed_pseudogene	ribosomal protein L5 pseudogene 34 [Source:HGNC Symbol;Acc:HGNC:36463]	-	3.7	2.77	0.403446	0.101004	0.999904
ENSG00000176225	RTTN	18	70003031	70205945	-	19323	protein_coding	rotatin [Source:HGNC Symbol;Acc:HGNC:18654]	-	0.48	0.62	-0.300049	0.101056	0.999904
ENSG00000233609	RPL10P19	8	8961200	8979025	+	1442	transcribed_processed_pseudogene	ribosomal protein L10 pseudogene 19 [Source:HGNC Symbol;Acc:HGNC:52350]	-	3.1	4.18	-0.353574	0.101125	0.999904
ENSG00000069702	TGFBR3	1	91680343	91906335	-	8705	protein_coding	transforming growth factor beta receptor 3 [Source:HGNC Symbol;Acc:HGNC:11774]	-	5.53	7.87	-0.410776	0.101147	0.999904
ENSG00000128283	CDC42EP1	22	37560447	37569405	+	2573	protein_coding	CDC42 effector protein 1 [Source:HGNC Symbol;Acc:HGNC:17014]	-	1.71	1.32	0.372347	0.10123	0.999904
ENSG00000137504	CREBZF	11	85659708	85682908	-	5587	protein_coding	CREB/ATF bZIP transcription factor [Source:HGNC Symbol;Acc:HGNC:24905]	TF_bZIP	17.45	15.56	0.199925	0.101339	0.999904
ENSG00000139531	SUOX	12	55997180	56006641	+	5008	protein_coding	sulfite oxidase [Source:HGNC Symbol;Acc:HGNC:11460]	-	2.21	1.77	0.32955	0.101411	0.999904
ENSG00000103254	FAM173A	16	720581	722601	+	1923	protein_coding	family with sequence similarity 173 member A [Source:HGNC Symbol;Acc:HGNC:14152]	-	7.23	6.16	0.257224	0.101474	0.999904
ENSG00000205334	LINC01460	2	27705786	27715732	-	2860	lincRNA	long intergenic non-protein coding RNA 1460 [Source:HGNC Symbol;Acc:HGNC:50858]	-	0.03	0	0.396056	0.101486	NA
ENSG00000270773	AC137695.2	3	129345411	129346164	+	754	processed_pseudogene	MAP/microtubule affinity-regulating kinase 2, pseudogene	-	0.13	0	0.396056	0.101486	NA
ENSG00000233064	AL136307.1	6	5851506	5870220	+	411	lincRNA	novel transcript	-	0.04	0.42	-0.456771	0.101492	NA
ENSG00000004468	CD38	4	15778275	15853230	+	6855	protein_coding	CD38 molecule [Source:HGNC Symbol;Acc:HGNC:1667]	-	3.57	4.64	-0.320472	0.101581	0.999904
ENSG00000117600	PLPPR4	1	99263953	99309590	+	5540	protein_coding	phospholipid phosphatase related 4 [Source:HGNC Symbol;Acc:HGNC:23496]	-	0	0.05	-0.487257	0.1016	NA
ENSG00000282393	AC016588.2	19	248551	251571	-	3021	lincRNA	novel transcript	-	0.02	0.09	-0.530368	0.101685	NA
ENSG00000163512	AZI2	3	28315003	28349127	-	6349	protein_coding	5-azacytidine induced 2 [Source:HGNC Symbol;Acc:HGNC:24002]	-	3.57	3.05	0.258856	0.10177	0.999904
ENSG00000103966	EHD4	15	41895939	41972578	-	7879	protein_coding	EH domain containing 4 [Source:HGNC Symbol;Acc:HGNC:3245]	-	4.03	3.44	0.261963	0.101776	0.999904
ENSG00000070371	CLTCL1	22	19179473	19291716	-	10049	protein_coding	clathrin heavy chain like 1 [Source:HGNC Symbol;Acc:HGNC:2093]	-	0.99	0.79	0.328966	0.101796	0.999904
ENSG00000100300	TSPO	22	43151514	43163242	+	1455	protein_coding	translocator protein [Source:HGNC Symbol;Acc:HGNC:1158]	-	129.57	167.29	-0.306809	0.102124	0.999904
ENSG00000172543	CTSW	11	65879809	65883741	+	1719	protein_coding	cathepsin W [Source:HGNC Symbol;Acc:HGNC:2546]	-	75.56	109.14	-0.423537	0.102222	0.999904
ENSG00000135521	LTV1	6	143843344	143863812	+	1847	protein_coding	LTV1 ribosome biogenesis factor [Source:HGNC Symbol;Acc:HGNC:21173]	-	1.14	0.8	0.45059	0.102257	0.999904
ENSG00000139211	AMIGO2	12	47075707	47079951	-	3956	protein_coding	adhesion molecule with Ig like domain 2 [Source:HGNC Symbol;Acc:HGNC:24073]	-	2.59	3.32	-0.29733	0.102287	0.999904
ENSG00000156253	RWDD2B	21	29004384	29019378	-	3395	protein_coding	RWD domain containing 2B [Source:HGNC Symbol;Acc:HGNC:1302]	-	1.7	1.33	0.354109	0.102348	0.999904
ENSG00000159792	PSKH1	16	67893272	67929678	+	3977	protein_coding	protein serine kinase H1 [Source:HGNC Symbol;Acc:HGNC:9529]	-	4.6	3.97	0.24128	0.102411	0.999904
ENSG00000167774	AC010323.1	19	8308283	8321379	-	580	protein_coding	novel transcript	-	0.07	0.36	-0.519707	0.102424	NA
ENSG00000108395	TRIM37	17	58982638	59106921	-	5482	protein_coding	tripartite motif containing 37 [Source:HGNC Symbol;Acc:HGNC:7523]	-	2.86	3.51	-0.240314	0.102507	0.999904
ENSG00000238005	AL391832.2	1	234957342	234970062	-	1666	lincRNA	uncharacterized LOC101927851 [Source:NCBI gene;Acc:101927851]	-	4.39	3.3	0.398892	0.102511	0.999904
ENSG00000137103	TMEM8B	9	35814451	35865518	+	16165	protein_coding	transmembrane protein 8B [Source:HGNC Symbol;Acc:HGNC:21427]	-	0.89	0.72	0.314484	0.102632	0.999904
ENSG00000110931	CAMKK2	12	121237691	121298308	-	6931	protein_coding	calcium/calmodulin dependent protein kinase kinase 2 [Source:HGNC Symbol;Acc:HGNC:1470]	-	25.69	22.27	0.238957	0.10272	0.999904
ENSG00000163884	KLF15	3	126342635	126357442	-	2848	protein_coding	Kruppel like factor 15 [Source:HGNC Symbol;Acc:HGNC:14536]	zf-C2H2	0	0.03	-0.388908	0.102949	NA
ENSG00000078399	HOXA9	7	27162435	27175180	-	3029	protein_coding	homeobox A9 [Source:HGNC Symbol;Acc:HGNC:5109]	Homeobox	0.13	0.05	0.586001	0.102978	NA
ENSG00000272779	AC245060.4	22	22303224	22310401	+	1121	unprocessed_pseudogene	BMS1 homolog, ribosome assembly protein (yeast) (BSM1) pseudogene	-	16.33	13.99	0.253805	0.103069	0.999904
ENSG00000223960	AC009948.1	2	178413939	178440243	+	4001	antisense	uncharacterized LOC101927027 [Source:NCBI gene;Acc:101927027]	-	1.59	1.17	0.409085	0.103149	0.999904
ENSG00000173391	OLR1	12	10158301	10172138	-	3057	protein_coding	oxidized low density lipoprotein receptor 1 [Source:HGNC Symbol;Acc:HGNC:8133]	-	0.36	0.16	0.596279	0.103171	0.999904
ENSG00000213995	NAXD	13	110615460	110639993	+	2847	protein_coding	NAD(P)HX dehydratase [Source:HGNC Symbol;Acc:HGNC:25576]	-	11.17	9.59	0.248852	0.103173	0.999904
ENSG00000139714	MORN3	12	121648742	121672631	-	3856	protein_coding	MORN repeat containing 3 [Source:HGNC Symbol;Acc:HGNC:29807]	-	1.76	2.3	-0.313295	0.103364	0.999904
ENSG00000168916	ZNF608	5	124636913	124748807	-	6922	protein_coding	zinc finger protein 608 [Source:HGNC Symbol;Acc:HGNC:29238]	-	0.49	0.71	-0.4144	0.103459	0.999904
ENSG00000229337	AC079305.3	2	177155622	177212662	-	218	antisense	novel transcript	-	6.62	10.86	-0.512752	0.103475	0.999904
ENSG00000188811	NHLRC3	13	39038306	39050109	+	6409	protein_coding	NHL repeat containing 3 [Source:HGNC Symbol;Acc:HGNC:33751]	-	4.88	4.1	0.271436	0.103489	0.999904
ENSG00000174080	CTSF	11	66563463	66568841	-	2896	protein_coding	cathepsin F [Source:HGNC Symbol;Acc:HGNC:2531]	-	2.89	2.15	0.40548	0.103586	0.999904
ENSG00000188672	RHCE	1	25362249	25430192	-	2433	protein_coding	Rh blood group CcEe antigens [Source:HGNC Symbol;Acc:HGNC:10008]	-	0.76	0.52	0.475574	0.103602	0.999904
ENSG00000152556	PFKM	12	48105139	48146404	+	7318	protein_coding	phosphofructokinase, muscle [Source:HGNC Symbol;Acc:HGNC:8877]	-	1.55	1.31	0.266943	0.103663	0.999904
ENSG00000178104	PDE4DIP	1	148808181	149048286	+	27623	protein_coding	phosphodiesterase 4D interacting protein [Source:HGNC Symbol;Acc:HGNC:15580]	-	1.5	1.79	-0.209194	0.103682	0.999904
ENSG00000131584	ACAP3	1	1292376	1309609	-	8809	protein_coding	ArfGAP with coiled-coil, ankyrin repeat and PH domains 3 [Source:HGNC Symbol;Acc:HGNC:16754]	-	12.64	10.19	0.324926	0.103738	0.999904
ENSG00000166405	RIC3	11	8106093	8169055	-	7657	protein_coding	RIC3 acetylcholine receptor chaperone [Source:HGNC Symbol;Acc:HGNC:30338]	-	1.31	1.07	0.298179	0.103746	0.999904
ENSG00000196781	TLE1	9	81583683	81689305	-	4906	protein_coding	transducin like enhancer of split 1 [Source:HGNC Symbol;Acc:HGNC:11837]	-	2.3	3.33	-0.419197	0.103793	0.999904
ENSG00000163170	BOLA3	2	74135398	74147994	-	3156	protein_coding	bolA family member 3 [Source:HGNC Symbol;Acc:HGNC:24415]	-	0.7	1.11	-0.501274	0.103809	0.999904
ENSG00000259374	NDUFB4P11	14	103139675	103141959	+	2285	transcribed_processed_pseudogene	NADH:ubiquinone oxidoreductase subunit B4 pseudogene 11 [Source:HGNC Symbol;Acc:HGNC:45259]	-	0.06	0	0.389094	0.10383	NA
ENSG00000278847	AC006157.1	Y	2934406	2934771	-	366	lincRNA	novel transcript	-	0.37	0	0.389094	0.10383	NA
ENSG00000143995	MEIS1	2	66433452	66573869	+	10934	protein_coding	Meis homeobox 1 [Source:HGNC Symbol;Acc:HGNC:7000]	Homeobox	0.58	0.87	-0.446119	0.103883	0.999904
ENSG00000167216	KATNAL2	18	46917492	47102243	+	4783	protein_coding	katanin catalytic subunit A1 like 2 [Source:HGNC Symbol;Acc:HGNC:25387]	-	0.57	0.4	0.454633	0.103937	0.999904
ENSG00000115687	PASK	2	241106099	241150264	-	10686	protein_coding	PAS domain containing serine/threonine kinase [Source:HGNC Symbol;Acc:HGNC:17270]	-	3.18	2.64	0.291859	0.103958	0.999904
ENSG00000079263	SP140	2	230203110	230313215	+	5582	protein_coding	SP140 nuclear body protein [Source:HGNC Symbol;Acc:HGNC:17133]	SAND	9.85	12.22	-0.261277	0.103991	0.999904
ENSG00000226393	IFNA20P	9	21321300	21321827	+	528	unprocessed_pseudogene	interferon alpha 20, pseudogene [Source:HGNC Symbol;Acc:HGNC:5444]	-	0.4	0.99	-0.594218	0.104052	NA
ENSG00000106804	C5	9	120952335	121050276	-	6533	protein_coding	complement C5 [Source:HGNC Symbol;Acc:HGNC:1331]	-	0.68	0.53	0.361322	0.104151	0.999904
ENSG00000272666	U62317.1	22	50542305	50542906	-	602	lincRNA	novel transcript	-	1.93	1.15	0.548261	0.104203	0.999904
ENSG00000124564	SLC17A3	6	25833066	25882286	-	3594	protein_coding	solute carrier family 17 member 3 [Source:HGNC Symbol;Acc:HGNC:10931]	-	0.1	0.04	0.582798	0.10427	NA
ENSG00000014914	MTMR11	1	149928651	149936869	-	4562	protein_coding	myotubularin related protein 11 [Source:HGNC Symbol;Acc:HGNC:24307]	-	3.64	2.71	0.404309	0.104273	0.999904
ENSG00000130159	ECSIT	19	11505916	11529174	-	2370	protein_coding	ECSIT signalling integrator [Source:HGNC Symbol;Acc:HGNC:29548]	-	9.62	7.99	0.284414	0.104333	0.999904
ENSG00000283162	AL390726.6	9	38433696	38543880	+	2140	transcribed_unprocessed_pseudogene	STRA6-like (Stra6l) pseudogene	-	0	0.06	-0.38536	0.104401	NA
ENSG00000109113	RAB34	17	28714281	28718429	-	3325	protein_coding	RAB34, member RAS oncogene family [Source:HGNC Symbol;Acc:HGNC:16519]	-	3.35	2.35	0.451919	0.104473	0.999904
ENSG00000189350	TOGARAM2	2	28956611	29061373	+	19816	protein_coding	TOG array regulator of axonemal microtubules 2 [Source:HGNC Symbol;Acc:HGNC:33715]	-	0.76	1.05	-0.381565	0.104543	0.999904
ENSG00000198840	MT-ND3	MT	10059	10404	+	346	protein_coding	mitochondrially encoded NADH:ubiquinone oxidoreductase core subunit 3 [Source:HGNC Symbol;Acc:HGNC:7458]	-	1451.6	1296.9	0.199514	0.104575	0.999904
ENSG00000168517	HEXIM2	17	45160700	45170040	+	2038	protein_coding	hexamethylene bisacetamide inducible 2 [Source:HGNC Symbol;Acc:HGNC:28591]	-	0.61	1.01	-0.508272	0.104719	0.999904
ENSG00000100077	GRK3	22	25564849	25729294	+	9303	protein_coding	G protein-coupled receptor kinase 3 [Source:HGNC Symbol;Acc:HGNC:290]	-	9.69	8.37	0.242182	0.104879	0.999904
ENSG00000179833	SERTAD2	2	64631621	64751005	-	6274	protein_coding	SERTA domain containing 2 [Source:HGNC Symbol;Acc:HGNC:30784]	-	11.97	14.63	-0.233653	0.104908	0.999904
ENSG00000134153	EMC7	15	34084017	34101948	-	1538	protein_coding	ER membrane protein complex subunit 7 [Source:HGNC Symbol;Acc:HGNC:24301]	-	13.94	17.44	-0.264272	0.105005	0.999904
ENSG00000239736	CEACAMP3	19	41599735	41605984	+	1927	transcribed_unprocessed_pseudogene	carcinoembryonic antigen related cell adhesion molecule pseudogene 3 [Source:HGNC Symbol;Acc:HGNC:1825]	-	0.64	0.34	0.580968	0.105131	0.999904
ENSG00000153896	ZNF599	19	34758076	34773229	-	6796	protein_coding	zinc finger protein 599 [Source:HGNC Symbol;Acc:HGNC:26408]	zf-C2H2	0.44	0.64	-0.431521	0.105191	0.999904
ENSG00000119714	GPR68	14	91232532	91253925	-	3278	protein_coding	G protein-coupled receptor 68 [Source:HGNC Symbol;Acc:HGNC:4519]	-	10.02	12.91	-0.307525	0.105288	0.999904
ENSG00000140307	GTF2A2	15	59638062	59657541	-	3204	protein_coding	general transcription factor IIA subunit 2 [Source:HGNC Symbol;Acc:HGNC:4647]	-	0.32	0.18	0.567169	0.1053	0.999904
ENSG00000099840	IZUMO4	19	2096429	2099593	+	2770	protein_coding	IZUMO family member 4 [Source:HGNC Symbol;Acc:HGNC:26950]	-	2.34	1.85	0.345883	0.105373	0.999904
ENSG00000188033	ZNF490	19	12577961	12640098	-	4921	protein_coding	zinc finger protein 490 [Source:HGNC Symbol;Acc:HGNC:23705]	zf-C2H2	0.79	0.6	0.381333	0.105394	0.999904
ENSG00000103723	AP3B2	15	82659281	82709914	-	9108	protein_coding	adaptor related protein complex 3 subunit beta 2 [Source:HGNC Symbol;Acc:HGNC:567]	-	0.01	0.03	-0.580419	0.105528	NA
ENSG00000048471	SNX29	16	11976737	12574289	+	11298	protein_coding	sorting nexin 29 [Source:HGNC Symbol;Acc:HGNC:30542]	-	1.61	1.36	0.266733	0.10558	0.999904
ENSG00000214595	EML6	2	54723499	54972025	+	14426	protein_coding	echinoderm microtubule associated protein like 6 [Source:HGNC Symbol;Acc:HGNC:35412]	-	0.76	0.59	0.367846	0.105807	0.999904
ENSG00000234911	TEX21P	14	64341673	64387986	-	3162	transcribed_unitary_pseudogene	testis expressed 21, pseudogene [Source:HGNC Symbol;Acc:HGNC:35455]	-	1.37	1.82	-0.341945	0.105879	0.999904
ENSG00000153162	BMP6	6	7726797	7881422	+	2780	protein_coding	bone morphogenetic protein 6 [Source:HGNC Symbol;Acc:HGNC:1073]	-	4.28	5.64	-0.32019	0.105935	0.999904
ENSG00000259349	AC011921.1	17	60526293	60550798	+	718	antisense	novel transcript, antisense to APPBP2	-	1.11	0.53	0.590753	0.105939	0.999904
ENSG00000273723	AL139089.1	13	52651305	52652279	-	975	lincRNA	novel transcript	-	1.15	0.66	0.552857	0.106094	0.999904
ENSG00000107957	SH3PXD2A	10	103594027	103855543	-	11756	protein_coding	SH3 and PX domains 2A [Source:HGNC Symbol;Acc:HGNC:23664]	-	1.95	1.66	0.261773	0.106094	0.999904
ENSG00000282173	TRBJ1-5	7	142788498	142788547	+	50	TR_J_gene	T cell receptor beta joining 1-5 [Source:HGNC Symbol;Acc:HGNC:12166]	-	66.56	48.39	0.427788	0.106105	0.999904
ENSG00000256269	HMBS	11	119084866	119093549	+	4927	protein_coding	hydroxymethylbilane synthase [Source:HGNC Symbol;Acc:HGNC:4982]	-	1.92	1.49	0.357989	0.106131	0.999904
ENSG00000250195	AC109927.1	4	138819954	139012646	-	664	antisense	uncharacterized LOC105377448 [Source:NCBI gene;Acc:105377448]	-	3.59	2.5	0.457466	0.106155	0.999904
ENSG00000078043	PIAS2	18	46803224	46920160	-	17527	protein_coding	protein inhibitor of activated STAT 2 [Source:HGNC Symbol;Acc:HGNC:17311]	zf-MIZ	1.08	0.91	0.274337	0.106169	0.999904
ENSG00000153157	SYCP2L	6	10886831	10979320	+	3962	protein_coding	synaptonemal complex protein 2 like [Source:HGNC Symbol;Acc:HGNC:21537]	-	0.55	0.28	0.584258	0.106267	0.999904
ENSG00000278719	MCM8-AS1	20	5990943	6005821	-	983	antisense	MCM8 antisense RNA 1 [Source:HGNC Symbol;Acc:HGNC:51230]	-	0.64	1.22	-0.562854	0.106312	0.999904
ENSG00000108960	MMD	17	55392613	55421992	-	3270	protein_coding	monocyte to macrophage differentiation associated [Source:HGNC Symbol;Acc:HGNC:7153]	-	17.58	23.3	-0.327803	0.106392	0.999904
ENSG00000111276	CDKN1B	12	12715058	12722371	+	2811	protein_coding	cyclin dependent kinase inhibitor 1B [Source:HGNC Symbol;Acc:HGNC:1785]	-	65.56	80.46	-0.238539	0.10641	0.999904
ENSG00000173699	SPATA3	2	230990324	231025055	+	2856	protein_coding	spermatogenesis associated 3 [Source:HGNC Symbol;Acc:HGNC:17884]	-	0.01	0.08	-0.465629	0.106417	NA
ENSG00000181409	AATK	17	81117295	81166077	-	6225	protein_coding	apoptosis associated tyrosine kinase [Source:HGNC Symbol;Acc:HGNC:21]	-	32.78	25.39	0.374761	0.106445	0.999904
ENSG00000227678	AL355581.1	6	130133410	130146179	-	2906	antisense	novel transcript, antisense to L3MBTL3	-	0.37	0.61	-0.509242	0.106485	0.999904
ENSG00000231205	ZNF826P	19	20340269	20424969	-	6008	transcribed_unprocessed_pseudogene	zinc finger protein 826, pseudogene [Source:HGNC Symbol;Acc:HGNC:33875]	-	0.36	0.52	-0.418063	0.106599	0.999904
ENSG00000037757	MRI1	19	13764532	13774282	+	3456	protein_coding	methylthioribose-1-phosphate isomerase 1 [Source:HGNC Symbol;Acc:HGNC:28469]	-	5.02	4.07	0.312727	0.106769	0.999904
ENSG00000255229	AC069287.3	11	129279	186136	+	589	antisense	novel transcript, antisense to BET1L	-	9.3	6.4	0.473068	0.106938	0.999904
ENSG00000185905	C16orf54	16	29742463	29746006	-	2585	protein_coding	chromosome 16 open reading frame 54 [Source:HGNC Symbol;Acc:HGNC:26649]	-	93.22	113.46	-0.228453	0.10695	0.999904
ENSG00000254739	AC137894.1	11	528907	529659	+	547	antisense	novel transcript	-	0.72	0.26	0.577212	0.106962	NA
ENSG00000167552	TUBA1A	12	49184796	49189324	-	3421	protein_coding	tubulin alpha 1a [Source:HGNC Symbol;Acc:HGNC:20766]	-	71.95	96.21	-0.335592	0.107052	0.999904
ENSG00000233822	HIST1H2BN	6	27837760	27865798	+	5477	protein_coding	histone cluster 1 H2B family member n [Source:HGNC Symbol;Acc:HGNC:4749]	-	0.31	0.57	-0.557679	0.107054	0.999904
ENSG00000172260	NEGR1	1	71395940	72282734	-	13406	protein_coding	neuronal growth regulator 1 [Source:HGNC Symbol;Acc:HGNC:17302]	-	0.03	0.01	0.586105	0.107086	NA
ENSG00000181143	MUC16	19	8848844	8981342	-	43830	protein_coding	mucin 16, cell surface associated [Source:HGNC Symbol;Acc:HGNC:15582]	-	0.01	0.01	-0.588184	0.107086	0.999904
ENSG00000267130	AC008738.2	19	33305036	33309387	+	404	lincRNA	novel transcript	-	1.48	0.63	0.588425	0.107096	NA
ENSG00000112038	OPRM1	6	154010496	154246867	+	8135	protein_coding	opioid receptor mu 1 [Source:HGNC Symbol;Acc:HGNC:8156]	-	0.05	0.02	0.584176	0.107118	NA
ENSG00000075945	KIFAP3	1	169921326	170085208	-	4978	protein_coding	kinesin associated protein 3 [Source:HGNC Symbol;Acc:HGNC:17060]	-	2.77	3.67	-0.337782	0.107156	0.999904
ENSG00000171606	ZNF274	19	58183029	58213562	+	8333	protein_coding	zinc finger protein 274 [Source:HGNC Symbol;Acc:HGNC:13068]	zf-C2H2	4.69	5.58	-0.203708	0.107236	0.999904
ENSG00000169884	WNT10B	12	48965340	48971763	-	2629	protein_coding	Wnt family member 10B [Source:HGNC Symbol;Acc:HGNC:12775]	-	2.04	1.5	0.4114	0.107273	0.999904
ENSG00000196092	PAX5	9	36833275	37034185	-	9333	protein_coding	paired box 5 [Source:HGNC Symbol;Acc:HGNC:8619]	PAX	5.91	7.02	-0.202197	0.107368	0.999904
ENSG00000260256	AP001063.1	21	44347767	44348295	-	529	lincRNA	novel transcript	-	0.35	0.04	0.446692	0.107602	NA
ENSG00000214851	LINC00612	12	9055586	9065070	-	2213	processed_transcript	long intergenic non-protein coding RNA 612 [Source:HGNC Symbol;Acc:HGNC:28621]	-	1.03	1.68	-0.505094	0.10765	0.999904
ENSG00000235912	AL031729.1	1	27649419	27649610	+	192	processed_pseudogene	novel pseudogene	-	3.49	6.06	-0.533882	0.107712	0.999904
ENSG00000211689	TRGC1	7	38257879	38265678	-	2730	TR_C_gene	T cell receptor gamma constant 1 [Source:HGNC Symbol;Acc:HGNC:12275]	-	7.25	10.32	-0.411137	0.107881	0.999904
ENSG00000136999	NOV	8	119416306	119424353	+	2673	protein_coding	nephroblastoma overexpressed [Source:HGNC Symbol;Acc:HGNC:7885]	-	1.52	2.14	-0.392293	0.107889	0.999904
ENSG00000135678	CPM	12	68842197	68971570	-	7535	protein_coding	carboxypeptidase M [Source:HGNC Symbol;Acc:HGNC:2311]	-	0.72	0.55	0.370682	0.107993	0.999904
ENSG00000273003	ARL2-SNX15	11	65014182	65040570	+	2392	protein_coding	ARL2-SNX15 readthrough (NMD candidate) [Source:HGNC Symbol;Acc:HGNC:49197]	-	0.02	0.09	-0.525931	0.108036	NA
ENSG00000171603	CLSTN1	1	9729026	9824526	-	5683	protein_coding	calsyntenin 1 [Source:HGNC Symbol;Acc:HGNC:17447]	-	23.82	29.79	-0.271404	0.108154	0.999904
ENSG00000068078	FGFR3	4	1793293	1808872	+	4848	protein_coding	fibroblast growth factor receptor 3 [Source:HGNC Symbol;Acc:HGNC:3690]	-	0.03	0	0.454106	0.108239	NA
ENSG00000135185	TMEM243	7	87196160	87220587	-	3271	protein_coding	transmembrane protein 243 [Source:HGNC Symbol;Acc:HGNC:21707]	-	8.31	7.16	0.244788	0.108239	0.999904
ENSG00000259704	AC124248.1	15	90839724	90841378	+	402	sense_overlapping	novel transcript, sense overlapping 3' UTR of BLM	-	2.09	1.16	0.562789	0.108256	0.999904
ENSG00000196155	PLEKHG4	16	67277510	67289499	+	7328	protein_coding	pleckstrin homology and RhoGEF domain containing G4 [Source:HGNC Symbol;Acc:HGNC:24501]	-	1.47	1.16	0.338943	0.108329	0.999904
ENSG00000225883	BMS1P11	9	64705734	64709311	-	885	unprocessed_pseudogene	BMS1, ribosome biogenesis factor pseudogene 11 [Source:HGNC Symbol;Acc:HGNC:49156]	-	0.04	0.21	-0.516559	0.108438	NA
ENSG00000164483	SAMD3	6	130144315	130365425	-	6903	protein_coding	sterile alpha motif domain containing 3 [Source:HGNC Symbol;Acc:HGNC:21574]	-	7.86	10.47	-0.342507	0.108446	0.999904
ENSG00000274615	AC233968.1	17	38078262	38124770	+	1300	unprocessed_pseudogene	aminopeptidase puromycin sensitive pseudogene [Source:NCBI gene;Acc:440434]	-	2.47	1.66	0.481206	0.108472	0.999904
ENSG00000134490	TMEM241	18	23197144	23437961	-	5193	protein_coding	transmembrane protein 241 [Source:HGNC Symbol;Acc:HGNC:31723]	-	0.71	0.96	-0.343629	0.108532	0.999904
ENSG00000282995	FRG1EP	20	29480147	29497179	-	770	unprocessed_pseudogene	FSHD region gene 1 family member E, pseudogene [Source:HGNC Symbol;Acc:HGNC:51764]	-	0.47	0.15	0.562462	0.108564	NA
ENSG00000069696	DRD4	11	637293	640706	+	1477	protein_coding	dopamine receptor D4 [Source:HGNC Symbol;Acc:HGNC:3025]	-	0.61	1.01	-0.509489	0.108603	0.999904
ENSG00000153823	PID1	2	228850526	229271285	-	3364	protein_coding	phosphotyrosine interaction domain containing 1 [Source:HGNC Symbol;Acc:HGNC:26084]	-	4.54	3.58	0.349374	0.108686	0.999904
ENSG00000231772	Z93403.1	X	42252459	42699385	+	1308	lincRNA	novel transcript	-	0.08	0	0.382419	0.108692	NA
ENSG00000183971	NPW	16	2009926	2020755	+	1168	protein_coding	neuropeptide W [Source:HGNC Symbol;Acc:HGNC:30509]	-	0.22	0.03	0.471813	0.108705	NA
ENSG00000279727	LINC02033	3	36819276	36822498	-	1344	lincRNA	long intergenic non-protein coding RNA 2033 [Source:HGNC Symbol;Acc:HGNC:52867]	-	0.91	0.57	0.524882	0.108747	0.999904
ENSG00000278959	AC006378.2	7	93954044	93956519	-	2476	TEC	tec	-	0.2	0.37	-0.55697	0.108779	0.999904
ENSG00000196363	WDR5	9	134135365	134159968	+	3629	protein_coding	WD repeat domain 5 [Source:HGNC Symbol;Acc:HGNC:12757]	-	10.91	9.56	0.225304	0.108877	0.999904
ENSG00000261363	AC106745.1	16	87066705	87069752	+	464	lincRNA	novel transcript	-	0.1	0.63	-0.479281	0.108952	NA
ENSG00000188290	HES4	1	998962	1000172	-	1118	protein_coding	hes family bHLH transcription factor 4 [Source:HGNC Symbol;Acc:HGNC:24149]	bHLH	2.29	3.82	-0.519067	0.108957	0.999904
ENSG00000185896	LAMP1	13	113297241	113323672	+	5739	protein_coding	lysosomal associated membrane protein 1 [Source:HGNC Symbol;Acc:HGNC:6499]	-	42.17	51.02	-0.220958	0.109016	0.999904
ENSG00000138378	STAT4	2	191029576	191151596	-	4785	protein_coding	signal transducer and activator of transcription 4 [Source:HGNC Symbol;Acc:HGNC:11365]	STAT	6.81	9.11	-0.348974	0.109222	0.999904
ENSG00000273118	AC093865.1	2	212581357	213021545	-	433	sense_overlapping	novel transcript, sense overlapping IKZF2	-	5.32	8.15	-0.462138	0.109286	0.999904
ENSG00000226471	Z93930.2	22	28800683	28848559	+	1470	antisense	novel transcript	-	3.3	2.61	0.343529	0.109337	0.999904
ENSG00000111252	SH2B3	12	111405948	111451623	+	5682	protein_coding	SH2B adaptor protein 3 [Source:HGNC Symbol;Acc:HGNC:29605]	-	7.76	6.42	0.299113	0.109353	0.999904
ENSG00000281392	LINC00506	3	87089129	87157069	+	5011	lincRNA	long intergenic non-protein coding RNA 506 [Source:NCBI gene;Acc:100846978]	-	0	0.03	-0.44045	0.109407	NA
ENSG00000188234	AGAP4	10	45825594	45853875	-	3474	protein_coding	ArfGAP with GTPase domain, ankyrin repeat and PH domain 4 [Source:HGNC Symbol;Acc:HGNC:23459]	-	7.84	6.76	0.243129	0.109511	0.999904
ENSG00000181381	DDX60L	4	168356735	168537786	-	12156	protein_coding	DExD/H-box 60 like [Source:HGNC Symbol;Acc:HGNC:26429]	-	19.06	24.46	-0.295946	0.109519	0.999904
ENSG00000143110	C1orf162	1	111473792	111478512	+	2768	protein_coding	chromosome 1 open reading frame 162 [Source:HGNC Symbol;Acc:HGNC:28344]	-	29.18	24.46	0.274737	0.109546	0.999904
ENSG00000243902	ELFN2	22	37339583	37427445	-	2118	sense_overlapping	extracellular leucine rich repeat and fibronectin type III domain containing 2 [Source:NCBI gene;Acc:114794]	-	0.01	0.07	-0.441474	0.109624	NA
ENSG00000101079	NDRG3	20	36651766	36746078	-	3248	protein_coding	NDRG family member 3 [Source:HGNC Symbol;Acc:HGNC:14462]	-	14.07	16.8	-0.209754	0.109652	0.999904
ENSG00000176182	MYPOP	19	45890020	45902604	-	1890	protein_coding	Myb related transcription factor, partner of profilin [Source:HGNC Symbol;Acc:HGNC:20178]	-	8.38	7.08	0.270489	0.109666	0.999904
ENSG00000257335	MGAM	7	141907813	142106747	+	10767	protein_coding	maltase-glucoamylase [Source:HGNC Symbol;Acc:HGNC:7043]	-	35.75	53.15	-0.429234	0.109729	0.999904
ENSG00000198502	HLA-DRB5	6	32517343	32530287	-	1260	protein_coding	major histocompatibility complex, class II, DR beta 5 [Source:HGNC Symbol;Acc:HGNC:4953]	-	144.46	220.23	-0.468399	0.109853	0.999904
ENSG00000188937	NYX	X	41447434	41475710	+	2988	protein_coding	nyctalopin [Source:HGNC Symbol;Acc:HGNC:8082]	-	0	0.03	-0.375949	0.10994	NA
ENSG00000129518	EAPP	14	34515929	34539711	-	2030	protein_coding	E2F associated phosphoprotein [Source:HGNC Symbol;Acc:HGNC:19312]	-	17.26	20.66	-0.211312	0.110019	0.999904
ENSG00000244300	GATA2-AS1	3	128489212	128502348	+	2283	antisense	GATA2 antisense RNA 1 [Source:HGNC Symbol;Acc:HGNC:51108]	-	0.05	0.17	-0.559442	0.110059	NA
ENSG00000164924	YWHAZ	8	100916525	100953388	-	8555	protein_coding	tyrosine 3-monooxygenase/tryptophan 5-monooxygenase activation protein zeta [Source:HGNC Symbol;Acc:HGNC:12855]	-	86.19	105.57	-0.23611	0.110104	0.999904
ENSG00000162946	DISC1	1	231626815	232041272	+	12906	protein_coding	DISC1 scaffold protein [Source:HGNC Symbol;Acc:HGNC:2888]	-	2.14	1.74	0.313816	0.11026	0.999904
ENSG00000116990	MYCL	1	39895426	39902256	-	5063	protein_coding	MYCL proto-oncogene, bHLH transcription factor [Source:HGNC Symbol;Acc:HGNC:7555]	bHLH	5.96	4.96	0.285571	0.110392	0.999904
ENSG00000149782	PLCB3	11	64251523	64269150	+	4964	protein_coding	phospholipase C beta 3 [Source:HGNC Symbol;Acc:HGNC:9056]	-	5.07	4.14	0.311028	0.110403	0.999904
ENSG00000145685	LHFPL2	5	78485215	78770021	-	7977	protein_coding	LHFPL tetraspan subfamily member 2 [Source:HGNC Symbol;Acc:HGNC:6588]	-	2.3	1.85	0.325622	0.110508	0.999904
ENSG00000140400	MAN2C1	15	75355207	75368630	-	9142	protein_coding	mannosidase alpha class 2C member 1 [Source:HGNC Symbol;Acc:HGNC:6827]	-	10.85	9.05	0.281117	0.110533	0.999904
ENSG00000124568	SLC17A1	6	25782897	25832059	-	2044	protein_coding	solute carrier family 17 member 1 [Source:HGNC Symbol;Acc:HGNC:10929]	-	0.13	0.04	0.536287	0.110542	NA
ENSG00000189051	RNF222	17	8390704	8397826	-	3070	protein_coding	ring finger protein 222 [Source:HGNC Symbol;Acc:HGNC:34517]	-	0.04	0.12	-0.574488	0.110578	NA
ENSG00000175866	BAIAP2	17	81035122	81117432	+	10288	protein_coding	BAI1 associated protein 2 [Source:HGNC Symbol;Acc:HGNC:947]	-	1.8	2.39	-0.33065	0.110598	0.999904
ENSG00000158623	COPG2	7	130506238	130668748	-	4139	protein_coding	coatomer protein complex subunit gamma 2 [Source:HGNC Symbol;Acc:HGNC:2237]	-	2.91	2.33	0.328271	0.110663	0.999904
ENSG00000205085	FAM71F2	7	128672288	128687872	+	5875	protein_coding	family with sequence similarity 71 member F2 [Source:HGNC Symbol;Acc:HGNC:27998]	-	0.76	1	-0.333887	0.11089	0.999904
ENSG00000255292	AP002884.3	11	112086903	112193805	+	1190	protein_coding	novel transcript	-	0.99	0.57	0.549805	0.110915	0.999904
ENSG00000112312	GMNN	6	24774931	24786099	+	2476	protein_coding	geminin, DNA replication inhibitor [Source:HGNC Symbol;Acc:HGNC:17493]	-	2	1.56	0.359429	0.111027	0.999904
ENSG00000250349	AF241726.2	X	37349330	38687674	+	954	protein_coding	novel proline rich Gla (G-carboxyglutamic acid) 1 (PRRG1) and tetraspanin 7 (TSPAN7) protein	-	1.53	0.84	0.560356	0.111074	0.999904
ENSG00000260661	AC116903.2	15	92148752	92331037	-	1304	antisense	novel transcript, antisense to SLCO3A1	-	0.54	0.26	0.580579	0.111111	0.999904
ENSG00000152377	SPOCK1	5	136975298	137598379	-	6222	protein_coding	SPARC (osteonectin), cwcv and kazal like domains proteoglycan 1 [Source:HGNC Symbol;Acc:HGNC:11251]	-	0.23	0.14	0.533642	0.111129	0.999904
ENSG00000196230	TUBB	6	30720201	30725426	+	3359	protein_coding	tubulin beta class I [Source:HGNC Symbol;Acc:HGNC:20778]	-	33.99	42.96	-0.281469	0.111186	0.999904
ENSG00000070388	FGF22	19	639879	644371	+	2778	protein_coding	fibroblast growth factor 22 [Source:HGNC Symbol;Acc:HGNC:3679]	-	0.18	0.08	0.582004	0.111275	NA
ENSG00000138166	DUSP5	10	110497838	110511544	+	2615	protein_coding	dual specificity phosphatase 5 [Source:HGNC Symbol;Acc:HGNC:3071]	-	4.76	6.87	-0.422139	0.111353	0.999904
ENSG00000175691	ZNF77	19	2933218	2944971	-	2437	protein_coding	zinc finger protein 77 [Source:HGNC Symbol;Acc:HGNC:13150]	zf-C2H2	0.87	1.32	-0.452648	0.111435	0.999904
ENSG00000177822	AC098864.1	4	181874438	182145249	-	5551	antisense	uncharacterized LOC90768 [Source:NCBI gene;Acc:90768]	-	0.02	0	0.377162	0.111448	NA
ENSG00000017483	SLC38A5	X	48458537	48470256	-	4014	protein_coding	solute carrier family 38 member 5 [Source:HGNC Symbol;Acc:HGNC:18070]	-	13.49	10.53	0.347171	0.111498	0.999904
ENSG00000130414	NDUFA10	2	239892450	240025402	-	9517	protein_coding	NADH:ubiquinone oxidoreductase subunit A10 [Source:HGNC Symbol;Acc:HGNC:7684]	-	7.61	6.77	0.203372	0.111603	0.999904
ENSG00000154310	TNIK	3	171061339	171460408	-	8523	protein_coding	TRAF2 and NCK interacting kinase [Source:HGNC Symbol;Acc:HGNC:30765]	-	5	6.37	-0.290687	0.1118	0.999904
ENSG00000102109	PCSK1N	X	48831094	48835633	-	1363	protein_coding	proprotein convertase subtilisin/kexin type 1 inhibitor [Source:HGNC Symbol;Acc:HGNC:17301]	-	6.2	3.6	0.542349	0.111872	0.999904
ENSG00000182048	TRPC2	11	3609901	3637559	+	3262	transcribed_unprocessed_pseudogene	transient receptor potential cation channel subfamily C member 2 (pseudogene) [Source:HGNC Symbol;Acc:HGNC:12334]	-	0.5	0.31	0.530607	0.111913	0.999904
ENSG00000155100	OTUD6B	8	91070196	91087095	+	3977	protein_coding	OTU domain containing 6B [Source:HGNC Symbol;Acc:HGNC:24281]	-	2.58	2.17	0.274881	0.11198	0.999904
ENSG00000236469	AC007881.2	2	71002531	71064743	-	570	antisense	novel transcript, antisense to NAGK	-	1.05	0.49	0.581302	0.111988	NA
ENSG00000165406	43898	10	45454585	45594906	-	7539	protein_coding	membrane associated ring-CH-type finger 8 [Source:HGNC Symbol;Acc:HGNC:23356]	-	18.69	22.47	-0.215353	0.112	0.999904
ENSG00000280011	AL031595.2	22	44210442	44229512	-	19071	antisense	novel transcript, antisense to PARVG	-	0	0.02	-0.567206	0.112149	NA
ENSG00000233755	AL050344.1	1	25043707	25113120	-	863	lincRNA	novel transcript	-	1.58	2.95	-0.559664	0.11226	0.999904
ENSG00000179388	EGR3	8	22687659	22693302	-	4855	protein_coding	early growth response 3 [Source:HGNC Symbol;Acc:HGNC:3240]	zf-C2H2	0.1	0.2	-0.569885	0.112444	0.999904
ENSG00000218537	MIF-AS1	22	23894426	23898930	-	1476	antisense	MIF antisense RNA 1 [Source:HGNC Symbol;Acc:HGNC:27669]	-	1.56	2.21	-0.396781	0.11261	0.999904
ENSG00000164077	MON1A	3	49907160	49930173	-	6446	protein_coding	MON1 homolog A, secretory trafficking associated [Source:HGNC Symbol;Acc:HGNC:28207]	-	0.2	0.12	0.523606	0.112625	0.999904
ENSG00000181036	FCRL6	1	159800511	159816251	+	2671	protein_coding	Fc receptor like 6 [Source:HGNC Symbol;Acc:HGNC:31910]	-	24.3	32.01	-0.332285	0.112643	0.999904
ENSG00000225465	RFPL1S	22	29436534	29478175	-	6271	antisense	RFPL1 antisense RNA 1 [Source:HGNC Symbol;Acc:HGNC:9978]	-	0.12	0.07	0.553056	0.112671	0.999904
ENSG00000236778	INTS6-AS1	13	51452367	51552364	+	9866	antisense	INTS6 antisense RNA 1 [Source:HGNC Symbol;Acc:HGNC:42691]	-	0.31	0.23	0.410132	0.112796	0.999904
ENSG00000136960	ENPP2	8	119557086	119673453	-	6729	protein_coding	ectonucleotide pyrophosphatase/phosphodiesterase 2 [Source:HGNC Symbol;Acc:HGNC:3357]	-	0.24	0.36	-0.450496	0.112809	0.999904
ENSG00000256673	AC141557.1	12	9398355	9414851	-	400	unprocessed_pseudogene	ovostatin (OVOS) pseudogene	-	5.07	7.31	-0.414347	0.112823	0.999904
ENSG00000034677	RNF19A	8	100257060	100336218	-	6031	protein_coding	ring finger protein 19A, RBR E3 ubiquitin protein ligase [Source:HGNC Symbol;Acc:HGNC:13432]	-	7.92	9.38	-0.198684	0.112838	0.999904
ENSG00000154589	LY96	8	73991352	74029087	+	607	protein_coding	lymphocyte antigen 96 [Source:HGNC Symbol;Acc:HGNC:17156]	-	52.16	67.72	-0.312599	0.113099	0.999904
ENSG00000249574	AC226118.1	7	379359	382712	+	2146	lincRNA	uncharacterized LOC442497 [Source:NCBI gene;Acc:442497]	-	0.07	0.01	0.445173	0.113124	NA
ENSG00000168350	DEGS2	14	100143957	100160163	-	4466	protein_coding	delta 4-desaturase, sphingolipid 2 [Source:HGNC Symbol;Acc:HGNC:20113]	-	0.32	0.52	-0.495776	0.113141	0.999904
ENSG00000084710	EFR3B	2	25042130	25159137	+	10591	protein_coding	EFR3 homolog B [Source:HGNC Symbol;Acc:HGNC:29155]	-	0.08	0.04	0.560016	0.113185	0.999904
ENSG00000258234	AC024257.1	12	48231098	48284210	-	566	lincRNA	novel transcript	-	2.37	1.36	0.552001	0.113204	0.999904
ENSG00000235989	MORC2-AS1	22	30922308	30932449	+	2695	antisense	MORC2 antisense RNA 1 [Source:HGNC Symbol;Acc:HGNC:26662]	-	0.1	0.21	-0.576392	0.113364	NA
ENSG00000069188	SDK2	17	73334384	73644089	-	11607	protein_coding	sidekick cell adhesion molecule 2 [Source:HGNC Symbol;Acc:HGNC:19308]	-	0.27	0.4	-0.429376	0.113456	0.999904
ENSG00000268433	MTDHP3	19	21677550	21678221	-	672	processed_pseudogene	metadherin pseudogene 3 [Source:HGNC Symbol;Acc:HGNC:52359]	-	0.23	1.54	-0.460053	0.113545	0.999904
ENSG00000238122	AL359258.1	1	108261196	108273689	-	2481	lincRNA	novel transcript	-	0.06	0	0.441201	0.113569	NA
ENSG00000155463	OXA1L	14	22766522	22773041	+	4497	protein_coding	OXA1L, mitochondrial inner membrane protein [Source:HGNC Symbol;Acc:HGNC:8526]	-	21.85	18.79	0.243711	0.113575	0.999904
ENSG00000111666	CHPT1	12	101696947	101744140	+	6004	protein_coding	choline phosphotransferase 1 [Source:HGNC Symbol;Acc:HGNC:17852]	-	6.21	5.13	0.289317	0.113618	0.999904
ENSG00000234884	AL022329.1	22	25561117	25564462	-	939	antisense	novel transcript	-	0	0.1	-0.369753	0.113819	NA
ENSG00000136689	IL1RN	2	113107214	113134016	+	3256	protein_coding	interleukin 1 receptor antagonist [Source:HGNC Symbol;Acc:HGNC:6000]	-	22.18	29.51	-0.331262	0.113915	0.999904
ENSG00000134056	MRPS36	5	69217760	69230129	+	1530	protein_coding	mitochondrial ribosomal protein S36 [Source:HGNC Symbol;Acc:HGNC:16631]	-	5.57	7.15	-0.298866	0.114037	0.999904
ENSG00000274512	TBC1D3L	17	37977972	37989048	-	2248	protein_coding	TBC1 domain family member 3L [Source:HGNC Symbol;Acc:HGNC:51246]	-	2.35	4.38	-0.55321	0.114041	0.999904
ENSG00000234965	SHISA8	22	41909554	41914667	-	1405	protein_coding	shisa family member 8 [Source:HGNC Symbol;Acc:HGNC:18351]	-	1.65	2.63	-0.489541	0.114149	0.999904
ENSG00000136108	CKAP2	13	52455429	52476628	+	4547	protein_coding	cytoskeleton associated protein 2 [Source:HGNC Symbol;Acc:HGNC:1990]	-	3.51	3	0.252189	0.114164	0.999904
ENSG00000167291	TBC1D16	17	79932343	80035848	-	11555	protein_coding	TBC1 domain family member 16 [Source:HGNC Symbol;Acc:HGNC:28356]	-	0.84	0.54	0.514899	0.114195	0.999904
ENSG00000213096	ZNF254	19	24033405	24129961	+	7602	protein_coding	zinc finger protein 254 [Source:HGNC Symbol;Acc:HGNC:13047]	zf-C2H2	1.98	2.43	-0.240755	0.11424	0.999904
ENSG00000204677	FAM153C	5	178006405	178055559	+	4285	protein_coding	family with sequence similarity 153 member C [Source:HGNC Symbol;Acc:HGNC:33936]	-	0.97	0.6	0.514718	0.114451	0.999904
ENSG00000166002	SMCO4	11	93478472	93543508	-	1223	protein_coding	single-pass membrane protein with coiled-coil domains 4 [Source:HGNC Symbol;Acc:HGNC:24810]	-	14.26	10.97	0.369335	0.114487	0.999904
ENSG00000137822	TUBGCP4	15	43369221	43409771	+	11171	protein_coding	tubulin gamma complex associated protein 4 [Source:HGNC Symbol;Acc:HGNC:16691]	-	0.68	0.54	0.334984	0.114563	0.999904
ENSG00000090975	PITPNM2	12	122983480	123150015	-	9161	protein_coding	phosphatidylinositol transfer protein membrane associated 2 [Source:HGNC Symbol;Acc:HGNC:21044]	-	4.37	5.96	-0.357688	0.114717	0.999904
ENSG00000173486	FKBP2	11	64241003	64244132	+	1608	protein_coding	FK506 binding protein 2 [Source:HGNC Symbol;Acc:HGNC:3718]	-	13	11.37	0.225365	0.114748	0.999904
ENSG00000198832	SELENOM	22	31104772	31120069	-	3187	protein_coding	selenoprotein M [Source:HGNC Symbol;Acc:HGNC:30397]	-	1.61	2.18	-0.360222	0.114752	0.999904
ENSG00000115902	SLC1A4	2	64988477	65023865	+	6939	protein_coding	solute carrier family 1 member 4 [Source:HGNC Symbol;Acc:HGNC:10942]	-	2.14	2.63	-0.252039	0.114777	0.999904
ENSG00000162032	SPSB3	16	1776712	1793700	-	3192	protein_coding	splA/ryanodine receptor domain and SOCS box containing 3 [Source:HGNC Symbol;Acc:HGNC:30629]	-	0.11	0.03	0.54508	0.114807	NA
ENSG00000230870	FBXW11P1	21	31627127	31628600	-	1474	processed_pseudogene	F-box and WD repeat domain containing 11 pseudogene 1 [Source:HGNC Symbol;Acc:HGNC:1145]	-	0.01	0.1	-0.433939	0.114866	NA
ENSG00000277586	NEFL	8	24950955	24957110	-	4329	protein_coding	neurofilament light [Source:HGNC Symbol;Acc:HGNC:7739]	-	0.22	0.46	-0.574952	0.114901	0.999904
ENSG00000221882	OR3A2	17	3276942	3386317	-	2674	protein_coding	olfactory receptor family 3 subfamily A member 2 [Source:HGNC Symbol;Acc:HGNC:8283]	-	0.06	0.17	-0.56885	0.114918	NA
ENSG00000113532	ST8SIA4	5	100806935	100903266	-	7794	protein_coding	ST8 alpha-N-acetyl-neuraminide alpha-2,8-sialyltransferase 4 [Source:HGNC Symbol;Acc:HGNC:10871]	-	23.44	30.55	-0.30651	0.115001	0.999904
ENSG00000198121	LPAR1	9	110873263	111038458	-	4159	protein_coding	lysophosphatidic acid receptor 1 [Source:HGNC Symbol;Acc:HGNC:3166]	-	1.55	0.94	0.530411	0.115071	0.999904
ENSG00000149548	CCDC15	11	124954121	125041489	+	4823	protein_coding	coiled-coil domain containing 15 [Source:HGNC Symbol;Acc:HGNC:25798]	-	0.61	0.84	-0.371658	0.115071	0.999904
ENSG00000162545	CAMK2N1	1	20482391	20486220	-	2615	protein_coding	calcium/calmodulin dependent protein kinase II inhibitor 1 [Source:HGNC Symbol;Acc:HGNC:24190]	-	1.3	1.76	-0.353694	0.115098	0.999904
ENSG00000126562	WNK4	17	42780678	42796936	+	5089	protein_coding	WNK lysine deficient protein kinase 4 [Source:HGNC Symbol;Acc:HGNC:14544]	-	0.02	0.06	-0.532815	0.115122	NA
ENSG00000095777	MYO3A	10	25934071	26212536	+	8599	protein_coding	myosin IIIA [Source:HGNC Symbol;Acc:HGNC:7601]	-	0	0.02	-0.403286	0.11513	NA
ENSG00000068001	HYAL2	3	50317790	50322906	-	4545	protein_coding	hyaluronoglucosaminidase 2 [Source:HGNC Symbol;Acc:HGNC:5321]	-	1.48	1.15	0.358317	0.115147	0.999904
ENSG00000270504	AL391422.4	6	3751111	3753871	+	2761	antisense	novel transcript, antisense to PXDC1	-	0.08	0.19	-0.576092	0.115193	NA
ENSG00000276445	AC005393.1	19	39812972	39813555	-	584	lincRNA	novel transcript	-	0.14	0.46	-0.544852	0.115288	NA
ENSG00000086289	EPDR1	7	37683843	37951941	+	2864	protein_coding	ependymin related 1 [Source:HGNC Symbol;Acc:HGNC:17572]	-	0.91	1.35	-0.433754	0.11536	0.999904
ENSG00000185716	MOSMO	16	22007638	22087534	+	6122	protein_coding	modulator of smoothened [Source:HGNC Symbol;Acc:HGNC:27087]	-	2.1	1.79	0.254978	0.115381	0.999904
ENSG00000163106	HPGDS	4	94298535	94342876	-	2111	protein_coding	hematopoietic prostaglandin D synthase [Source:HGNC Symbol;Acc:HGNC:17890]	-	0.11	0.3	-0.565674	0.115432	NA
ENSG00000151240	DIP2C	10	274190	689668	-	8563	protein_coding	disco interacting protein 2 homolog C [Source:HGNC Symbol;Acc:HGNC:29150]	-	0.44	0.64	-0.417041	0.115459	0.999904
ENSG00000149305	HTR3B	11	113904677	113946565	+	2314	protein_coding	5-hydroxytryptamine receptor 3B [Source:HGNC Symbol;Acc:HGNC:5298]	-	0.26	0.11	0.57503	0.115477	NA
ENSG00000162522	KIAA1522	1	32741885	32774970	+	5965	protein_coding	KIAA1522 [Source:HGNC Symbol;Acc:HGNC:29301]	-	0.89	0.65	0.423469	0.115541	0.999904
ENSG00000225518	LINC01703	1	226083639	226090292	+	821	lincRNA	long intergenic non-protein coding RNA 1703 [Source:HGNC Symbol;Acc:HGNC:52491]	-	0	0.12	-0.366649	0.115606	NA
ENSG00000128683	GAD1	2	170813213	170861151	+	8242	protein_coding	glutamate decarboxylase 1 [Source:HGNC Symbol;Acc:HGNC:4092]	-	0	0.01	-0.366649	0.115606	NA
ENSG00000189184	PCDH18	4	137518918	137532494	-	6686	protein_coding	protocadherin 18 [Source:HGNC Symbol;Acc:HGNC:14268]	-	0	0.01	-0.366649	0.115606	NA
ENSG00000283453	AC244258.1	6	60281444	60546660	+	3018	transcribed_unprocessed_pseudogene	primase, DNA, polypeptide 2 (58kDa) (PRIM2) pseudogene	-	0	0.03	-0.366649	0.115606	NA
ENSG00000147113	CXorf36	X	45148374	45200901	-	6720	protein_coding	chromosome X open reading frame 36 [Source:HGNC Symbol;Acc:HGNC:25866]	-	0	0.01	-0.366649	0.115606	NA
ENSG00000237294	EIF4BP9	X	66074835	66076347	-	1513	processed_pseudogene	eukaryotic translation initiation factor 4B pseudogene 9 [Source:HGNC Symbol;Acc:HGNC:37942]	-	0	0.06	-0.366649	0.115606	NA
ENSG00000164946	FREM1	9	14734666	14910995	-	10762	protein_coding	FRAS1 related extracellular matrix 1 [Source:HGNC Symbol;Acc:HGNC:23399]	-	0	0.01	-0.366649	0.115606	NA
ENSG00000130950	NUTM2F	9	94318196	94328644	-	2561	protein_coding	NUT family member 2F [Source:HGNC Symbol;Acc:HGNC:23450]	-	0	0.04	-0.366649	0.115606	NA
ENSG00000124920	MYRF	11	61752642	61788518	+	10680	protein_coding	myelin regulatory factor [Source:HGNC Symbol;Acc:HGNC:1181]	NDT80/PhoG	0	0.01	-0.366649	0.115606	NA
ENSG00000152467	ZSCAN1	19	58034032	58054631	+	2389	protein_coding	zinc finger and SCAN domain containing 1 [Source:HGNC Symbol;Acc:HGNC:23712]	zf-C2H2	0	0.04	-0.366649	0.115606	NA
ENSG00000198156	NPIPB6	16	28342555	28363508	-	2135	protein_coding	nuclear pore complex interacting protein family member B6 [Source:HGNC Symbol;Acc:HGNC:37454]	-	0.55	0.34	0.516898	0.115669	0.999904
ENSG00000285486	AC003043.2	17	44276368	44281182	-	4061	lincRNA	novel transcript	-	0.03	0	0.413425	0.115761	NA
ENSG00000128159	TUBGCP6	22	50217689	50244992	-	7689	protein_coding	tubulin gamma complex associated protein 6 [Source:HGNC Symbol;Acc:HGNC:18127]	-	17.87	15.86	0.204329	0.115797	0.999904
ENSG00000052795	FNIP2	4	158769138	158908049	+	10868	protein_coding	folliculin interacting protein 2 [Source:HGNC Symbol;Acc:HGNC:29280]	-	1.15	0.9	0.353343	0.115823	0.999904
ENSG00000237007	KRT18P52	2	31822591	31823436	-	846	processed_pseudogene	keratin 18 pseudogene 52 [Source:HGNC Symbol;Acc:HGNC:37888]	-	0	0.13	-0.365415	0.115858	NA
ENSG00000272631	AC067750.1	10	86749754	86756298	-	6545	antisense	novel transcript, antisense to BMPR1A	-	0	0.02	-0.365415	0.115858	NA
ENSG00000090659	CD209	19	7739994	7747564	-	4413	protein_coding	CD209 molecule [Source:HGNC Symbol;Acc:HGNC:1641]	-	0.33	0.2	0.532074	0.116313	0.999904
ENSG00000125355	TMEM255A	X	120258650	120311556	-	3858	protein_coding	transmembrane protein 255A [Source:HGNC Symbol;Acc:HGNC:26086]	-	0.22	0.58	-0.568668	0.116351	0.999904
ENSG00000160014	CALM3	19	46601074	46610793	+	3667	protein_coding	calmodulin 3 [Source:HGNC Symbol;Acc:HGNC:1449]	-	37.4	44.46	-0.199591	0.116618	0.999904
ENSG00000180817	PPA1	10	70202830	70233911	-	5171	protein_coding	pyrophosphatase (inorganic) 1 [Source:HGNC Symbol;Acc:HGNC:9226]	-	6.4	5.5	0.24252	0.116665	0.999904
ENSG00000237883	DGUOK-AS1	2	73947642	73981441	-	865	antisense	DGUOK antisense RNA 1 [Source:HGNC Symbol;Acc:HGNC:43441]	-	0.53	0.24	0.573841	0.116688	NA
ENSG00000211734	TRBV5-1	7	142320677	142321544	+	652	TR_V_gene	T cell receptor beta variable 5-1 [Source:HGNC Symbol;Acc:HGNC:12218]	-	8.14	11.22	-0.368978	0.116697	0.999904
ENSG00000183292	PRSS40A	2	130570829	130584161	+	4282	transcribed_unprocessed_pseudogene	serine protease 40A [Source:HGNC Symbol;Acc:HGNC:37319]	-	0.01	0.05	-0.487789	0.116772	NA
ENSG00000141219	C17orf80	17	73232233	73248947	+	4663	protein_coding	chromosome 17 open reading frame 80 [Source:HGNC Symbol;Acc:HGNC:29601]	-	1.83	1.52	0.287895	0.116841	0.999904
ENSG00000077585	GPR137B	1	236142505	236221865	+	2309	protein_coding	G protein-coupled receptor 137B [Source:HGNC Symbol;Acc:HGNC:11862]	-	5.98	7.77	-0.316397	0.116851	0.999904
ENSG00000166402	TUB	11	8019244	8106112	+	6722	protein_coding	tubby bipartite transcription factor [Source:HGNC Symbol;Acc:HGNC:12406]	Tub	0.83	0.62	0.392705	0.116908	0.999904
ENSG00000229043	AC091729.3	7	1160374	1165267	+	2002	antisense	uncharacterized LOC101927021 [Source:NCBI gene;Acc:101927021]	-	1.06	0.74	0.450603	0.116999	0.999904
ENSG00000272434	AC137630.3	3	49029316	49029706	+	391	antisense	novel transcript, antisense to IMPDH2 and QRICH1	-	0.3	0.02	0.410632	0.11708	NA
ENSG00000233930	KRTAP5-AS1	11	1571353	1599184	+	2931	antisense	KRTAP5-1/KRTAP5-2 antisense RNA 1 [Source:HGNC Symbol;Acc:HGNC:27877]	-	0.66	0.96	-0.414225	0.117115	0.999904
ENSG00000260810	AL135818.2	14	91258299	91259003	+	705	lincRNA	novel transcript	-	0.47	1.05	-0.573021	0.117168	0.999904
ENSG00000228966	HOMER2P1	14	106460092	106461055	-	964	processed_pseudogene	HOMER2 pseudogene 1 [Source:HGNC Symbol;Acc:HGNC:20336]	-	0.02	0.16	-0.432471	0.117185	NA
ENSG00000183569	SERHL2	22	42553617	42574382	+	2821	protein_coding	serine hydrolase like 2 [Source:HGNC Symbol;Acc:HGNC:29446]	-	0.08	0.01	0.462423	0.117231	NA
ENSG00000123358	NR4A1	12	52022832	52059507	+	7295	protein_coding	nuclear receptor subfamily 4 group A member 1 [Source:HGNC Symbol;Acc:HGNC:7980]	NGFIB-like	1.03	1.44	-0.389463	0.117246	0.999904
ENSG00000206557	TRIM71	3	32818018	32897826	+	8685	protein_coding	tripartite motif containing 71 [Source:HGNC Symbol;Acc:HGNC:32669]	-	0.06	0.03	0.572976	0.117324	NA
ENSG00000027075	PRKCH	14	61187559	61550976	+	8833	protein_coding	protein kinase C eta [Source:HGNC Symbol;Acc:HGNC:9403]	-	5.06	6.83	-0.352335	0.117401	0.999904
ENSG00000249700	SRD5A3-AS1	4	55363971	55395847	-	5148	processed_transcript	SRD5A3 antisense RNA 1 [Source:HGNC Symbol;Acc:HGNC:44138]	-	0.14	0.07	0.569787	0.117462	0.999904
ENSG00000162836	ACP6	1	147629652	147670496	-	11960	protein_coding	acid phosphatase 6, lysophosphatidic [Source:HGNC Symbol;Acc:HGNC:29609]	-	0.99	0.82	0.294251	0.117561	0.999904
ENSG00000131914	LIN28A	1	26410778	26429722	+	4008	protein_coding	lin-28 homolog A [Source:HGNC Symbol;Acc:HGNC:15986]	CSD	0	0.02	-0.36339	0.117628	NA
ENSG00000168878	SFTPB	2	85657314	85668741	-	4110	protein_coding	surfactant protein B [Source:HGNC Symbol;Acc:HGNC:10801]	-	0	0.02	-0.36339	0.117628	NA
ENSG00000224843	LINC00240	6	26956992	27023924	+	6481	lincRNA	long intergenic non-protein coding RNA 240 [Source:HGNC Symbol;Acc:HGNC:18772]	-	0	0.01	-0.36339	0.117628	NA
ENSG00000254997	KRTAP5-9	11	71548418	71549553	+	1136	protein_coding	keratin associated protein 5-9 [Source:HGNC Symbol;Acc:HGNC:23604]	-	0	0.08	-0.36339	0.117628	NA
ENSG00000279684	AP003969.2	11	93286629	93288903	-	2275	TEC	novel transcript	-	0	0.04	-0.36339	0.117628	NA
ENSG00000117477	CCDC181	1	169394870	169460669	-	3961	protein_coding	coiled-coil domain containing 181 [Source:HGNC Symbol;Acc:HGNC:28051]	-	0.3	0.18	0.528124	0.117761	0.999904
ENSG00000283234	AL590556.2	1	21950679	21956871	-	1162	transcribed_unitary_pseudogene	novel pseudogene	-	0.12	0.01	0.433513	0.117786	NA
ENSG00000251429	AC098679.2	4	158270378	158278676	+	3616	transcribed_processed_pseudogene	axin interactor, dorsalization associated (AIDA) pseudogene	-	0.3	0.15	0.569258	0.117823	0.999904
ENSG00000106302	HYAL4	7	123828983	123877478	+	2738	protein_coding	hyaluronoglucosaminidase 4 [Source:HGNC Symbol;Acc:HGNC:5323]	-	0.03	0	0.36714	0.117883	NA
ENSG00000120457	KCNJ5	11	128891356	128921035	+	6109	protein_coding	potassium voltage-gated channel subfamily J member 5 [Source:HGNC Symbol;Acc:HGNC:6266]	-	0.01	0	0.36714	0.117883	NA
ENSG00000137500	CCDC90B	11	83259097	83286407	-	6561	protein_coding	coiled-coil domain containing 90B [Source:HGNC Symbol;Acc:HGNC:28108]	-	2.61	3.23	-0.255175	0.11789	0.999904
ENSG00000176933	TOB2P1	6	28217643	28218634	-	992	processed_pseudogene	transducer of ERBB2, 2 pseudogene 1 [Source:HGNC Symbol;Acc:HGNC:13986]	-	0.12	0	0.36511	0.117919	NA
ENSG00000271734	Z98200.1	6	108030249	108030718	-	470	lincRNA	novel transcript	-	0.52	1.16	-0.571808	0.117996	NA
ENSG00000138399	FASTKD1	2	169529749	169573875	-	4451	protein_coding	FAST kinase domains 1 [Source:HGNC Symbol;Acc:HGNC:26150]	-	4.15	3.3	0.336136	0.118119	0.999904
ENSG00000124782	RREB1	6	7107597	7251980	+	17254	protein_coding	ras responsive element binding protein 1 [Source:HGNC Symbol;Acc:HGNC:10449]	zf-C2H2	3.89	3.39	0.229117	0.11828	0.999904
ENSG00000205794	AC098591.1	4	40042917	40057199	-	1613	transcribed_processed_pseudogene	acyl-CoA thioesterase 7 pseudogene [Source:NCBI gene;Acc:344967]	-	0.31	0.14	0.57086	0.118307	NA
ENSG00000267114	AC011481.1	19	44950044	44954007	-	361	lincRNA	novel transcript	-	3.35	2.14	0.503543	0.118357	0.999904
ENSG00000245017	LINC02453	12	98485544	98503855	-	1918	lincRNA	long intergenic non-protein coding RNA 2453 [Source:HGNC Symbol;Acc:HGNC:53392]	-	0.17	0.33	-0.561625	0.118389	NA
ENSG00000166171	DPCD	10	101570560	101609668	+	1718	protein_coding	deleted in primary ciliary dyskinesia homolog (mouse) [Source:HGNC Symbol;Acc:HGNC:24542]	-	2.77	2.14	0.364044	0.118497	0.999904
ENSG00000137393	RNF144B	6	18387350	18468874	+	5175	protein_coding	ring finger protein 144B [Source:HGNC Symbol;Acc:HGNC:21578]	-	14.98	12.59	0.27848	0.118533	0.999904
ENSG00000186469	GNG2	14	51826195	51979342	+	6379	protein_coding	G protein subunit gamma 2 [Source:HGNC Symbol;Acc:HGNC:4404]	-	9.36	11.18	-0.207422	0.118987	0.999904
ENSG00000255867	DENND5B-AS1	12	31589923	31615666	+	1308	antisense	DENND5B antisense RNA 1 [Source:HGNC Symbol;Acc:HGNC:42517]	-	0.1	0.29	-0.554232	0.119062	NA
ENSG00000259678	AC066613.2	15	51414097	51498833	+	560	antisense	novel transcript, antisense to DMXL2	-	0.04	0.26	-0.464787	0.119109	NA
ENSG00000121073	SLC35B1	17	49700934	49709014	-	5928	protein_coding	solute carrier family 35 member B1 [Source:HGNC Symbol;Acc:HGNC:20798]	-	3.26	2.82	0.237425	0.119118	0.999904
ENSG00000176406	RIMS2	8	103500748	104256094	+	13619	protein_coding	regulating synaptic membrane exocytosis 2 [Source:HGNC Symbol;Acc:HGNC:17283]	-	0	0	0.364187	0.119148	NA
ENSG00000197599	CCDC154	16	1434383	1444556	-	2726	protein_coding	coiled-coil domain containing 154 [Source:HGNC Symbol;Acc:HGNC:34454]	-	1.9	1.33	0.455603	0.119261	0.999904
ENSG00000225399	AC121247.1	3	49260085	49261316	+	1232	lincRNA	novel transcript	-	0.24	0.08	0.541767	0.119336	NA
ENSG00000244682	FCGR2C	1	161581339	161605662	+	3580	polymorphic_pseudogene	Fc fragment of IgG receptor IIc (gene/pseudogene) [Source:HGNC Symbol;Acc:HGNC:15626]	-	2.24	3.03	-0.35191	0.119337	0.999904
ENSG00000179914	ITLN1	1	160876539	160885170	-	1483	protein_coding	intelectin 1 [Source:HGNC Symbol;Acc:HGNC:18259]	-	0.63	1.12	-0.533323	0.119368	0.999904
ENSG00000064607	SUGP2	19	18990888	19034023	-	8468	protein_coding	SURP and G-patch domain containing 2 [Source:HGNC Symbol;Acc:HGNC:18641]	-	15.97	14.29	0.193748	0.119382	0.999904
ENSG00000088826	SMOX	20	4120980	4187747	+	2946	protein_coding	spermine oxidase [Source:HGNC Symbol;Acc:HGNC:15862]	-	9.79	12.12	-0.249318	0.119433	0.999904
ENSG00000175274	TP53I11	11	44885903	44951306	-	7345	protein_coding	tumor protein p53 inducible protein 11 [Source:HGNC Symbol;Acc:HGNC:16842]	-	10.31	13.17	-0.284719	0.119489	0.999904
ENSG00000284543	LINC01226	1	31506226	31583306	+	9848	processed_transcript	long intergenic non-protein coding RNA 1226 [Source:HGNC Symbol;Acc:HGNC:49678]	-	0.04	0.09	-0.559636	0.119494	0.999904
ENSG00000112531	QKI	6	163414000	163578596	+	17368	protein_coding	QKI, KH domain containing RNA binding [Source:HGNC Symbol;Acc:HGNC:21100]	-	13.42	11.43	0.261154	0.119503	0.999904
ENSG00000173137	ADCK5	8	144373101	144393242	+	2742	protein_coding	aarF domain containing kinase 5 [Source:HGNC Symbol;Acc:HGNC:21738]	-	4.66	3.89	0.281666	0.119538	0.999904
ENSG00000131044	TTLL9	20	31870702	31944963	+	6175	protein_coding	tubulin tyrosine ligase like 9 [Source:HGNC Symbol;Acc:HGNC:16118]	-	0.06	0.02	0.543508	0.11962	NA
ENSG00000197063	MAFG	17	81918270	81927714	-	5220	protein_coding	MAF bZIP transcription factor G [Source:HGNC Symbol;Acc:HGNC:6781]	TF_bZIP	2.4	1.8	0.399942	0.119693	0.999904
ENSG00000155959	VBP1	X	155197007	155239817	+	2018	protein_coding	VHL binding protein 1 [Source:HGNC Symbol;Acc:HGNC:12662]	-	12.58	15.05	-0.210589	0.119758	0.999904
ENSG00000197191	CYSRT1	9	137224635	137226311	+	1297	protein_coding	cysteine rich tail 1 [Source:HGNC Symbol;Acc:HGNC:30529]	-	0.11	0.3	-0.55678	0.119851	NA
ENSG00000111452	ADGRD1	12	130953907	131141469	+	14718	protein_coding	adhesion G protein-coupled receptor D1 [Source:HGNC Symbol;Acc:HGNC:19893]	-	0.49	0.4	0.289247	0.119889	0.999904
ENSG00000173209	AHSA2P	2	61177418	61191203	+	9083	transcribed_unitary_pseudogene	activator of HSP90 ATPase homolog 2, pseudogene [Source:HGNC Symbol;Acc:HGNC:20437]	-	13.24	11.62	0.217626	0.119906	0.999904
ENSG00000105519	CAPS	19	5911707	5915877	+	4097	protein_coding	calcyphosine [Source:HGNC Symbol;Acc:HGNC:1487]	-	2.08	1.62	0.357045	0.119933	0.999904
ENSG00000248477	AC139495.1	5	69607099	69624049	+	1073	transcribed_unprocessed_pseudogene	NLR family, apoptosis inhibitory protein (NAIP) pseudogene	-	2.31	5.18	-0.56796	0.119943	0.999904
ENSG00000137875	BCL2L10	15	52109263	52112775	-	1319	protein_coding	BCL2 like 10 [Source:HGNC Symbol;Acc:HGNC:993]	-	0.01	0.11	-0.422818	0.120053	NA
ENSG00000274373	AC148476.1	12	132424504	132425208	-	705	lincRNA	novel transcript	-	0.4	0.14	0.550066	0.120079	NA
ENSG00000176919	C8G	9	136945185	136946975	+	1152	protein_coding	complement C8 gamma chain [Source:HGNC Symbol;Acc:HGNC:1354]	-	0.83	1.57	-0.551259	0.120168	0.999904
ENSG00000079156	OSBPL6	2	178194481	178402891	+	11486	protein_coding	oxysterol binding protein like 6 [Source:HGNC Symbol;Acc:HGNC:16388]	-	0.12	0.08	0.516576	0.120198	0.999904
ENSG00000144655	CSRNP1	3	39141855	39154562	-	3214	protein_coding	cysteine and serine rich nuclear protein 1 [Source:HGNC Symbol;Acc:HGNC:14300]	-	14.18	18.4	-0.302119	0.120426	0.999904
ENSG00000161956	SENP3	17	7561875	7571969	+	3668	protein_coding	SUMO specific peptidase 3 [Source:HGNC Symbol;Acc:HGNC:17862]	-	2.81	2.3	0.303296	0.120516	0.999904
ENSG00000211947	IGHV3-21	14	106235064	106235594	-	430	IG_V_gene	immunoglobulin heavy variable 3-21 [Source:HGNC Symbol;Acc:HGNC:5586]	-	11.44	15.75	-0.372823	0.120602	0.999904
ENSG00000141979	AC008764.1	19	16479067	16628204	-	2567	protein_coding	novel transcript	-	0.33	0.56	-0.504135	0.120905	0.999904
ENSG00000116729	WLS	1	68098473	68233120	-	4469	protein_coding	wntless Wnt ligand secretion mediator [Source:HGNC Symbol;Acc:HGNC:30238]	-	1.55	2.21	-0.395497	0.121025	0.999904
ENSG00000285825	AP003501.3	11	124950331	124953555	-	952	lincRNA	novel transcript	-	0.19	0.03	0.45338	0.121025	NA
ENSG00000272721	AC131235.3	3	184134019	184135238	-	386	antisense	novel transcript, antisense to EIF2B5	-	0.32	0.88	-0.556384	0.121039	NA
ENSG00000163482	STK36	2	218672026	218702716	+	6458	protein_coding	serine/threonine kinase 36 [Source:HGNC Symbol;Acc:HGNC:17209]	-	2.14	1.8	0.271897	0.121047	0.999904
ENSG00000153347	FAM81B	5	95391344	95450454	+	2495	protein_coding	family with sequence similarity 81 member B [Source:HGNC Symbol;Acc:HGNC:26335]	-	0.09	0.24	-0.55349	0.121098	NA
ENSG00000090581	GNPTG	16	1351923	1364113	+	4102	protein_coding	N-acetylglucosamine-1-phosphate transferase subunit gamma [Source:HGNC Symbol;Acc:HGNC:23026]	-	14.49	12.66	0.227649	0.121113	0.999904
ENSG00000139190	VAMP1	12	6462237	6470987	-	3580	protein_coding	vesicle associated membrane protein 1 [Source:HGNC Symbol;Acc:HGNC:12642]	-	0.78	0.57	0.419235	0.121196	0.999904
ENSG00000108984	MAP2K6	17	69414698	69553861	+	16655	protein_coding	mitogen-activated protein kinase kinase 6 [Source:HGNC Symbol;Acc:HGNC:6846]	-	1.44	1.19	0.296751	0.121325	0.999904
ENSG00000215375	MYL5	4	673580	682033	+	4305	protein_coding	myosin light chain 5 [Source:HGNC Symbol;Acc:HGNC:7586]	-	3.28	2.54	0.366288	0.121376	0.999904
ENSG00000233750	CICP27	1	131025	134836	+	3812	processed_pseudogene	capicua transcriptional repressor pseudogene 27 [Source:HGNC Symbol;Acc:HGNC:48835]	-	0.76	1.32	-0.519423	0.121508	0.999904
ENSG00000133773	CCDC59	12	82223681	82358805	-	3784	protein_coding	coiled-coil domain containing 59 [Source:HGNC Symbol;Acc:HGNC:25005]	-	3.62	4.4	-0.23104	0.121627	0.999904
ENSG00000176845	METRNL	17	83079691	83095119	+	2626	protein_coding	meteorin like, glial cell differentiation regulator [Source:HGNC Symbol;Acc:HGNC:27584]	-	15.48	19.66	-0.277097	0.121922	0.999904
[truncated: 22,740 more rows]
